1 **Can longitudinal electronic health record data identify patients at**  
2 **higher risk of developing long COVID?**

3 Priya Shanmugam<sup>1</sup>, Molly Bair<sup>1</sup>, Emma Pendl-Robinson<sup>1</sup>, Xindi C. Hu<sup>1,\*</sup>

4 <sup>1</sup>Mathematica, Inc., Princeton, NJ 08543

5 \*Corresponding author:

6 Xindi C. Hu, ScD

7 Mathematica, Inc., Princeton, NJ 08543

8 chu@mathematica-mpr.com

9

10 **Table of contents**

11 Abstract..... 2  
12 1. Introduction ..... 2  
13 2. Our approach to predicting long COVID ..... 4  
14 3. Characteristics of Sample ..... 7  
15 4. Summary statistics for Cognitive, Fatigue, and Respiratory variations of Long  
16 COVID ..... 9  
17 5. Predictive model for long COVID outcomes ..... 10  
18 Conclusion ..... 12  
19 Acknowledgements..... 15  
20 References ..... 19  
21 Tables ..... 23  
22 Table 1: Analytic Sample ..... 23  
23 Table 2: Model Performance Results ..... 25  
24 Table 3: Coefficient Values for the Binary Logistic Regression Models..... 26  
25 Table 4: Impurity-Based Variable Importance Scores for the Random Forest Models. 27  
26 Appendix..... 28  
27 Appendix A1: Covariate OMOP Codes..... 28  
28 Appendix A2: Qualifying Cognitive Symptoms and OMOP Codes ..... 76  
29 Appendix A3: Qualifying Fatigue Symptoms and OMOP Codes ..... 77  
30 Appendix A4: Qualifying Respiratory Symptoms and OMOP Codes..... 81  
31

32 **Abstract**

33 With hundreds of millions of COVID-19 infections to date, a considerable portion of the population has  
34 developed or will develop long COVID. Understanding the prevalence, risk factors, and healthcare costs  
35 of long COVID can be of significant societal importance. To investigate the utility of large-scale  
36 electronic health record (EHR) data in identifying and predicting long COVID, we analyzed data from the  
37 National COVID Cohort Collaborative (N3C), a longitudinal EHR data repository from 65 sites in the US  
38 with over 8 million COVID-19 patients. We characterized the prevalence of long COVID using a few  
39 different types of definition to illustrate their relative strengths and weaknesses. Then we developed a  
40 machine learning model to predict the risk of developing long COVID using demographic factors and  
41 comorbidity in the EHR. The risk factors for long COVID include patient age; sex; smoking status; and  
42 comorbidities characterized by the Charlson Comorbidity Index.

43

44 **1. Introduction**

45 Three years into the COVID-19 pandemic, by November 2022, 94% of the US population was estimated  
46 to have been infected by SARS-CoV-2 at least once (Klaassen et al., 2022). Some people recover quickly  
47 after the initial infection, while others (between 10% to 30%) continue to experience symptoms even  
48 months after the initial infection (Herman et al., 2022). Long COVID is defined by the World Health  
49 Organization (WHO) as persistent symptoms and/or long-term complications following a probable or  
50 confirmed SARS-CoV-2 infection, usually 3 months from acute infection and lasting longer than 2  
51 months with no probable alternative diagnosis (Nittas et al., 2022; World Health Organization, 2021).  
52 However, many challenges exist around diagnosing and managing patients with long COVID and  
53 identifying individuals who may have elevated risks of developing long COVID. Partially because the  
54 long-term effects of COVID-19 may exhibit differently for different people, or because tracking  
55 symptoms that can wax and wane over a long period of time can be difficult. Here we leverage a  
56 longitudinal electronic health record (EHR) data repository to test a few definitions of long COVID and

57 develop a risk prediction model to identify patients at higher risks of developing long COVID. With  
58 hundreds of millions of COVID-19 infections to date, a considerable portion of the population has  
59 developed or will develop long COVID. Understanding the prevalence, risk factors, and healthcare costs  
60 of long COVID can be of significant societal importance. The healthcare sector needs to better understand  
61 the demand for medical care due to long COVID and be prepared to deliver that. Public health sector  
62 needs to be able to identify population segments at elevated risks for long COVID in order to design and  
63 implement targeted intervention strategies.

64 More than 80 symptoms have been identified in the literature to be potentially associated with long  
65 COVID (Nasserie et al., 2021). Like the initial SARS-CoV-2 infection, long COVID could affect multiple  
66 organs and body systems. The most common symptoms include fatigue, dyspnea, cardiac abnormalities,  
67 cognitive impairment, sleep disturbances, symptoms of post-traumatic stress disorder, muscle pain,  
68 concentration problems, and headache (Crook et al., 2021). In addition to a long list of symptoms,  
69 information on symptom severity, duration, and co-occurrence is generally lacking in the literature.

70 Several approaches exist among published studies to characterize long COVID: some uses a very liberal  
71 definition of having at least one symptom which result in high percentage of patients estimated to have  
72 long COVID but is likely an overestimate (CDC, 2023), some focuses on the most salient symptoms like  
73 fatigue, headache, dyspnea and anosmia (Sudre et al., 2021), some focuses on symptom clusters to  
74 capture the overlapping symptoms (Global Burden of Disease Long COVID Collaborators, 2022).

75 A wide range of prevalence estimates for long COVID may be a result of non-standardized definition,  
76 virulence of different SARS-CoV-2 variants, and population immunity. Prevalence of as high as 80% was  
77 observed in early studies, using a lenient definition of at least one symptom, among patients who were  
78 previously hospitalized (Nasserie et al., 2021). The Centers of Disease Control and Prevention (CDC)  
79 estimated that nearly one in five American adults who have had COVID-19 still have long COVID (CDC,  
80 2022). More recently, the Global Burden of Disease Long COVID Collaborators estimated that 6.2%  
81 individuals have at least one of the three select-reported long COVID symptom clusters (Global Burden

82 of Disease Long COVID Collaborators, 2022). As a result of the uncertainty around the prevalence of  
83 long COVID, the economic cost of long COVID is hard to fully grasp, but safe to assume it would be an  
84 enormous number. Cutler and Summers estimated the economic costs of long COVID to be \$2.6 trillion  
85 in 2020, and later updated it to be \$3.7 trillion as a result of higher prevalence of long COVID than  
86 previously assumed (D. Cutler, 2022; D. M. Cutler & Summers, 2020).

87 The enormity of the economic costs and societal impact of long COVID highlights the necessity to  
88 develop better methods at detecting, treating, and preventing long COVID. In this study, we analyzed data  
89 from the National COVID Cohort Collaborative (N3C), a longitudinal EHR data repository from 65 sites  
90 in the US with over 8 million COVID-19 patients (Haendel et al., 2021). We characterize the prevalence  
91 of long COVID using a few different types of definition to illustrate their relative strengths and  
92 weaknesses. Then we develop a machine learning model to predict the risk of developing long COVID  
93 using demographic factors and comorbidity in the EHR. We discuss model performance with a focus on  
94 features with strong predictive power that can be utilized to design early detection or targeted intervention  
95 strategies. We end the manuscript by discussing how EHR data derived risk prediction model can be used  
96 to enhance an individual COVID-19 risk calculator, 19andMe, to support individual and clinical decision  
97 making.

## 98 2. Our approach to predicting long COVID

99 Several features of long COVID make identifying positive cases using claims and EHR data challenging.  
100 First, the condition is still most defined as an evolving set of symptoms lacking clear signifiers such as an  
101 ICD-9 code or a diagnostic test (Garg et al., 2021; Nabavi, 2020; Sudre et al., 2021). Second, some  
102 symptoms of long COVID may or may not be detectable, depending on which diagnostic test is used  
103 (Mancini et al., 2021). Third, due to early skepticism within the medical profession about the existence of  
104 COVID-19, there have been significant informal, patient-led efforts to report and track the various  
105 symptoms of long COVID (Patient Led Research Collaborative, 2023). Third, symptoms occurring  
106 during the long COVID episode must be separated from the initial episode of COVID itself, which may

107 vary in length and severity. Fourth, like other medical conditions, a claims-based definition must be  
108 clinically relevant with respect to disease severity, and account for health conditions a patient may have  
109 had prior to their COVID and long COVID episodes.

110 Given these challenges, we tested several approaches to defining long COVID using data from the N3C  
111 Enclave. We first defined a six-month lookback & look-forward window around each patients' index  
112 COVID-19 episode and limited our sample to patients who have healthcare utilization (defined as having  
113 a condition recorded in the N3C database) prior to, and after, these windows. This allowed us to  
114 accurately classify a lack of healthcare utilization during the lookback or look-forward windows as true  
115 non-utilization, as opposed to a patient death, relocation, or otherwise missing data. We then identified all  
116 OMOP concept ID condition codes that appear on a patient's record between 90 and 180 days following  
117 their index COVID-19 diagnosis. Excluding conditions recorded within 90 days after an initial COVID-  
118 19 diagnosis ensured that we do not flag symptoms of COVID-19 as symptoms of long COVID. From the  
119 resulting set of symptoms, we removed any symptoms that appeared on a patient's record during their  
120 lookback window. A drawback of this approach is that it reduces the likelihood that we detect long  
121 COVID cases among people with chronic conditions or comorbidities, who are actually most likely to  
122 contract long COVID. We additionally removed any symptoms during the look-forward period that do  
123 not appear on the list of 76 conditions in the N3C Long COVID OMOP condition code set. The  
124 remaining symptoms were considered as the patient's long COVID symptom burden.

### 125 **Defining long COVID by number of long COVID symptoms**

126 We first investigated the number of long COVID symptoms each patient has, out of a total of 76. To  
127 create a binary indicator of whether a patient has long COVID, we looked at the prevalence of the  
128 conditions in our code set and align them with the literature on the prevalence of long COVID in claims  
129 data. Estimates suggested that anywhere from 7-20% of adults experienced symptoms associated with  
130 long COVID after their initial infection (CDC NCHS, 2022). In order to achieve an overall prevalence of

131 long COVID of approximately 10%, we chose a cutoff of 3 or more long covid symptoms. We then  
132 modeled this binary measure of long COVID as a function of patient demographics.

### 133 **Categorizing long COVID symptoms by body system**

134 Next, we modified our definition of long COVID to account for possible disease body system subtypes.  
135 Consider a set of symptoms of long COVID that are positively correlated with age, and another set of  
136 symptoms that are negatively correlated with age. It is possible that younger long COVID patients are  
137 more likely to have certain symptoms and less likely to have others; male patients may have one cluster of  
138 symptoms and females another. Computing the total volume of long COVID symptoms potentially  
139 obscures the specific relationship between each “type” of long-covid and any patient demographics. To  
140 address this concern, we classified the 76 symptoms according to which body system each relates to, and  
141 complete body system-specific scores (e.g. Neurological; Musculoskeletal; Cardiovascular) (Davis et al.,  
142 2021). Neurological long COVID was the rarest subtype, while Pulmonary and Cardiovascular long  
143 COVID symptoms were the most common in our sample.

### 144 **Reducing redundancies in conditions**

145 Next, we considered that the N3C long COVID OMOP condition code set contains several potential  
146 redundancies, and that these conditions might be over-reported in claims and EHR data due to upcoding.  
147 For example, the following pairs of symptoms were similar to one another, yet each appeared as an  
148 independent item in the OMOP code set: sleep disturbances and insomnia, nausea and vomiting, body  
149 aches and muscle pain, and fatigue and exercise intolerance. We consolidated these redundancies in a  
150 patient’s look-forward period prior to calculating each patient’s long COVID symptom score. This  
151 reduced the number of long covid symptoms from 76 to 72.

### 152 **3 symptom cluster approach**

153 Lastly, we built off of the recent literature by calculating a cluster-specific score for each of three  
154 symptom clusters (Cognitive, Respiratory, and Fatigue) (Global Burden of Disease Long COVID  
155 Collaborators, 2022). We created three cluster-specific, binary long COVID definitions based on a cutoff

156 of at least 3 distinct long COVID symptoms within the relevant cluster. This approach provided a few  
157 advantages: it built off the clinical literature identifying these three symptom clusters as distinct, allowing  
158 us to classify each patient into each subtype without concern for whether a patient exhibits symptoms  
159 from multiple clusters. Second, it allowed us to capture variation in the relationship between patient  
160 demographics and various long COVID subtypes. Third, it allowed us to draw distinctions between more  
161 and less severe symptom clusters of long COVID, and potentially identify predictive targets that capture  
162 high-morbidity or high-cost events.

### 163 3. Characteristics of Sample

164 We used the N3C de-identified “tier 2 access” data set.<sup>1</sup> A limitation of our analysis is that the Patient  
165 Severity and Scores data base, condition occurrence, and drug exposure datasets are frequently updated  
166 within the N3C data enclave and new records being added. Our analysis we used the Patient Severity and  
167 Scores data base version 60 which was released on January 20, 2022. Thus, all patients in our analysis  
168 were diagnosed on or before January 20, 2022. Therefore, our results do not capture recent changes in the  
169 COVID-19 pandemic including the rise in the prevalence of the omicron variant, vaccination, and vaccine  
170 booster doses.

171 For our analysis, we started with 10,616,136 patients from the Patient Severity and Scores database and  
172 filtered down to the patients with lab confirmed positive cases (2,730,826 patients). Finally, we selected  
173 the patients who had conditions occurrences within the 6 months preceding and proceeding diagnosis of

---

<sup>1</sup> Tire 2 access is the patient level EHR data where 17 patient identifier variables are removed and longitudinal data is data-shifted to safeguard privacy (Haendel et al., 2021). We selected patients for the analysis from the Patient Severity and Scores data base (Release-v60-2022-01-20). The data base contains patient level information from all sites. N3C identifies positive COVID-19 cases through their COVID-19 Phenotype Inclusion Criteria (Pfaff, 2022). Though this did not factor into our analysis, another feature of the N3C data is a 1:2 case to control ratio of patients with identifies lab-confirmed, suspected, and possible cases of COVID-19 to patients who have been screen and tested negative for COVID-19. In addition, we linked patient ids from the Patient Severity and Scores data base with two additional datasets provided in N3C, the condition occurrence dataset (Release-v70-2022-03-19) and the drug exposures data set (Release-v70-2022-03-19) to provide additional longitudinal information about the patients in the database. These condition occurrence dataset records diagnosis, signs, and symptoms of conditions and drug exposure dataset records introduction of drugs into the body of the patient overtime (Observational Health Data Sciences and Informatics, 2018).

174 COVID-19,<sup>2</sup> whose COVID-19 visit start date is after June 6, 2019, and who did not die from COVID-19.

175 This provided us with our final analytic sample of 1,890,367 patients.

176 We selected covariates based on our literature review of covariates other researchers have found are

177 related to long COVID symptoms (Tsampasian et al., 2023). We identified the following covariates using

178 the Patient Severity and Scores database: age, sex, race, ethnicity, and current or former smoking status.

179 We categorized the patient's age at diagnosis into 9 categories (0-9, 10-19, 20-29, 30-39, 40-49, 50-59,

180 60-69, 70-79, and 80+ years old) for patients missing age, we imputed age as the median age 41.2 which

181 translates to the age category 40-49. We categorized sex as male, female, or other. Race was defined as

182 White, Black or African American, Asian, Native Hawaiian or Other Pacific Islander, Other, and

183 Missing/Unknown. Ethnicity was defined as Hispanic or Latino, Not Hispanic or Latino, and Ethnicity

184 Missing or Unknown.

185 In addition, we identified the following covariates using the OMOP code set ids in the condition

186 occurrence and drug exposure datasets for the dates prior to the covid diagnosis: COVID-19 vaccination,

187 pregnancy, hypertension, obesity, immunocompromised, and Charlson Comorbidity Index (CCI) score

188 (Glasheen et al., 2019). If patients OMOP codes for the comorbidity's pregnancy, hypertension, obesity,

189 immunocompromised, or CCI score do not appear in the condition occurrence data before the COVID-19

190 diagnosis, then we categories the patient as not having the respective comorbidity. We considered a

191 patient vaccinated if a patient receives one or more doses of a Pfizer, Moderna, or Johnson and Johnson

192 vaccine before diagnosis of COVID-19 as recorded in the drug exposure dataset. We a considered a

193 patient pregnant if the condition start date was within a year of COVID-19 diagnosis. See Appendix A1

194 for full list of the OMOP codes we used to create the covariates.

---

<sup>2</sup> For selecting the patients how has conditions occurrences within 6 months preceding and proceeding diagnosis, we used the condition occurrence dataset Release-v111-2023-02-16



195 Our sample is 56% (n = 1,056,464) female, 68% (n = 1,281,718) White, 2% (n =40,496) received at least  
196 on dose of a COVID-19 vaccine, 23% (n = 433,902) are 60 years old or older, see Table 1 for additional  
197 attributes of the analytic sample.

198 Several limitations exist in our data. First, the observed conditions dataset only records diagnoses, signs,  
199 or symptoms of a condition either observed by a provider or reported by the patient (Blacketer, 2021).

200 This limitation might have affected the makeup of the sample through: 1) underreporting conditions  
201 because patients might have conditions treated at another facility not sharing data with N3C, 2) excluding  
202 the healthiest patients because they did not have any reported conditions in the six months before and  
203 after the COVID-19 diagnosis. The vaccination status has a similar limitation where vaccination data are  
204 reported by clinics, pharmacies, or patients (Blacketer, 2021). Due to this limitation, our sample may  
205 underestimate the vaccination rates if patients received vaccinations at a facility not sharing data with  
206 N3C. The low vaccination rates in our data might have led to a weaker relationship between vaccination  
207 and Long COVID symptoms in our findings. Due to our concerns with the vaccination variable, we  
208 choose not to include vaccination in our modeling.

#### 209 4. Summary statistics for Cognitive, Fatigue, and Respiratory variations of Long COVID

210 We examined long COVID by three symptom clusters -- cognitive, fatigue, and respiratory -- as defined  
211 by the Global Burden of Disease Long COVID Collaborators (Global Burden of Disease Long COVID  
212 Collaborators, 2022). We classified patients as being positive for the individual symptom clusters if the  
213 patients had a qualifying symptom present between 3 to 6 months after having a lab confirmed case of  
214 COVID-19 and that symptom was not reported in the 6 months preceding their lab confirmed case of  
215 COVID-19. For a full list of the symptoms and OMOP codes we used as qualifying cognitive, fatigue,  
216 and respiratory long COVID symptoms, see Appendix A2, A3, and A4 respectively. Then we focused our  
217 analysis on the three separate symptom clusters and predicting the risk of a patient having each symptom  
218 cluster of long COVID systems.

219 The fatigue long COVID symptom cluster was the most common in our sample with 5% (n = 107,565) of  
220 all patients, followed by respiratory cluster with 3% (n = 58,369) of our sample, and the cognitive  
221 symptom cluster with only 0.3% (n = 5,294) of the sample (Table 1). In general, for the cognitive and  
222 fatigue symptom clusters, there is an age gradient where patients in younger age groups have lower rates  
223 of symptom clusters than patients in older groups. However, there is not a clear age gradient for the  
224 fatigue symptom cluster. Female patients have higher rates (6.6%) of the fatigue symptom cluster than  
225 male patients (3.9%) and there is no difference in rates between the sexes for the cognitive symptom  
226 clusters (both 0.3%) and respiratory (female = 3.4%; male = 2.9%). Black and White patients have higher  
227 prevalence than other race groups for all three symptom clusters. There is not a meaningful difference in  
228 prevalence by ethnicity. Patients who had cognitive, fatigue, and respiratory symptom clusters have  
229 higher average CCI scores than those who did not experience said symptom clusters. The highest average  
230 CCI scores were patients who had cognitive cluster symptoms (mean = 2.7), compared to fatigue (mean =  
231 1.3) and respiratory (mean = 1.5) symptom clusters. For other variables we do not observe large  
232 differences between groups.

## 233 5. Predictive model for long COVID outcomes

### 234 **Model training methods**

235 We trained two types of machine learning models (a binary logistic regression model and a binary random  
236 forest model) on all three long COVID clusters separately: respiratory, fatigue, and cognitive. We used a  
237 70-30 train-test split, resulting in 1,323,256 training observations and 567,111 test observations. To  
238 accommodate for long COVID being a rare outcome in all three of our clusters, we trained all models on  
239 down sampled data and tested them on the original, unbalanced data. To create the down sampled training  
240 data, we took five bootstrapped samples with replacement. Each bootstrapped sample has an equal  
241 number of positive and negative cases, which also equal to the total number of positive cases in the  
242 original training data.

243 **Model performance**

244 The random forest model outperforms the logistic regression model at predicting the respiratory and  
245 cognitive clusters, but the logistic regression model slightly outperforms the random forest model at  
246 predicting the fatigue outcome (Table 2). In all six models, the AUC remains fairly consistent between the  
247 train and test data, but the F1 score drops quite dramatically between the train and test data. Because we  
248 know that the precision also drops between train and test, this tells us that our models do not adequately  
249 detect long COVID cases in any cluster. This could be because long COVID is a rare outcome, or that  
250 there is low signal in the data.

251 **Covariates**

252 To measure feature importance, we considered coefficient values for the binary logistic regression models  
253 and impurity-based variable importance scores for the random forest models (Tables 3 and 4). Among our  
254 six models, there were some variations in which covariates were most predictive. The CCI score was the  
255 most important feature in all three clusters for the random forest models. However, for the binary logistic  
256 regression models, all three clusters had different most important features. For the respiratory cluster, the  
257 two most important features are belonging to the 0 – 9 age group and being a current or former smoker.  
258 For the fatigue cluster, the two most important features are belonging to the 0 – 9 age group and being  
259 male. Finally, for the cognitive cluster, the two most important features are being 80 years old or older  
260 and belonging to the 0 – 9 age group.

261 **Comparisons with other long COVID predictive models**

262 One challenge in comparing models is that there is not a consistent definition of long COVID that is  
263 universally accepted. The two papers described below offer two alternative definitions of long COVID.  
264 One study also uses data from N3C to predict outcomes of long COVID. The authors consider visiting a  
265 long COVID clinic as an indicator that a patient has long COVID (Pfaff, 2022). This is a narrower  
266 definition of long COVID than our definition in this study. Their XGBoost model results in an AUC of  
267 0.92 for all patients in their sample, 0.90 for hospitalized patients, and 0.85 for non-hospitalized patients.

268 The simplicity of their measure could explain why their results are better than the results from our  
269 models. However, there are also drawbacks to defining long COVID as a visit to a long COVID clinic. a  
270 long COVID clinic is a very specific type of care and someone’s long COVID symptoms have to be  
271 pretty severe to be referred to a long COVID clinic. Thus, the Pfaff definition undercounts the number of  
272 patients with long COVID especially patients with more mild symptoms of long COVID.

273 Another study used age, sex, and the number of symptoms a patient experienced in the first week of  
274 infection to classify duration of COVID-19 as either short (less than 10 days) or long (28 days or more,  
275 which is shorter than the WHO recommendation) using k-means clustering (Sudre et al., 2021). The  
276 authors analyzed self-reported data from 4,182 cases of COVID-19 through the COVID Symptom Study  
277 app and used a random forest model and a logistic regression model to predict long COVID, as defined by  
278 having symptoms for 28 days or longer. The random forest model, which included first week symptoms  
279 and other comorbidities, performed moderately well with an AUC of 0.768. The logistic regression model  
280 was much simpler and included only age, sex, and number of symptoms in the first week, with an AUC of  
281 0.767. One key difference between Sudre et al and our model is that Sudre et al included the number of  
282 symptoms in the first week which is likely a proxy for identify which patients had more severe initial  
283 COVID infections, whereas our model had limited variables representing the severity of initial infection.

## 284 Conclusion

### 285 **Overarching takeaways regarding model performance**

286 In this study, we explored the feasibility to train a predictive model to provide insights into the risk  
287 factors for long COVID. We leveraged a diverse and harmonized electronic health record data source and  
288 applied minimum filters to build a model with high potential to be applied to general population. After  
289 using techniques to handle unbalanced sample, our predictive models achieved moderate performance  
290 accuracy (AUC 0.604 – 0.732 for the random forest models, AUC 0.608 – 0.732 for the logistic  
291 regression models). It is interesting to observe that logistic regression models have comparable  
292 performance to random forest models, potentially because we included relatively limited number of

293 predictors that are easy to acquire. Other predictive models developed in the past had stronger  
294 performances but they either leveraged clinical factors that can be hard to acquire such as blood oxygen,  
295 blood pH (Bennett et al., 2021), or they limited the population to a small and relatively homogenous  
296 groups of people, such as users of the COVID Symptom Study app or patients visiting a long COVID  
297 clinic (Pfaff, 2022; Sudre et al., 2021).

### 298 **Comparison with 19&Me severe COVID risk model**

299 Previously we leveraged the same data source (N3C) and machine learning models to build a predictive  
300 model for severe COVID-19 outcomes. Severe COVID-19 outcome is defined as having a score of 6 or  
301 above using the Clinical Progression Scale (CPS) established by the World Health Organization for  
302 COVID-19 clinical research (Marshall et al., 2020). In a sample of 864,8080 COVID-19 positive  
303 patients, 15,401 (1.75%) has this outcome. Many risk factors are related to elevated COVID-19 risk, and  
304 others have published machine learning models that achieve high predictive performance (AUROC =  
305 0.87) using a long list of predictors including demographics (age/sex/race), health conditions  
306 (comorbidities) and clinical characteristics (blood pH, respiratory rate, oxygen saturation...). We limit  
307 the predictors to those easily accessible in the 19andMe app (age/sex/race/comorbidities/smoking  
308 status/vaccination status). Since the outcome is highly unbalanced, we used down sampling and up  
309 weighting to handle the sample unbalance. We experimented with different modeling techniques such as  
310 random forest and logistic regression, with and without the downsampling techniques. The best  
311 performing model was the logistic regression with downsampled data (Table 2).

### 312 **Implications for future work: learnings on N3C data**

313 The N3C is a nationally representative, harmonized data resource that we can leverage for COVID-19  
314 research, among other data sources that our team already have experience with. In addition to the data  
315 tables that we explored in the current work, several other data tables such as visitation occurrence can be  
316 potentially useful for future similar work. In our current work, we can only create a flag variable for  
317 whether or not the patient has certain symptoms, without the ability to rate its severity. Information in the

318 visitation occurrence table can be helpful because it has visit start and end date, which can then be used to  
319 characterize the severity of the condition. This can be a future area of modeling enhancement.

320 Machine learning models have utilities in building predictive models for both severe COVID outcomes  
321 and long COVID. The severe COVID model had better performance, partially because of a clear  
322 definition of severe COVID and relative follow-up period. The model building process could benefit  
323 from close collaborations between data scientists, health service researchers and clinicians. The models  
324 developed in this study may be valuable to both payers to improve their understanding of the risks of their  
325 insured population, and to public health officials to better plan for the resources needed to improve  
326 population health in the aftermaths of COVID-19 pandemic.

## 327 Acknowledgements

328 This work is supported by Mathematica.

329 N3C Attribution

330 The analyses described in this manuscript were conducted with data or tools accessed through the  
331 NCATS N3C Data Enclave <https://covid.cd2h.org> and N3C Attribution & Publication Policy v 1.2-2020-  
332 08-25b supported by NCATS U24 TR002306, Axle Informatics Subcontract: NCATS-P00438. This  
333 research was possible because of the patients whose information is included within the data and the  
334 organizations (<https://ncats.nih.gov/n3c/resources/data-contribution/data-transfer-agreement-signatories>)  
335 and scientists who have contributed to the on-going development of this community resource  
336 [<https://doi.org/10.1093/jamia/ocaa196>].

337 Individual Acknowledgements For Core Contributors

338 We gratefully acknowledge the following core contributors to N3C:

339 Adam B. Wilcox, Adam M. Lee, Alexis Graves, Alfred (Jerrod) Anzalone, Amin Manna, Amit Saha,  
340 Amy Olex, Andrea Zhou, Andrew E. Williams, Andrew Southerland, Andrew T. Girvin, Anita Walden,  
341 Anjali A. Sharathkumar, Benjamin Amor, Benjamin Bates, Brian Hendricks, Brijesh Patel, Caleb  
342 Alexander, Carolyn Bramante, Cavin Ward-Caviness, Charisse Madlock-Brown, Christine Suver,  
343 Christopher Chute, Christopher Dillon, Chunlei Wu, Clare Schmitt, Cliff Takemoto, Dan Housman,  
344 Davera Gabriel, David A. Eichmann, Diego Mazzotti, Don Brown, Eilis Boudreau, Elaine Hill, Elizabeth  
345 Zampino, Emily Carlson Marti, Emily R. Pfaff, Evan French, Farrukh M Koraisly, Federico Mariona,  
346 Fred Prior, George Sokos, Greg Martin, Harold Lehmann, Heidi Spratt, Hemalkumar Mehta, Hongfang  
347 Liu, Hythem Sidky, J.W. Awori Hayanga, Jami Pincavitch, Jaylyn Clark, Jeremy Richard Harper, Jessica  
348 Islam, Jin Ge, Joel Gagnier, Joel H. Saltz, Joel Saltz, Johanna Loomba, John Buse, Jomol Mathew, Joni  
349 L. Rutter, Julie A. McMurry, Justin Guinney, Justin Starren, Karen Crowley, Katie Rebecca Bradwell,  
350 Kellie M. Walters, Ken Wilkins, Kenneth R. Gersing, Kenrick Dwain Cato, Kimberly Murray, Kristin  
351 Kostka, Lavance Northington, Lee Allan Pyles, Leonie Misquitta, Lesley Cottrell, Lili Portilla, Mariam  
352 Deacy, Mark M. Bissell, Marshall Clark, Mary Emmett, Mary Morrison Saltz, Matvey B. Palchuk,  
353 Melissa A. Haendel, Meredith Adams, Meredith Temple-O'Connor, Michael G. Kurilla, Michele Morris,  
354 Nabeel Qureshi, Nasia Safdar, Nicole Garbarini, Noha Sharafeldin, Ofer Sadan, Patricia A. Francis,  
355 Penny Wung Burgoon, Peter Robinson, Philip R.O. Payne, Rafael Fuentes, Randeep Jawa, Rebecca  
356 Erwin-Cohen, Rena Patel, Richard A. Moffitt, Richard L. Zhu, Rishi Kamaleswaran, Robert Hurley,  
357 Robert T. Miller, Saiju Pyarajan, Sam G. Michael, Samuel Bozzette, Sandeep Mallipattu, Satyanarayana  
358 Vedula, Scott Chapman, Shawn T. O'Neil, Soko Setoguchi, Stephanie S. Hong, Steve Johnson, Tellen D.  
359 Bennett, Tiffany Callahan, Umit Topaloglu, Usman Sheikh, Valery Gordon, Vignesh Subbian, Warren A.  
360 Kibbe, Wendy Hernandez, Will Beasley, Will Cooper, William Hillegass, Xiaohan Tanner Zhang.  
361 Details of contributions available at [covid.cd2h.org/core-contributor](https://covid.cd2h.org/core-contributor)

362 Data Partners with Released Data

363 The following institutions whose data is released or pending:

364 Available: Advocate Health Care Network — UL1TR002389: The Institute for Translational Medicine  
365 (ITM) • Boston University Medical Campus — UL1TR001430: Boston University Clinical and  
366 Translational Science Institute • Brown University — U54GM115677: Advance Clinical Translational

367 Research (Advance-CTR) • Carilion Clinic — UL1TR003015: iTHRIV Integrated Translational health  
368 Research Institute of Virginia • Charleston Area Medical Center — U54GM104942: West Virginia  
369 Clinical and Translational Science Institute (WVCTSI) • Children’s Hospital Colorado —  
370 UL1TR002535: Colorado Clinical and Translational Sciences Institute • Columbia University Irving  
371 Medical Center — UL1TR001873: Irving Institute for Clinical and Translational Research • Duke  
372 University — UL1TR002553: Duke Clinical and Translational Science Institute • George Washington  
373 Children’s Research Institute — UL1TR001876: Clinical and Translational Science Institute at Children’s  
374 National (CTSA-CN) • George Washington University — UL1TR001876: Clinical and Translational  
375 Science Institute at Children’s National (CTSA-CN) • Indiana University School of Medicine —  
376 UL1TR002529: Indiana Clinical and Translational Science Institute • Johns Hopkins University —  
377 UL1TR003098: Johns Hopkins Institute for Clinical and Translational Research • Loyola Medicine —  
378 Loyola University Medical Center • Loyola University Medical Center — UL1TR002389: The Institute  
379 for Translational Medicine (ITM) • Maine Medical Center — U54GM115516: Northern New England  
380 Clinical & Translational Research (NNE-CTR) Network • Massachusetts General Brigham —  
381 UL1TR002541: Harvard Catalyst • Mayo Clinic Rochester — UL1TR002377: Mayo Clinic Center for  
382 Clinical and Translational Science (CCaTS) • Medical University of South Carolina — UL1TR001450:  
383 South Carolina Clinical & Translational Research Institute (SCTR) • Montefiore Medical Center —  
384 UL1TR002556: Institute for Clinical and Translational Research at Einstein and Montefiore • Nemours  
385 — U54GM104941: Delaware CTR ACCEL Program • NorthShore University HealthSystem —  
386 UL1TR002389: The Institute for Translational Medicine (ITM) • Northwestern University at Chicago —  
387 UL1TR001422: Northwestern University Clinical and Translational Science Institute (NUCATS) •  
388 OCHIN — INV-018455: Bill and Melinda Gates Foundation grant to Sage Bionetworks • Oregon Health  
389 & Science University — UL1TR002369: Oregon Clinical and Translational Research Institute • Penn  
390 State Health Milton S. Hershey Medical Center — UL1TR002014: Penn State Clinical and Translational  
391 Science Institute • Rush University Medical Center — UL1TR002389: The Institute for Translational  
392 Medicine (ITM) • Rutgers, The State University of New Jersey — UL1TR003017: New Jersey Alliance  
393 for Clinical and Translational Science • Stony Brook University — U24TR002306 • The Ohio State  
394 University — UL1TR002733: Center for Clinical and Translational Science • The State University of  
395 New York at Buffalo — UL1TR001412: Clinical and Translational Science Institute • The University of  
396 Chicago — UL1TR002389: The Institute for Translational Medicine (ITM) • The University of Iowa —  
397 UL1TR002537: Institute for Clinical and Translational Science • The University of Miami Leonard M.  
398 Miller School of Medicine — UL1TR002736: University of Miami Clinical and Translational Science  
399 Institute • The University of Michigan at Ann Arbor — UL1TR002240: Michigan Institute for Clinical  
400 and Health Research • The University of Texas Health Science Center at Houston — UL1TR003167:  
401 Center for Clinical and Translational Sciences (CCTS) • The University of Texas Medical Branch at  
402 Galveston — UL1TR001439: The Institute for Translational Sciences • The University of Utah —  
403 UL1TR002538: Uhealth Center for Clinical and Translational Science • Tufts Medical Center —  
404 UL1TR002544: Tufts Clinical and Translational Science Institute • Tulane University — UL1TR003096:  
405 Center for Clinical and Translational Science • University Medical Center New Orleans —  
406 U54GM104940: Louisiana Clinical and Translational Science (LA CaTS) Center • University of Alabama  
407 at Birmingham — UL1TR003096: Center for Clinical and Translational Science • University of Arkansas  
408 for Medical Sciences — UL1TR003107: UAMS Translational Research Institute • University of  
409 Cincinnati — UL1TR001425: Center for Clinical and Translational Science and Training • University of  
410 Colorado Denver, Anschutz Medical Campus — UL1TR002535: Colorado Clinical and Translational  
411 Sciences Institute • University of Illinois at Chicago — UL1TR002003: UIC Center for Clinical and  
412 Translational Science • University of Kansas Medical Center — UL1TR002366: Frontiers: University of



413 Kansas Clinical and Translational Science Institute • University of Kentucky — UL1TR001998: UK  
414 Center for Clinical and Translational Science • University of Massachusetts Medical School Worcester —  
415 UL1TR001453: The UMass Center for Clinical and Translational Science (UMCCTS) • University of  
416 Minnesota — UL1TR002494: Clinical and Translational Science Institute • University of Mississippi  
417 Medical Center — U54GM115428: Mississippi Center for Clinical and Translational Research (CCTR) •  
418 University of Nebraska Medical Center — U54GM115458: Great Plains IDeA-Clinical & Translational  
419 Research • University of North Carolina at Chapel Hill — UL1TR002489: North Carolina Translational  
420 and Clinical Science Institute • University of Oklahoma Health Sciences Center — U54GM104938:  
421 Oklahoma Clinical and Translational Science Institute (OCTSI) • University of Rochester —  
422 UL1TR002001: UR Clinical & Translational Science Institute • University of Southern California —  
423 UL1TR001855: The Southern California Clinical and Translational Science Institute (SC CTSI) •  
424 University of Vermont — U54GM115516: Northern New England Clinical & Translational Research  
425 (NNE-CTR) Network • University of Virginia — UL1TR003015: iTHRIV Integrated Translational health  
426 Research Institute of Virginia • University of Washington — UL1TR002319: Institute of Translational  
427 Health Sciences • University of Wisconsin-Madison — UL1TR002373: UW Institute for Clinical and  
428 Translational Research • Vanderbilt University Medical Center — UL1TR002243: Vanderbilt Institute  
429 for Clinical and Translational Research • Virginia Commonwealth University — UL1TR002649: C.  
430 Kenneth and Dianne Wright Center for Clinical and Translational Research • Wake Forest University  
431 Health Sciences — UL1TR001420: Wake Forest Clinical and Translational Science Institute •  
432 Washington University in St. Louis — UL1TR002345: Institute of Clinical and Translational Sciences •  
433 Weill Medical College of Cornell University — UL1TR002384: Weill Cornell Medicine Clinical and  
434 Translational Science Center • West Virginia University — U54GM104942: West Virginia Clinical and  
435 Translational Science Institute (WVCTSI)

436 Submitted: Icahn School of Medicine at Mount Sinai — UL1TR001433: ConduITS Institute for  
437 Translational Sciences • The University of Texas Health Science Center at Tyler — UL1TR003167:  
438 Center for Clinical and Translational Sciences (CCTS) • University of California, Davis —  
439 UL1TR001860: UC Davis Health Clinical and Translational Science Center • University of California,  
440 Irvine — UL1TR001414: The UC Irvine Institute for Clinical and Translational Science (ICTS) •  
441 University of California, Los Angeles — UL1TR001881: UCLA Clinical Translational Science Institute •  
442 University of California, San Diego — UL1TR001442: Altman Clinical and Translational Research  
443 Institute • University of California, San Francisco — UL1TR001872: UCSF Clinical and Translational  
444 Science Institute

445 Pending: Arkansas Children’s Hospital — UL1TR003107: UAMS Translational Research Institute •  
446 Baylor College of Medicine — None (Voluntary) • Children’s Hospital of Philadelphia —  
447 UL1TR001878: Institute for Translational Medicine and Therapeutics • Cincinnati Children’s Hospital  
448 Medical Center — UL1TR001425: Center for Clinical and Translational Science and Training • Emory  
449 University — UL1TR002378: Georgia Clinical and Translational Science Alliance • HonorHealth —  
450 None (Voluntary) • Loyola University Chicago — UL1TR002389: The Institute for Translational  
451 Medicine (ITM) • Medical College of Wisconsin — UL1TR001436: Clinical and Translational Science  
452 Institute of Southeast Wisconsin • MedStar Health Research Institute — UL1TR001409: The  
453 Georgetown-Howard Universities Center for Clinical and Translational Science (GHUCCTS) •  
454 MetroHealth — None (Voluntary) • Montana State University — U54GM115371: American  
455 Indian/Alaska Native CTR • NYU Langone Medical Center — UL1TR001445: Langone Health’s  
456 Clinical and Translational Science Institute • Ochsner Medical Center — U54GM104940: Louisiana  
457 Clinical and Translational Science (LA CaTS) Center • Regenstrief Institute — UL1TR002529: Indiana

458 Clinical and Translational Science Institute • Sanford Research — None (Voluntary) • Stanford  
459 University — UL1TR003142: Spectrum: The Stanford Center for Clinical and Translational Research and  
460 Education • The Rockefeller University — UL1TR001866: Center for Clinical and Translational Science  
461 • The Scripps Research Institute — UL1TR002550: Scripps Research Translational Institute • University  
462 of Florida — UL1TR001427: UF Clinical and Translational Science Institute • University of New Mexico  
463 Health Sciences Center — UL1TR001449: University of New Mexico Clinical and Translational Science  
464 Center • University of Texas Health Science Center at San Antonio — UL1TR002645: Institute for  
465 Integration of Medicine and Science • Yale New Haven Hospital — UL1TR001863: Yale Center for  
466 Clinical Investigation

467 **References**

- 468 Bennett, T. D., Moffitt, R. A., Hajagos, J. G., Amor, B., Anand, A., Bissell, M. M., Bradwell, K. R.,  
469 Bremer, C., Byrd, J. B., Denham, A., DeWitt, P. E., Gabriel, D., Garibaldi, B. T., Girvin, A. T.,  
470 Guinney, J., Hill, E. L., Hong, S. S., Jimenez, H., Kavuluru, R., ... National COVID Cohort  
471 Collaborative (N3C) Consortium. (2021). Clinical Characterization and Prediction of Clinical  
472 Severity of SARS-CoV-2 Infection Among US Adults Using Data From the US National COVID  
473 Cohort Collaborative. *JAMA Network Open*, 4(7), e2116901.  
474 <https://doi.org/10.1001/jamanetworkopen.2021.16901>
- 475 Blacketer, C. (2021, January 11). *Chapter 4 The Common Data Model*. The Book of OHDSI.  
476 <https://ohdsi.github.io/TheBookOfOhdsi/>
- 477 CDC. (2022, June 22). *Nearly One in Five American Adults Who Have Had COVID-19 Still Have “Long*  
478 *COVID.”* [https://www.cdc.gov/nchs/pressroom/nchs\\_press\\_releases/2022/20220622.htm](https://www.cdc.gov/nchs/pressroom/nchs_press_releases/2022/20220622.htm)
- 479 CDC. (2023, January 4). *Long COVID - Household Pulse Survey—COVID-19*.  
480 <https://www.cdc.gov/nchs/covid19/pulse/long-covid.htm>
- 481 CDC NCHS. (2022, June 22). *Nearly One in Five American Adults Who Have Had COVID-19 Still Have*  
482 *“Long COVID.”* [https://www.cdc.gov/nchs/pressroom/nchs\\_press\\_releases/2022/20220622.htm](https://www.cdc.gov/nchs/pressroom/nchs_press_releases/2022/20220622.htm)
- 483 Crook, H., Raza, S., Nowell, J., Young, M., & Edison, P. (2021). Long covid—Mechanisms, risk factors,  
484 and management. *BMJ*, 374, n1648. <https://doi.org/10.1136/bmj.n1648>
- 485 Cutler, D. (2022, July 22). *The Economic Cost of Long COVID: An Update*.  
486 [https://scholar.harvard.edu/files/cutler/files/long\\_covid\\_update\\_7-22.pdf](https://scholar.harvard.edu/files/cutler/files/long_covid_update_7-22.pdf)
- 487 Cutler, D. M., & Summers, L. H. (2020). The COVID-19 Pandemic and the \$16 Trillion Virus. *JAMA*,  
488 324(15), 1495–1496. <https://doi.org/10.1001/jama.2020.19759>
- 489 Davis, H. E., Assaf, G. S., McCorkell, L., Wei, H., Low, R. J., Re'em, Y., Redfield, S., Austin, J. P., &  
490 Akrami, A. (2021). Characterizing long COVID in an international cohort: 7 months of symptoms  
491 and their impact. *EClinicalMedicine*, 38. <https://doi.org/10.1016/j.eclinm.2021.101019>

- 492 Garg, M., Maralakunte, M., Garg, S., Dhooria, S., Sehgal, I., Bhalla, A. S., Vijayvergiya, R., Grover, S.,  
493 Bhatia, V., Jagia, P., Bhalla, A., Suri, V., Goyal, M., Agarwal, R., Puri, G. D., & Sandhu, M. S.  
494 (2021). The Conundrum of ‘Long-COVID-19’: A Narrative Review. *International Journal of*  
495 *General Medicine*, 14, 2491–2506. <https://doi.org/10.2147/IJGM.S316708>
- 496 Glasheen, W. P., Cordier, T., Gumpina, R., Haugh, G., Davis, J., & Renda, A. (2019). Charlson  
497 Comorbidity Index: ICD-9 Update and ICD-10 Translation. *American Health & Drug Benefits*,  
498 12(4), Article 4.
- 499 Global Burden of Disease Long COVID Collaborators. (2022). Estimated Global Proportions of  
500 Individuals With Persistent Fatigue, Cognitive, and Respiratory Symptom Clusters Following  
501 Symptomatic COVID-19 in 2020 and 2021. *JAMA*, 328(16), 1604–1615.  
502 <https://doi.org/10.1001/jama.2022.18931>
- 503 Haendel, M. A., Chute, C. G., Bennett, T. D., Eichmann, D. A., Guinney, J., Kibbe, W. A., Payne, P. R.  
504 O., Pfaff, E. R., Robinson, P. N., Saltz, J. H., Spratt, H., Suver, C., Wilbanks, J., Wilcox, A. B.,  
505 Williams, A. E., Wu, C., Blacketer, C., Bradford, R. L., Cimino, J. J., ... N3C Consortium.  
506 (2021). The National COVID Cohort Collaborative (N3C): Rationale, design, infrastructure, and  
507 deployment. *Journal of the American Medical Informatics Association: JAMIA*, 28(3), 427–443.  
508 <https://doi.org/10.1093/jamia/ocaa196>
- 509 Herman, E., Shih, E., & Cheng, A. (2022). Long COVID: Rapid Evidence Review. *American Family*  
510 *Physician*, 106(5), 523–532.
- 511 Klaassen, F., Chitwood, M. H., Cohen, T., Pitzer, V. E., Russi, M., Swartwood, N. A., Salomon, J. A., &  
512 Menzies, N. A. (2022). *Changes in population immunity against infection and severe disease*  
513 *from SARS-CoV-2 Omicron variants in the United States between December 2021 and November*  
514 *2022* (p. 2022.11.19.22282525). medRxiv. <https://doi.org/10.1101/2022.11.19.22282525>
- 515 Mancini, D. M., Brunjes, D. L., Lala, A., Trivieri, M. G., Contreras, J. P., & Natelson, B. H. (2021). Use  
516 of Cardiopulmonary Stress Testing for Patients With Unexplained Dyspnea Post–Coronavirus  
517 Disease. *JACC: Heart Failure*, 9(12), 927–937. <https://doi.org/10.1016/j.jchf.2021.10.002>

518 Marshall, J. C., Murthy, S., Diaz, J., Adhikari, N. K., Angus, D. C., Arabi, Y. M., Baillie, K., Bauer, M.,  
519 Berry, S., Blackwood, B., Bonten, M., Bozza, F., Brunkhorst, F., Cheng, A., Clarke, M., Dat, V.  
520 Q., de Jong, M., Denholm, J., Derde, L., ... Zhang, J. (2020). A minimal common outcome  
521 measure set for COVID-19 clinical research. *The Lancet Infectious Diseases*, 20(8), e192–e197.  
522 [https://doi.org/10.1016/S1473-3099\(20\)30483-7](https://doi.org/10.1016/S1473-3099(20)30483-7)

523 Nabavi, N. (2020). Long covid: How to define it and how to manage it. *BMJ*, 370, m3489.  
524 <https://doi.org/10.1136/bmj.m3489>

525 Nasserie, T., Hittle, M., & Goodman, S. N. (2021). Assessment of the Frequency and Variety of  
526 Persistent Symptoms Among Patients With COVID-19: A Systematic Review. *JAMA Network*  
527 *Open*, 4(5), e2111417. <https://doi.org/10.1001/jamanetworkopen.2021.11417>

528 Nittas, V., Gao, M., West, E. A., Ballouz, T., Menges, D., Wulf Hanson, S., & Puhan, M. A. (2022). Long  
529 COVID Through a Public Health Lens: An Umbrella Review. *Public Health Reviews*, 43,  
530 1604501. <https://doi.org/10.3389/phrs.2022.1604501>

531 Observational Health Data Sciences and Informatics. (2018). *COVID-19 Clinical Data Warehouse Data*  
532 *Dictionary Based on OMOP Common Data Model Specifications Version 5.3*. National Center  
533 for Advancing Translational Sciences (NCATS).  
534 [https://ncats.nih.gov/files/OMOP\\_CDM\\_COVID.pdf](https://ncats.nih.gov/files/OMOP_CDM_COVID.pdf)

535 Patient Led Research Collaborative. (2023). *About the Patient-Led Research Collaborative*. Patient Led  
536 Research Collaborative – for Long COVID. <https://patientresearchcovid19.com/>

537 Pfaff, E. R. (2022, March 11). *Latest Phenotype* [GitHub]. National-COVID-Cohort-Collaborative.  
538 [https://github.com/National-COVID-Cohort-](https://github.com/National-COVID-Cohort-Collaborative/Phenotype_Data_Acquisition/wiki/Latest-Phenotype)  
539 [Collaborative/Phenotype\\_Data\\_Acquisition/wiki/Latest-Phenotype](https://github.com/National-COVID-Cohort-Collaborative/Phenotype_Data_Acquisition/wiki/Latest-Phenotype)

540 Sudre, C. H., Murray, B., Varsavsky, T., Graham, M. S., Penfold, R. S., Bowyer, R. C., Pujol, J. C.,  
541 Klaser, K., Antonelli, M., Canas, L. S., Molteni, E., Modat, M., Jorge Cardoso, M., May, A.,  
542 Ganesh, S., Davies, R., Nguyen, L. H., Drew, D. A., Astley, C. M., ... Steves, C. J. (2021).

543           Attributes and predictors of long COVID. *Nature Medicine*, 27(4), Article 4.  
544           <https://doi.org/10.1038/s41591-021-01292-y>

545    Tsampasian, V., Elghazaly, H., Chattopadhyay, R., Debski, M., Naing, T. K. P., Garg, P., Clark, A.,  
546           Ntatsaki, E., & Vassiliou, V. S. (2023). Risk Factors Associated With Post–COVID-19  
547           Condition: A Systematic Review and Meta-analysis. *JAMA Internal Medicine*.  
548           <https://doi.org/10.1001/jamainternmed.2023.0750>

549    World Health Organization. (2021, October 6). *A clinical case definition of post COVID-19 condition by*  
550           *a Delphi consensus, 6 October 2021*. [https://www.who.int/publications-detail-redirect/WHO-](https://www.who.int/publications-detail-redirect/WHO-2019-nCoV-Post_COVID-19_condition-Clinical_case_definition-2021.1)  
551           2019-nCoV-Post\_COVID-19\_condition-Clinical\_case\_definition-2021.1  
552

553 **Tables**  
 554 **Table 1: Analytic Sample**

|                                     | Overall N (%)     | Cognitive Symptom Cluster |                   | Fatigue Symptom Cluster |                   | Respiratory Symptom Cluster |                   |
|-------------------------------------|-------------------|---------------------------|-------------------|-------------------------|-------------------|-----------------------------|-------------------|
|                                     |                   | Positive N (%)            | Negative N (%)    | Positive N (%)          | Negative N (%)    | Positive N (%)              | Negative N (%)    |
| <b>Total</b>                        | 1,890,367         | 5,294 (0.3%)              | 1,885,073 (99.7%) | 107,565 (5.4%)          | 1,782,802 (94.3%) | 58,369 (3.2%)               | 1,831,998 (96.9%) |
| <b>Age</b>                          | 41.2 (SD: 20.88)  | 61.1 (SD: 17.3)           | 41.1 (SD: 20.86)  | 43.3 (SD: 19.47)        | 41.0 (SD: 20.96)  | 45.4 (SD: 22.62)            | 41.0 (SD: 20.81)  |
| <b>Age group:</b>                   |                   |                           |                   |                         |                   |                             |                   |
| 0-9                                 | 123,339 (6.5%)    | < 20 (<0.1%)              | 123,321 (100%)    | 2,739 (2.2%)            | 120,600 (97.8%)   | 5,304 (4.2%)                | 118,035 (95.7%)   |
| 10-19                               | 195,809 (10.4%)   | < 80 (<0.1%)              | 195,731 (100%)    | 9,941 (4.8%)            | 185,868 (94.9%)   | 3,957 (2.1%)                | 191,852 (98%)     |
| 20-29                               | 288,892 (15.3%)   | 223 (0.1%)                | 288,669 (99.9%)   | 16,984 (5.6%)           | 271,908 (94.1%)   | 5,766 (2.1%)                | 283,126 (98%)     |
| 30-39                               | 290,618 (15.4%)   | 323 (0.1%)                | 290,295 (99.9%)   | 18,235 (5.9%)           | 272,383 (93.7%)   | 6,782 (2.4%)                | 283,836 (97.7%)   |
| 40-49                               | 275,758 (14.6%)   | 520 (0.2%)                | 275,238 (99.8%)   | 17,221 (5.9%)           | 258,537 (93.8%)   | 7,801 (2.9%)                | 267,957 (97.2%)   |
| 50-59                               | 282,046 (14.9%)   | 863 (0.3%)                | 281,183 (99.7%)   | 16,788 (5.6%)           | 265,258 (94%)     | 9,749 (3.5%)                | 272,297 (96.5%)   |
| 60-69                               | 227,319 (12%)     | 1,161 (0.5%)              | 226,158 (99.5%)   | 13,325 (5.6%)           | 213,994 (94.1%)   | 9,604 (4.3%)                | 217,715 (95.8%)   |
| 70-79                               | 132,324 (7%)      | 1,130 (0.8%)              | 131,194 (99.1%)   | 8,050 (5.8%)            | 124,274 (93.9%)   | 6,342 (4.9%)                | 125,982 (95.2%)   |
| 80+                                 | 74,259 (3.9%)     | 978 (1.3%)                | 73,281 (98.7%)    | 4,282 (5.5%)            | 69,977 (94.2%)    | 3,064 (4.2%)                | 71,195 (95.9%)    |
| <b>Sex:</b>                         |                   |                           |                   |                         |                   |                             |                   |
| Female                              | 1,056,464 (55.9%) | 3,136 (0.3%)              | 1,053,328 (99.7%) | 74,082 (6.6%)           | 982,382 (93%)     | 34,849 (3.4%)               | 1,021,615 (96.7%) |
| Male                                | 830,182 (43.9%)   | 2,154† (0.3%)             | 828,031 (99.7%)   | 33,337 (3.9%)           | 796,845 (96%)     | 23,418 (2.9%)               | 806,764 (97.2%)   |
| Other                               | 3,721 (0.2%)      | < 20 (0.5%)               | 3,714 (99.5%)     | 146 (3.8%)              | 3,575 (96.1%)     | 102 (2.8%)                  | 3,619 (97.3%)     |
| <b>Race:</b>                        |                   |                           |                   |                         |                   |                             |                   |
| White                               | 1,281,718 (67.8%) | 3,970 (0.3%)              | 1,277,748 (99.7%) | 77,985 (5.8%)           | 1,203,733 (93.9%) | 40,849 (3.3%)               | 1,240,869 (96.8%) |
| Black or African American           | 265,116 (14%)     | 713 (0.3%)                | 264,403 (99.7%)   | 15,186 (5.4%)           | 249,930 (94.3%)   | 9,771 (3.8%)                | 255,345 (96.3%)   |
| Asian                               | 37,255 (2%)       | 85 (0.2%)                 | 37,170 (99.8%)    | 1,574 (4.1%)            | 35,681 (95.8%)    | 918 (2.5%)                  | 36,337 (97.5%)    |
| Native Hawaiian or Pacific Islander | 2,804 (0.1%)      | < 20 (0.7%)               | 2,802 (99.3%)     | 114 (3.9%)              | 2,690 (95.9%)     | 61 (2.2%)                   | 2,743 (97.8%)     |
| Other                               | 17,307 (0.9%)     | < 30 (0.2%)               | 17,279 (99.8%)    | 835 (4.6%)              | 16,472 (95.2%)    | 533 (3.1%)                  | 16,774 (96.9%)    |

**White Paper:** Can longitudinal electronic health record data identify patients at higher risk of developing long COVID?

|                              |                   |                |                   |                |                   |                |                   |
|------------------------------|-------------------|----------------|-------------------|----------------|-------------------|----------------|-------------------|
| Missing/Unknown              | 286,167 (15.1%)   | 496 (0.2%)     | 285,671 (99.8%)   | 11,871 (4%)    | 274,296 (95.9%)   | 6,237 (2.2%)   | 279,930 (97.8%)   |
| <b>Ethnicity:</b>            |                   |                |                   |                |                   |                |                   |
| Hispanic or Latino           | 254,420 (13.5%)   | 497 (0.2%)     | 253,923 (99.8%)   | 13,258 (5%)    | 241,162 (94.8%)   | 6,464 (2.6%)   | 247,956 (97.5%)   |
| Not Hispanic or Latino       | 1,444,487 (76.4%) | 4,374 (0.3%)   | 1,440,113 (99.7%) | 86,489 (5.7%)  | 1,357,998 (94%)   | 47,998 (3.4%)  | 1,396,489 (96.7%) |
| Ethnicity Missing or Unknown | 191,460 (10.1%)   | 423 (0.2%)     | 191,037 (99.8%)   | 7,818 (3.9%)   | 183,642 (95.9%)   | 3,907 (2.1%)   | 187,553 (98%)     |
| <b>COVID-19 vaccination:</b> |                   |                |                   |                |                   |                |                   |
| Yes                          | 40,496 (2.1%)     | 225 (0.6%)     | 40,271 (99.4%)    | 3,701 (8.4%)   | 36,795 (90.9%)    | 1,765 (4.6%)   | 38,731 (95.6%)    |
| No                           | 1,849,871 (97.9%) | 5,069 (0.3%)   | 1,844,802 (99.7%) | 103,864 (5.3%) | 1,746,007 (94.4%) | 56,604 (3.1%)  | 1,793,267 (96.9%) |
| <b>Smoking status:</b>       |                   |                |                   |                |                   |                |                   |
| Current or former smoker     | 1,628,099 (86.1%) | 4,138 (0.3%)   | 1,623,961 (99.7%) | 86,832 (5.1%)  | 1,541,267 (94.7%) | 46,208 (2.9%)  | 1,581,891 (97.2%) |
| Non-smoker                   | 262,268 (13.9%)   | 1,156 (0.4%)   | 261,112 (99.6%)   | 20,733 (7.4%)  | 241,535 (92.1%)   | 12,161 (4.8%)  | 250,107 (95.4%)   |
| <b>Hypertension</b>          | 7,916 (0.4%)      | 69 (0.9%)      | 7,847 (99.1%)     | 804 (9.3%)     | 7,112 (89.8%)     | 440 (5.8%)     | 7,476 (94.4%)     |
| <b>Obesity</b>               | 170,610 (9%)      | 1,094 (0.6%)   | 169,516 (99.4%)   | 17,708 (9.5%)  | 152,902 (89.6%)   | 9,560 (5.9%)   | 161,050 (94.4%)   |
| <b>Immunocompromised</b>     | 207 (<0.1%)       | < 20 (8.8%)    | 203‡ (91%)        | 26 (11.4%)     | 181 (87.4%)       | < 20 (10%)     | 189‡ (90.4%)      |
| <b>Pregnant</b>              | 3,534 (0.2%)      | < 20 (0.6%)    | 3,537‡ (99.4%)    | 368 (9.4%)     | 3,166 (89.6%)     | 108 (3.3%)     | 3,426 (96.9%)     |
| <b>CCI Score</b>             | 0.7 (SD: 1.7)     | 2.7 (SD: 3.13) | 0.7 (SD: 1.69)    | 1.3 (SD: 2.31) | 0.7 (SD: 1.65)    | 1.5 (SD: 2.45) | 0.7 (SD: 1.66)    |

555 ‡ To comply with N3C policy, counts below 20 are displayed as < 20, and in this case, additional values must be skewed by up to 5 in order to  
556 render it impossible to back-calculate precise counts fewer than 20 in the ‘sex: other’, immunocompromised, and pregnancy categories.

557 Abbreviations: SD: standard deviation; CCI: Charlson Comorbidity Index



558 Table 2: Model Performance Results

| Long COVID Outcome | Model Type    | Performance Metric | Train Sample | Test Sample |
|--------------------|---------------|--------------------|--------------|-------------|
| Respiratory        | Logistic      | AUC                | 0.610        | 0.612       |
|                    |               | F1                 | 0.586        | 0.093       |
|                    |               | Accuracy           | 0.610        | 0.665       |
|                    |               | Precision          | 0.624        | 0.051       |
|                    |               | Sensitivity        | 0.552        | 0.556       |
|                    |               | Specificity        | 0.667        | 0.669       |
|                    | Random Forest | AUC                | 0.617        | 0.619       |
|                    |               | F1                 | 0.594        | 0.096       |
|                    |               | Accuracy           | 0.617        | 0.67        |
|                    |               | Precision          | 0.632        | 0.052       |
|                    |               | Sensitivity        | 0.56         | 0.565       |
|                    |               | Specificity        | 0.674        | 0.674       |
| Fatigue            | Logistic      | AUC                | 0.608        | 0.608       |
|                    |               | F1                 | 0.618        | 0.148       |
|                    |               | Accuracy           | 0.608        | 0.587       |
|                    |               | Precision          | 0.603        | 0.084       |
|                    |               | Sensitivity        | 0.632        | 0.631       |
|                    |               | Specificity        | 0.584        | 0.584       |
|                    | Random Forest | AUC                | 0.604        | 0.604       |
|                    |               | F1                 | 0.58         | 0.153       |
|                    |               | Accuracy           | 0.604        | 0.649       |
|                    |               | Precision          | 0.617        | 0.089       |
|                    |               | Sensitivity        | 0.552        | 0.553       |
|                    |               | Specificity        | 0.656        | 0.655       |
| Cognitive          | Logistic      | AUC                | 0.731        | 0.732       |
|                    |               | F1                 | 0.726        | 0.016       |
|                    |               | Accuracy           | 0.731        | 0.746       |
|                    |               | Precision          | 0.741        | 0.008       |
|                    |               | Sensitivity        | 0.712        | 0.719       |
|                    |               | Specificity        | 0.75         | 0.746       |
|                    | Random Forest | AUC                | 0.734        | 0.732       |
|                    |               | F1                 | 0.733        | 0.015       |
|                    |               | Accuracy           | 0.734        | 0.732       |
|                    |               | Precision          | 0.736        | 0.008       |
|                    |               | Sensitivity        | 0.731        | 0.733       |
|                    |               | Specificity        | 0.737        | 0.732       |

559 Abbreviations: AUC: Area under the curve

560 Table 3: Coefficient Values for the Binary Logistic Regression Models

|                             | Coefficient                         | Cognitive | Fatigue   | Respiratory |
|-----------------------------|-------------------------------------|-----------|-----------|-------------|
| <b>Age</b>                  | 0-9                                 | -1.807    | -0.855    | 0.783       |
|                             | 10-19                               | -0.870    | -0.099    | -0.047      |
|                             | 20-29                               | -0.303    | -0.009    | -0.114      |
|                             | 30-39                               | Reference | Reference | Reference   |
|                             | 40-49                               | 0.693     | -0.090    | 0.105       |
|                             | 50-59                               | 0.713     | -0.150    | 0.252       |
|                             | 60-69                               | 1.082     | -0.275    | 0.362       |
|                             | 70-79                               | 1.548     | -0.340    | 0.410       |
|                             | 80+                                 | 1.955     | -0.355    | 0.328       |
| <b>Sex</b>                  | Female                              | Reference | Reference | Reference   |
|                             | Male                                | -0.211    | -0.586    | -0.215      |
|                             | Other                               | -0.033    | -0.098    | 0.101       |
| <b>Race</b>                 | White                               | Reference | Reference | Reference   |
|                             | Black or African American           | -0.158    | -0.219    | 0.051       |
|                             | Asian                               | 0.061     | -0.359    | -0.285      |
|                             | Native Hawaiian or Pacific Islander | -0.697    | -0.477    | -0.278      |
|                             | Other                               | -0.268    | -0.168    | -0.072      |
|                             | Missing/Unknown                     | -0.360    | -0.336    | -0.262      |
| <b>Ethnicity</b>            | Not Hispanic or Latino              | Reference | Reference | Reference   |
|                             | Hispanic or Latino                  | -0.082    | -0.018    | -0.128      |
|                             | Ethnicity Missing or Unknown        | -0.084    | -0.204    | -0.323      |
| <b>COVID-19 vaccination</b> | No                                  | Reference | Reference | Reference   |
|                             | Yes                                 | 0.106     | 0.285     | 0.138       |
| <b>Smoking status:</b>      | Non-smoker                          | Reference | Reference | Reference   |
|                             | Current or Former smoker            | 0.436     | 0.347     | 0.415       |
| <b>Hypertension</b>         | No                                  | Reference | Reference | Reference   |
|                             | Yes                                 | 0.131     | 0.255     | 0.034       |
| <b>Obesity</b>              | No                                  | Reference | Reference | Reference   |
|                             | Yes                                 | 0.429     | 0.423     | 0.383       |
| <b>Immunocompromised</b>    | No                                  | Reference | Reference | Reference   |
|                             | Yes                                 | 0.042     | 0.073     | -0.198      |
| <b>Pregnant</b>             | No                                  | Reference | Reference | Reference   |
|                             | Yes                                 | -0.257    | 0.266     | 0.001       |
| <b>CCI Score</b>            |                                     | 0.252     | 0.156     | 0.161       |

561 Abbreviations: CCI: Charlson Comorbidity Index

562 Table 4: Impurity-Based Variable Importance Scores for the Random Forest Models

| Variable Importance Score   |                                     | Cognitive | Fatigue   | Respiratory |
|-----------------------------|-------------------------------------|-----------|-----------|-------------|
| <b>Age</b>                  | 0-9                                 | 0.050     | 0.109     | 0.038       |
|                             | 10-19                               | 0.082     | 0.003     | 0.031       |
|                             | 20-29                               | 0.077     | 0.003     | 0.066       |
|                             | 30-39                               | Reference | Reference | Reference   |
|                             | 40-49                               | 0.003     | 0.001     | 0.003       |
|                             | 50-59                               | 0.004     | 0.001     | 0.003       |
|                             | 60-69                               | 0.037     | 0.002     | 0.025       |
|                             | 70-79                               | 0.109     | 0.002     | 0.035       |
|                             | 80+                                 | 0.093     | 0.001     | 0.006       |
| <b>Sex</b>                  | Female                              | Reference | Reference | Reference   |
|                             | Male                                | 0.004     | 0.242     | 0.012       |
|                             | Other                               | 0.001     | 0.001     | 0.001       |
| <b>Race</b>                 | White                               | Reference | Reference | Reference   |
|                             | Black or African American           | 0.003     | 0.002     | 0.008       |
|                             | Asian                               | 0.001     | 0.003     | 0.002       |
|                             | Native Hawaiian or Pacific Islander | 0.000     | 0.000     | 0.000       |
|                             | Other                               | 0.001     | 0.001     | 0.001       |
|                             | Missing/Unknown                     | 0.014     | 0.038     | 0.047       |
| <b>Ethnicity</b>            | Not Hispanic or Latino              | Reference | Reference | Reference   |
|                             | Hispanic or Latino                  | 0.007     | 0.004     | 0.008       |
|                             | Ethnicity Missing or Unknown        | 0.003     | 0.023     | 0.029       |
| <b>COVID-19 vaccination</b> | No                                  | Reference | Reference | Reference   |
|                             | Yes                                 | 0.004     | 0.012     | 0.004       |
| <b>Smoking status:</b>      | Non-smoker                          | Reference | Reference | Reference   |
|                             | Current or Former smoker            | 0.019     | 0.060     | 0.099       |
| <b>Hypertension</b>         | No                                  | Reference | Reference | Reference   |
|                             | Yes                                 | 0.001     | 0.003     | 0.001       |
| <b>Obesity</b>              | No                                  | Reference | Reference | Reference   |
|                             | Yes                                 | 0.043     | 0.136     | 0.120       |
| <b>Immunocompromised</b>    | No                                  | Reference | Reference | Reference   |
|                             | Yes                                 | 0.000     | 0.000     | 0.000       |
| <b>Pregnant</b>             | No                                  | Reference | Reference | Reference   |
|                             | Yes                                 | 0.000     | 0.001     | 0.001       |
| <b>CCI Score</b>            |                                     | 0.442     | 0.351     | 0.461       |

563 Abbreviations: CCI: Charlson Comorbidity Index

564 **Appendix**

565 **Appendix A1: Covariate OMOP Codes**

566 Table of OMOP Codes used for covariate creation

| Covariate    | codeset_id | concept_id | concepts_set_name                    | is_most_recent_version | version | concept_name          | archive |
|--------------|------------|------------|--------------------------------------|------------------------|---------|-----------------------|---------|
| hypertension | 93041866   | 316866     | ARIScience - Hypertension - JA       | FALSE                  | 1       | Hypertensive disorder | FALSE   |
| hypertension | 343580642  | 316866     | Atlas 807 N3C Essential Hypertension | TRUE                   | 2       | Hypertensive disorder | FALSE   |
| hypertension | 779214702  | 316866     | Hypertension_Elixhauser_UC           | TRUE                   | 1       | Hypertensive disorder | FALSE   |
| hypertension | 859645468  | 316866     | hypertensive-disorder-107            | TRUE                   | 1       | Hypertensive disorder | FALSE   |
| hypertension | 972807308  | 316866     | Pre-existing hypertension pregnancy  | TRUE                   | 2       | Hypertensive disorder | FALSE   |
| hypertension | 146797511  | 316866     | [LEGEND]Hypertension                 | TRUE                   | 1       | Hypertensive disorder | FALSE   |
| hypertension | 179876469  | 316866     | hypertension-bdc                     | TRUE                   | 2       | Hypertensive disorder | FALSE   |
| hypertension | 534314902  | 316866     | [Cardioonc] All CV Disease           | TRUE                   | 1       | Hypertensive disorder | FALSE   |
| hypertension | 119899917  | 316866     | [RHDT] Hypertension                  | TRUE                   | 2       | Hypertensive disorder | FALSE   |
| hypertension | 862684480  | 316866     | hypertension-bdc                     | FALSE                  | 1       | Hypertensive disorder | FALSE   |
| hypertension | 142602231  | 316866     | Hypertensive disorder                | TRUE                   | 1       | Hypertensive disorder | FALSE   |
| hypertension | 378884384  | 316866     | Hypertension_wide                    | TRUE                   | 1       | Hypertensive disorder | FALSE   |
| hypertension | 537394386  | 316866     | jr_hypertension                      | TRUE                   | 1       | Hypertensive disorder | FALSE   |
| hypertension | 799270877  | 316866     | ARIScience - Hypertension - JA       | TRUE                   | 2       | Hypertensive disorder | FALSE   |
| obesity      | 229321427  | 433736     | obesity                              | TRUE                   | 1       | Obesity               | FALSE   |

**White Paper:** Can longitudinal electronic health record data identify patients at higher risk of developing long COVID?

|                      |           |          |                                  |       |   |                                                                                                                  |       |
|----------------------|-----------|----------|----------------------------------|-------|---|------------------------------------------------------------------------------------------------------------------|-------|
| obesity              | 236332904 | 433736   | UVA Obesity                      | FALSE | 1 | Obesity                                                                                                          | FALSE |
| obesity              | 548507987 | 433736   | cs_isc_obesity                   | TRUE  | 1 | Obesity                                                                                                          | FALSE |
| obesity              | 611206754 | 433736   | Obesity                          | TRUE  | 1 | Obesity                                                                                                          | TRUE  |
| obesity              | 856365627 | 433736   | (RHDT) Obesity                   | TRUE  | 1 | Obesity                                                                                                          | FALSE |
| obesity              | 25920448  | 433736   | [VSAC] Overweight or Obese       | TRUE  | 2 | Obesity                                                                                                          | FALSE |
| obesity              | 748628806 | 433736   | [neuro3x] obesity                | TRUE  | 1 | Obesity                                                                                                          | FALSE |
| obesity              | 140513760 | 433736   | [VSAC] Obesity                   | TRUE  | 1 | Obesity                                                                                                          | FALSE |
| obesity              | 372000305 | 433736   | [VSAC] Overweight or Obese       | FALSE | 1 | Obesity                                                                                                          | FALSE |
| obesity              | 652960807 | 433736   | [VSAC] Obesity Conditions        | TRUE  | 1 | Obesity                                                                                                          | TRUE  |
| obesity              | 5957480   | 433736   | LWW_Obesity                      | TRUE  | 2 | Obesity                                                                                                          | FALSE |
| obesity              | 533705532 | 433736   | ARIScience - Obesity             | TRUE  | 3 | Obesity                                                                                                          | FALSE |
| obesity              | 630695504 | 433736   | OBESITY                          | TRUE  | 1 | Obesity                                                                                                          | FALSE |
| obesity              | 651016149 | 433736   | UVA Obesity                      | TRUE  | 2 | Obesity                                                                                                          | FALSE |
| obesity              | 799016302 | 433736   | ARIScience - Obesity             | FALSE | 1 | Obesity                                                                                                          | FALSE |
| obesity              | 835773409 | 433736   | ARIScience - Obesity             | FALSE | 2 | Obesity                                                                                                          | FALSE |
| immunocompromised    | 829301938 | 4153516  | [DATOS] Immunocompromised Stated | TRUE  | 2 | Patient immunocompromised                                                                                        | FALSE |
| immunocompromised    | 370855955 | 4153516  | [DATOS] Immunocompromised Stated | FALSE | 1 | Patient immunocompromised                                                                                        | FALSE |
| pregnancy            | 101607593 | 44837786 | Pregnancy status                 | TRUE  | 1 | Pregnant state, incidental                                                                                       | FALSE |
| COVID-19 vaccination | 145590853 | 702866   | johnson and johnson vaccine      | TRUE  | 3 | SARS-COV-2 (COVID-19) vaccine, vector non-replicating, recombinant spike protein-Ad26, preservative free, 0.5 mL | FALSE |
| COVID-19 vaccination | 948645531 | 37003436 | vaccine_pfizer                   | TRUE  | 1 | SARS-CoV-2 (COVID-19) vaccine, mRNA-BNT162b2 0.1 MG/ML Injectable Suspension                                     | FALSE |
| COVID-19 vaccination | 935484078 | 37003436 | covid vaccine pfizer             | TRUE  | 1 | SARS-CoV-2 (COVID-19) vaccine, mRNA-BNT162b2 0.1 MG/ML Injectable Suspension                                     | FALSE |
| COVID-19 vaccination | 837019313 | 37003432 | covid-19 vaccine - unknown type  | TRUE  | 1 | SARS-CoV-2 (COVID-19) vaccine, mRNA spike protein                                                                | FALSE |
| COVID-19             | 837019313 | 724904   | covid-19 vaccine -               | TRUE  | 1 | SARS-COV-2 (COVID-19) vaccine, UNSPECIFIED                                                                       | FALSE |

**White Paper:** Can longitudinal electronic health record data identify patients at higher risk of developing long COVID?

|                      |           |          |                             |       |   |                                                                                                                     |       |
|----------------------|-----------|----------|-----------------------------|-------|---|---------------------------------------------------------------------------------------------------------------------|-------|
| vaccination          |           |          | unknown type                |       |   |                                                                                                                     |       |
| COVID-19 vaccination | 145590853 | 739906   | johnson and johnson vaccine | TRUE  | 3 | SARS-COV-2 (COVID-19) vaccine, vector - Ad26 100000000000 UNT/ML Injectable Suspension                              | FALSE |
| COVID-19 vaccination | 247296404 | 739906   | johnson and johnson vaccine | FALSE | 1 | SARS-COV-2 (COVID-19) vaccine, vector - Ad26 100000000000 UNT/ML Injectable Suspension                              | FALSE |
| COVID-19 vaccination | 696924427 | 739906   | johnson and johnson vaccine | FALSE | 2 | SARS-COV-2 (COVID-19) vaccine, vector - Ad26 100000000000 UNT/ML Injectable Suspension                              | FALSE |
| COVID-19 vaccination | 696924427 | 724905   | johnson and johnson vaccine | FALSE | 2 | SARS-COV-2 (COVID-19) vaccine, vector non-replicating, recombinant spike protein-ChAdOx1, preservative free, 0.5 mL | FALSE |
| COVID-19 vaccination | 145590853 | 724905   | johnson and johnson vaccine | TRUE  | 3 | SARS-COV-2 (COVID-19) vaccine, vector non-replicating, recombinant spike protein-ChAdOx1, preservative free, 0.5 mL | FALSE |
| COVID-19 vaccination | 705249656 | 37003518 | vaccine_moderna             | TRUE  | 1 | SARS-CoV-2 (COVID-19) vaccine, mRNA-1273 0.2 MG/ML Injectable Suspension                                            | FALSE |
| COVID-19 vaccination | 100751863 | 37003518 | covid vaccine moderna       | TRUE  | 1 | SARS-CoV-2 (COVID-19) vaccine, mRNA-1273 0.2 MG/ML Injectable Suspension                                            | FALSE |
| CCI score            | 535274723 | 22839    | Charlson - Cancer           | TRUE  | 1 | Overlapping malignant neoplasm of larynx                                                                            | FALSE |
| CCI score            | 535274723 | 26361    | Charlson - Cancer           | TRUE  | 1 | Primary malignant neoplasm of pineal gland                                                                          | FALSE |
| CCI score            | 535274723 | 31509    | Charlson - Cancer           | TRUE  | 1 | Primary malignant neoplasm of tonsil                                                                                | FALSE |
| CCI score            | 535274723 | 78093    | Charlson - Cancer           | TRUE  | 1 | Primary malignant neoplasm of pleura                                                                                | FALSE |
| CCI score            | 535274723 | 79758    | Charlson - Cancer           | TRUE  | 1 | Primary malignant neoplasm of scrotum                                                                               | FALSE |
| CCI score            | 535274723 | 132572   | Charlson - Cancer           | TRUE  | 1 | Chronic myeloid leukemia in remission                                                                               | FALSE |
| CCI score            | 535274723 | 135764   | Charlson - Cancer           | TRUE  | 1 | Mycosis fungoides of lymph nodes of multiple sites                                                                  | FALSE |
| CCI score            | 535274723 | 136928   | Charlson - Cancer           | TRUE  | 1 | Hodgkin's disease, nodular sclerosis of intrathoracic lymph nodes                                                   | FALSE |
| CCI score            | 535274723 | 137809   | Charlson - Cancer           | TRUE  | 1 | Primary malignant neoplasm of female breast                                                                         | FALSE |
| CCI score            | 535274723 | 192836   | Charlson - Cancer           | TRUE  | 1 | Primary malignant neoplasm of small intestine                                                                       | FALSE |
| CCI score            | 535274723 | 193138   | Charlson - Cancer           | TRUE  | 1 | Primary malignant neoplasm of lower third of esophagus                                                              | FALSE |
| CCI score            | 535274723 | 193157   | Charlson - Cancer           | TRUE  | 1 | Hodgkin's disease, nodular sclerosis of spleen                                                                      | FALSE |
| CCI score            | 535274723 | 195197   | Charlson - Cancer           | TRUE  | 1 | Primary malignant neoplasm of vulva                                                                                 | FALSE |
| CCI score            | 535274723 | 196044   | Charlson - Cancer           | TRUE  | 1 | Primary malignant neoplasm of stomach                                                                               | FALSE |
| CCI score            | 535274723 | 196047   | Charlson - Cancer           | TRUE  | 1 | Primary malignant neoplasm of parametrium                                                                           | FALSE |
| CCI score            | 535274723 | 197500   | Charlson - Cancer           | TRUE  | 1 | Primary malignant neoplasm of colon                                                                                 | FALSE |
| CCI score            | 535274723 | 198085   | Charlson - Cancer           | TRUE  | 1 | Kaposi's sarcoma of gastrointestinal tract                                                                          | FALSE |
| CCI score            | 535274723 | 199747   | Charlson - Cancer           | TRUE  | 1 | Overlapping malignant neoplasm of small intestine                                                                   | FALSE |

**White Paper:** Can longitudinal electronic health record data identify patients at higher risk of developing long COVID?

|           |           |        |                   |      |   |                                                                                                    |       |
|-----------|-----------|--------|-------------------|------|---|----------------------------------------------------------------------------------------------------|-------|
| CCI score | 535274723 | 199760 | Charlson - Cancer | TRUE | 1 | Hodgkin's disease, nodular sclerosis of intrapelvic lymph nodes                                    | FALSE |
| CCI score | 535274723 | 316356 | Charlson - Cancer | TRUE | 1 | Hodgkin's disease of lymph nodes of multiple sites                                                 | FALSE |
| CCI score | 535274723 | 316644 | Charlson - Cancer | TRUE | 1 | Primary malignant neoplasm of heart                                                                | FALSE |
| CCI score | 535274723 | 321526 | Charlson - Cancer | TRUE | 1 | Monocytic leukemia                                                                                 | FALSE |
| CCI score | 535274723 | 378696 | Charlson - Cancer | TRUE | 1 | Primary malignant neoplasm of choroid                                                              | FALSE |
| CCI score | 535274723 | 432264 | Charlson - Cancer | TRUE | 1 | Primary malignant neoplasm of broad ligament                                                       | FALSE |
| CCI score | 535274723 | 433423 | Charlson - Cancer | TRUE | 1 | Primary malignant neoplasm of pancreatic duct                                                      | FALSE |
| CCI score | 535274723 | 433716 | Charlson - Cancer | TRUE | 1 | Primary malignant neoplasm of testis                                                               | FALSE |
| CCI score | 535274723 | 433975 | Charlson - Cancer | TRUE | 1 | Primary malignant neoplasm of cranial nerve                                                        | FALSE |
| CCI score | 535274723 | 434293 | Charlson - Cancer | TRUE | 1 | Primary malignant neoplasm of body of pancreas                                                     | FALSE |
| CCI score | 535274723 | 434587 | Charlson - Cancer | TRUE | 1 | Primary malignant neoplasm of dorsal surface of tongue                                             | FALSE |
| CCI score | 535274723 | 435478 | Charlson - Cancer | TRUE | 1 | Primary malignant neoplasm of upper gum                                                            | FALSE |
| CCI score | 535274723 | 435754 | Charlson - Cancer | TRUE | 1 | Malignant tumor of ascending colon                                                                 | FALSE |
| CCI score | 535274723 | 436926 | Charlson - Cancer | TRUE | 1 | Primary malignant neoplasm of cerebral meninges                                                    | FALSE |
| CCI score | 535274723 | 437224 | Charlson - Cancer | TRUE | 1 | Primary malignant neoplasm of greater curvature of stomach                                         | FALSE |
| CCI score | 535274723 | 437798 | Charlson - Cancer | TRUE | 1 | Primary malignant neoplasm of splenic flexure of colon                                             | FALSE |
| CCI score | 535274723 | 438367 | Charlson - Cancer | TRUE | 1 | Primary malignant neoplasm of nasal cavity                                                         | FALSE |
| CCI score | 535274723 | 438368 | Charlson - Cancer | TRUE | 1 | Primary malignant neoplasm of thymus                                                               | FALSE |
| CCI score | 535274723 | 438703 | Charlson - Cancer | TRUE | 1 | Hodgkin's disease, lymphocytic-histiocytic predominance of lymph nodes of axilla AND/OR upper limb | FALSE |
| CCI score | 535274723 | 438979 | Charlson - Cancer | TRUE | 1 | Primary malignant neoplasm of hepatic flexure of colon                                             | FALSE |
| CCI score | 535274723 | 439270 | Charlson - Cancer | TRUE | 1 | Sézary's disease of intrapelvic lymph nodes                                                        | FALSE |
| CCI score | 535274723 | 439282 | Charlson - Cancer | TRUE | 1 | Hodgkin's disease, lymphocytic depletion of intrapelvic lymph nodes                                | FALSE |
| CCI score | 535274723 | 439392 | Charlson - Cancer | TRUE | 1 | Primary malignant neoplasm                                                                         | FALSE |
| CCI score | 535274723 | 440344 | Charlson - Cancer | TRUE | 1 | Primary malignant neoplasm of lateral portion of floor of mouth                                    | FALSE |
| CCI score | 535274723 | 441521 | Charlson - Cancer | TRUE | 1 | Malignant lymphoma of lymph nodes of axilla AND/OR upper limb                                      | FALSE |
| CCI score | 535274723 | 442160 | Charlson - Cancer | TRUE | 1 | Hodgkin's disease, mixed cellularity of lymph nodes of inguinal region AND/OR lower limb           | FALSE |
| CCI score | 535274723 | 442163 | Charlson - Cancer | TRUE | 1 | Hodgkin's disease, lymphocytic-histiocytic predominance of lymph nodes of head, face AND/OR neck   | FALSE |
| CCI score | 535274723 | 443382 | Charlson - Cancer | TRUE | 1 | Malignant tumor of descending colon                                                                | FALSE |

**White Paper:** Can longitudinal electronic health record data identify patients at higher risk of developing long COVID?

|           |           |         |                   |      |   |                                                                                  |       |
|-----------|-----------|---------|-------------------|------|---|----------------------------------------------------------------------------------|-------|
| CCI score | 535274723 | 444224  | Charlson - Cancer | TRUE | 1 | Overlapping malignant neoplasm of lip, oral cavity and pharynx                   | FALSE |
| CCI score | 535274723 | 4001171 | Charlson - Cancer | TRUE | 1 | Liver cell carcinoma                                                             | FALSE |
| CCI score | 535274723 | 4002343 | Charlson - Cancer | TRUE | 1 | Overlapping malignant neoplasm of peripheral nerves and autonomic nervous system | FALSE |
| CCI score | 535274723 | 4002496 | Charlson - Cancer | TRUE | 1 | Mast cell leukemia (clinical)                                                    | FALSE |
| CCI score | 535274723 | 4003675 | Charlson - Cancer | TRUE | 1 | Primary malignant neoplasm of cloacogenic zone                                   | FALSE |
| CCI score | 535274723 | 4033836 | Charlson - Cancer | TRUE | 1 | Melanoma in situ of eyelid, including canthus                                    | FALSE |
| CCI score | 535274723 | 4038839 | Charlson - Cancer | TRUE | 1 | Hodgkin lymphoma, nodular lymphocyte predominance (clinical)                     | FALSE |
| CCI score | 535274723 | 4038845 | Charlson - Cancer | TRUE | 1 | Hairy cell leukemia (clinical)                                                   | FALSE |
| CCI score | 535274723 | 4079686 | Charlson - Cancer | TRUE | 1 | Acute megakaryoblastic leukemia                                                  | FALSE |
| CCI score | 535274723 | 4082487 | Charlson - Cancer | TRUE | 1 | Cutaneous/peripheral T-cell lymphoma                                             | FALSE |
| CCI score | 535274723 | 4089665 | Charlson - Cancer | TRUE | 1 | Malignant tumor of peritoneum and retroperitoneum                                | FALSE |
| CCI score | 535274723 | 4089860 | Charlson - Cancer | TRUE | 1 | Malignant melanoma of lip                                                        | FALSE |
| CCI score | 535274723 | 4091464 | Charlson - Cancer | TRUE | 1 | Malignant neoplasm of nipple and areola of female breast                         | FALSE |
| CCI score | 535274723 | 4091490 | Charlson - Cancer | TRUE | 1 | Malignant neoplasm of cerebrum (excluding lobes and ventricles)                  | FALSE |
| CCI score | 535274723 | 4095312 | Charlson - Cancer | TRUE | 1 | Malignant tumor of nasopharynx                                                   | FALSE |
| CCI score | 535274723 | 4095432 | Charlson - Cancer | TRUE | 1 | Malignant neoplasm of liver and intrahepatic bile ducts                          | FALSE |
| CCI score | 535274723 | 4095748 | Charlson - Cancer | TRUE | 1 | Malignant neoplasm of fundus of corpus uteri                                     | FALSE |
| CCI score | 535274723 | 4100425 | Charlson - Cancer | TRUE | 1 | Merkel cell carcinoma                                                            | FALSE |
| CCI score | 535274723 | 4114222 | Charlson - Cancer | TRUE | 1 | Malignant tumor of head and neck                                                 | FALSE |
| CCI score | 535274723 | 4130672 | Charlson - Cancer | TRUE | 1 | Neoplasm of multiple endocrine glands                                            | FALSE |
| CCI score | 535274723 | 4147411 | Charlson - Cancer | TRUE | 1 | Follicular non-Hodgkin's lymphoma                                                | FALSE |
| CCI score | 535274723 | 4156114 | Charlson - Cancer | TRUE | 1 | Primary malignant neoplasm of border of tongue                                   | FALSE |
| CCI score | 535274723 | 4157456 | Charlson - Cancer | TRUE | 1 | Primary malignant neoplasm of skin head and neck                                 | FALSE |
| CCI score | 535274723 | 4173974 | Charlson - Cancer | TRUE | 1 | B-cell prolymphocytic leukemia                                                   | FALSE |
| CCI score | 535274723 | 4180312 | Charlson - Cancer | TRUE | 1 | Neoplasm of extremity                                                            | FALSE |
| CCI score | 535274723 | 4212994 | Charlson - Cancer | TRUE | 1 | Extranodal NK/T-cell lymphoma, nasal type                                        | FALSE |
| CCI score | 535274723 | 4244488 | Charlson - Cancer | TRUE | 1 | Malignant melanoma of skin of nose                                               | FALSE |
| CCI score | 535274723 | 4246137 | Charlson - Cancer | TRUE | 1 | Primary malignant neoplasm of optic nerve                                        | FALSE |
| CCI score | 535274723 | 4247719 | Charlson - Cancer | TRUE | 1 | Primary malignant neoplasm of ascending colon                                    | FALSE |



**White Paper:** Can longitudinal electronic health record data identify patients at higher risk of developing long COVID?

|           |           |          |                   |      |   |                                                                           |       |
|-----------|-----------|----------|-------------------|------|---|---------------------------------------------------------------------------|-------|
| CCI score | 535274723 | 4299149  | Charlson - Cancer | TRUE | 1 | Anaplastic large T-cell systemic malignant lymphoma                       | FALSE |
| CCI score | 535274723 | 4312685  | Charlson - Cancer | TRUE | 1 | Primary malignant neoplasm of skin of lower limb                          | FALSE |
| CCI score | 535274723 | 37018934 | Charlson - Cancer | TRUE | 1 | Malignant carcinoid tumor of rectum                                       | FALSE |
| CCI score | 535274723 | 40486465 | Charlson - Cancer | TRUE | 1 | Gastrointestinal stromal tumor of esophagus                               | FALSE |
| CCI score | 535274723 | 40492266 | Charlson - Cancer | TRUE | 1 | Gastrointestinal stromal tumor of stomach                                 | FALSE |
| CCI score | 535274723 | 73153    | Charlson - Cancer | TRUE | 1 | Malignant neoplasm of lateral wall of urinary bladder                     | FALSE |
| CCI score | 535274723 | 76924    | Charlson - Cancer | TRUE | 1 | Primary malignant neoplasm of ureteric orifice of urinary bladder         | FALSE |
| CCI score | 535274723 | 77812    | Charlson - Cancer | TRUE | 1 | Malignant neoplasm of anterior wall of urinary bladder                    | FALSE |
| CCI score | 535274723 | 80340    | Charlson - Cancer | TRUE | 1 | Primary malignant neoplasm of epididymis                                  | FALSE |
| CCI score | 535274723 | 133147   | Charlson - Cancer | TRUE | 1 | Primary malignant neoplasm of skin of trunk                               | FALSE |
| CCI score | 535274723 | 133158   | Charlson - Cancer | TRUE | 1 | Plasma cell leukemia in remission                                         | FALSE |
| CCI score | 535274723 | 133711   | Charlson - Cancer | TRUE | 1 | Overlapping malignant neoplasm of female breast                           | FALSE |
| CCI score | 535274723 | 133969   | Charlson - Cancer | TRUE | 1 | Primary malignant neoplasm of vermilion border of lip                     | FALSE |
| CCI score | 535274723 | 134603   | Charlson - Cancer | TRUE | 1 | Chronic myeloid leukemia                                                  | FALSE |
| CCI score | 535274723 | 139753   | Charlson - Cancer | TRUE | 1 | Primary malignant neoplasm of parathyroid gland                           | FALSE |
| CCI score | 535274723 | 140958   | Charlson - Cancer | TRUE | 1 | Kaposi's sarcoma of palate                                                | FALSE |
| CCI score | 535274723 | 141524   | Charlson - Cancer | TRUE | 1 | Mycosis fungoides of lymph nodes of axilla AND/OR upper limb              | FALSE |
| CCI score | 535274723 | 192847   | Charlson - Cancer | TRUE | 1 | Primary malignant neoplasm of isthmus of uterus                           | FALSE |
| CCI score | 535274723 | 193418   | Charlson - Cancer | TRUE | 1 | Primary malignant neoplasm of spleen                                      | FALSE |
| CCI score | 535274723 | 195760   | Charlson - Cancer | TRUE | 1 | Sézary's disease of spleen                                                | FALSE |
| CCI score | 535274723 | 196049   | Charlson - Cancer | TRUE | 1 | Primary malignant neoplasm of urethra                                     | FALSE |
| CCI score | 535274723 | 196359   | Charlson - Cancer | TRUE | 1 | Primary malignant neoplasm of uterine cervix                              | FALSE |
| CCI score | 535274723 | 197803   | Charlson - Cancer | TRUE | 1 | Overlapping malignant neoplasm of stomach                                 | FALSE |
| CCI score | 535274723 | 198704   | Charlson - Cancer | TRUE | 1 | Hodgkin's disease of spleen                                               | FALSE |
| CCI score | 535274723 | 200355   | Charlson - Cancer | TRUE | 1 | Hodgkin's disease of intra-abdominal lymph nodes                          | FALSE |
| CCI score | 535274723 | 200963   | Charlson - Cancer | TRUE | 1 | Primary malignant neoplasm of paraurethral glands                         | FALSE |
| CCI score | 535274723 | 254583   | Charlson - Cancer | TRUE | 1 | Kaposi's sarcoma of lung                                                  | FALSE |
| CCI score | 535274723 | 259748   | Charlson - Cancer | TRUE | 1 | Primary malignant neoplasm of accessory sinus                             | FALSE |
| CCI score | 535274723 | 313980   | Charlson - Cancer | TRUE | 1 | Hodgkin's disease, lymphocytic depletion of lymph nodes of multiple sites | FALSE |
| CCI score | 535274723 | 375479   | Charlson - Cancer | TRUE | 1 | Kaposi's sarcoma of soft tissue                                           | FALSE |

**White Paper:** Can longitudinal electronic health record data identify patients at higher risk of developing long COVID?

|           |           |        |                   |      |   |                                                                                               |       |
|-----------|-----------|--------|-------------------|------|---|-----------------------------------------------------------------------------------------------|-------|
| CCI score | 535274723 | 377811 | Charlson - Cancer | TRUE | 1 | Primary malignant neoplasm of retina (primary)                                                | FALSE |
| CCI score | 535274723 | 432558 | Charlson - Cancer | TRUE | 1 | Overlapping malignant neoplasm of nasopharynx                                                 | FALSE |
| CCI score | 535274723 | 432845 | Charlson - Cancer | TRUE | 1 | Primary malignant neoplasm of central portion of female breast                                | FALSE |
| CCI score | 535274723 | 432848 | Charlson - Cancer | TRUE | 1 | Primary malignant neoplasm of cerebral ventricle                                              | FALSE |
| CCI score | 535274723 | 433143 | Charlson - Cancer | TRUE | 1 | Primary malignant neoplasm of appendix                                                        | FALSE |
| CCI score | 535274723 | 433161 | Charlson - Cancer | TRUE | 1 | Hodgkin's disease, lymphocytic depletion of lymph nodes of head, face AND/OR neck             | FALSE |
| CCI score | 535274723 | 433704 | Charlson - Cancer | TRUE | 1 | Primary malignant neoplasm of retromolar area                                                 | FALSE |
| CCI score | 535274723 | 434289 | Charlson - Cancer | TRUE | 1 | Primary malignant neoplasm of lingual tonsil                                                  | FALSE |
| CCI score | 535274723 | 434577 | Charlson - Cancer | TRUE | 1 | Primary malignant neoplasm of hypopharyngeal aspect of aryepiglottic fold                     | FALSE |
| CCI score | 535274723 | 434877 | Charlson - Cancer | TRUE | 1 | Hodgkin's disease of lymph nodes of axilla AND/OR upper limb                                  | FALSE |
| CCI score | 535274723 | 435203 | Charlson - Cancer | TRUE | 1 | Hodgkin's disease, mixed cellularity of extranodal AND/OR solid organ site                    | FALSE |
| CCI score | 535274723 | 435493 | Charlson - Cancer | TRUE | 1 | Primary malignant neoplasm of short bone of upper limb                                        | FALSE |
| CCI score | 535274723 | 436059 | Charlson - Cancer | TRUE | 1 | Multiple myeloma in remission                                                                 | FALSE |
| CCI score | 535274723 | 436353 | Charlson - Cancer | TRUE | 1 | Primary malignant neoplasm of upper outer quadrant of female breast                           | FALSE |
| CCI score | 535274723 | 438080 | Charlson - Cancer | TRUE | 1 | Primary malignant neoplasm of anterior wall of nasopharynx                                    | FALSE |
| CCI score | 535274723 | 438086 | Charlson - Cancer | TRUE | 1 | Primary malignant neoplasm of parietal lobe                                                   | FALSE |
| CCI score | 535274723 | 438095 | Charlson - Cancer | TRUE | 1 | Overlapping malignant neoplasm of eye and adnexa (primary)                                    | FALSE |
| CCI score | 535274723 | 438370 | Charlson - Cancer | TRUE | 1 | Primary malignant neoplasm of glans penis                                                     | FALSE |
| CCI score | 535274723 | 438373 | Charlson - Cancer | TRUE | 1 | Hodgkin's disease, lymphocytic-histiocytic predominance of extranodal AND/OR solid organ site | FALSE |
| CCI score | 535274723 | 438693 | Charlson - Cancer | TRUE | 1 | Primary malignant neoplasm of mediastinum                                                     | FALSE |
| CCI score | 535274723 | 438694 | Charlson - Cancer | TRUE | 1 | Primary malignant neoplasm of hard palate                                                     | FALSE |
| CCI score | 535274723 | 438977 | Charlson - Cancer | TRUE | 1 | Primary malignant neoplasm of ribs and/or sternum and/or clavicle                             | FALSE |
| CCI score | 535274723 | 439293 | Charlson - Cancer | TRUE | 1 | Burkitt's lymphoma of spleen                                                                  | FALSE |
| CCI score | 535274723 | 440345 | Charlson - Cancer | TRUE | 1 | Primary malignant neoplasm of lateral wall of oropharynx                                      | FALSE |
| CCI score | 535274723 | 440649 | Charlson - Cancer | TRUE | 1 | Primary malignant neoplasm of head of pancreas                                                | FALSE |
| CCI score | 535274723 | 440956 | Charlson - Cancer | TRUE | 1 | Primary malignant neoplasm of upper inner quadrant of female breast                           | FALSE |
| CCI score | 535274723 | 440965 | Charlson - Cancer | TRUE | 1 | Hodgkin's disease of intrathoracic lymph nodes                                                | FALSE |
| CCI score | 535274723 | 441223 | Charlson - Cancer | TRUE | 1 | Primary malignant neoplasm of superior wall of nasopharynx                                    | FALSE |
| CCI score | 535274723 | 441513 | Charlson - Cancer | TRUE | 1 | Primary malignant neoplasm of axillary tail of breast                                         | FALSE |

**White Paper:** Can longitudinal electronic health record data identify patients at higher risk of developing long COVID?

|           |           |          |                   |      |   |                                                                                               |       |
|-----------|-----------|----------|-------------------|------|---|-----------------------------------------------------------------------------------------------|-------|
| CCI score | 535274723 | 442169   | Charlson - Cancer | TRUE | 1 | Mycosis fungoides of intrapelvic lymph nodes                                                  | FALSE |
| CCI score | 535274723 | 4001172  | Charlson - Cancer | TRUE | 1 | Hepatoblastoma                                                                                | FALSE |
| CCI score | 535274723 | 4002340  | Charlson - Cancer | TRUE | 1 | Primary malignant neoplasm of meninges                                                        | FALSE |
| CCI score | 535274723 | 4003184  | Charlson - Cancer | TRUE | 1 | Acute panmyelosis with myelofibrosis                                                          | FALSE |
| CCI score | 535274723 | 4003684  | Charlson - Cancer | TRUE | 1 | Overlapping malignant neoplasm of male breast                                                 | FALSE |
| CCI score | 535274723 | 4003830  | Charlson - Cancer | TRUE | 1 | Diffuse non-Hodgkin's lymphoma                                                                | FALSE |
| CCI score | 535274723 | 4038838  | Charlson - Cancer | TRUE | 1 | Non-Hodgkin's lymphoma (clinical)                                                             | FALSE |
| CCI score | 535274723 | 4038843  | Charlson - Cancer | TRUE | 1 | Hodgkin's disease, mixed cellularity (clinical)                                               | FALSE |
| CCI score | 535274723 | 4092223  | Charlson - Cancer | TRUE | 1 | Malignant neoplasm of orbital bone                                                            | FALSE |
| CCI score | 535274723 | 4094260  | Charlson - Cancer | TRUE | 1 | Malignant neoplasm of peripheral nerves and autonomic nervous system                          | FALSE |
| CCI score | 535274723 | 4094548  | Charlson - Cancer | TRUE | 1 | Extramedullary plasmacytoma                                                                   | FALSE |
| CCI score | 535274723 | 4094872  | Charlson - Cancer | TRUE | 1 | Malignant neoplasm, overlapping lesion of accessory sinuses                                   | FALSE |
| CCI score | 535274723 | 4098597  | Charlson - Cancer | TRUE | 1 | Waldenström macroglobulinemia                                                                 | FALSE |
| CCI score | 535274723 | 4111023  | Charlson - Cancer | TRUE | 1 | Malignant tumor of anus and anal canal                                                        | FALSE |
| CCI score | 535274723 | 4155171  | Charlson - Cancer | TRUE | 1 | Primary malignant neoplasm of lip                                                             | FALSE |
| CCI score | 535274723 | 4162859  | Charlson - Cancer | TRUE | 1 | Primary malignant neoplasm of adrenal medulla                                                 | FALSE |
| CCI score | 535274723 | 4170421  | Charlson - Cancer | TRUE | 1 | Gastrointestinal stromal tumor                                                                | FALSE |
| CCI score | 535274723 | 4217892  | Charlson - Cancer | TRUE | 1 | Hand-Schüller-Christian disease                                                               | FALSE |
| CCI score | 535274723 | 4246808  | Charlson - Cancer | TRUE | 1 | Primary malignant neoplasm of ciliary body (primary)                                          | FALSE |
| CCI score | 535274723 | 4247336  | Charlson - Cancer | TRUE | 1 | Primary malignant neoplasm of middle ear                                                      | FALSE |
| CCI score | 535274723 | 4264693  | Charlson - Cancer | TRUE | 1 | Mast cell malignancy                                                                          | FALSE |
| CCI score | 535274723 | 40481522 | Charlson - Cancer | TRUE | 1 | Primary mediastinal (thymic) large B-cell lymphoma                                            | FALSE |
| CCI score | 535274723 | 40481524 | Charlson - Cancer | TRUE | 1 | Acute myeloid leukemia with t(9:11)(p22;q23); MLLT3-MLL                                       | FALSE |
| CCI score | 535274723 | 40482893 | Charlson - Cancer | TRUE | 1 | Extranodal marginal zone B-cell lymphoma of mucosa-associated lymphoid tissue (MALT-lymphoma) | FALSE |
| CCI score | 535274723 | 40487528 | Charlson - Cancer | TRUE | 1 | Non-Hodgkin's lymphoma of extranodal site                                                     | FALSE |
| CCI score | 535274723 | 40492267 | Charlson - Cancer | TRUE | 1 | Gastrointestinal stromal tumor of small intestine                                             | FALSE |
| CCI score | 535274723 | 45770892 | Charlson - Cancer | TRUE | 1 | Primary malignant neoplasm of uterus                                                          | FALSE |
| CCI score | 535274723 | 26052    | Charlson - Cancer | TRUE | 1 | Primary malignant neoplasm of larynx                                                          | FALSE |
| CCI score | 535274723 | 28083    | Charlson - Cancer | TRUE | 1 | Primary malignant neoplasm of pharynx                                                         | FALSE |

**White Paper:** Can longitudinal electronic health record data identify patients at higher risk of developing long COVID?

|           |           |        |                   |      |   |                                                                                    |       |
|-----------|-----------|--------|-------------------|------|---|------------------------------------------------------------------------------------|-------|
| CCI score | 535274723 | 76349  | Charlson - Cancer | TRUE | 1 | Primary malignant neoplasm of urinary system                                       | FALSE |
| CCI score | 535274723 | 80045  | Charlson - Cancer | TRUE | 1 | Primary malignant neoplasm of anus                                                 | FALSE |
| CCI score | 535274723 | 132832 | Charlson - Cancer | TRUE | 1 | Primary malignant neoplasm of inner aspect of lip                                  | FALSE |
| CCI score | 535274723 | 132853 | Charlson - Cancer | TRUE | 1 | Lymphoid leukemia                                                                  | FALSE |
| CCI score | 535274723 | 133154 | Charlson - Cancer | TRUE | 1 | Plasma cell leukemia                                                               | FALSE |
| CCI score | 535274723 | 133419 | Charlson - Cancer | TRUE | 1 | Overlapping malignant melanoma of skin                                             | FALSE |
| CCI score | 535274723 | 133424 | Charlson - Cancer | TRUE | 1 | Primary malignant neoplasm of thyroid gland                                        | FALSE |
| CCI score | 535274723 | 134290 | Charlson - Cancer | TRUE | 1 | Primary malignant neoplasm of palate                                               | FALSE |
| CCI score | 535274723 | 134305 | Charlson - Cancer | TRUE | 1 | Acute lymphoid leukemia                                                            | FALSE |
| CCI score | 535274723 | 134596 | Charlson - Cancer | TRUE | 1 | Lymphoid leukemia in remission                                                     | FALSE |
| CCI score | 535274723 | 135489 | Charlson - Cancer | TRUE | 1 | Primary malignant neoplasm of male breast                                          | FALSE |
| CCI score | 535274723 | 135759 | Charlson - Cancer | TRUE | 1 | Sézary's disease of extranodal AND/OR solid organ site                             | FALSE |
| CCI score | 535274723 | 135766 | Charlson - Cancer | TRUE | 1 | Leukemia in remission                                                              | FALSE |
| CCI score | 535274723 | 136655 | Charlson - Cancer | TRUE | 1 | Hodgkin's disease, mixed cellularity of intrathoracic lymph nodes                  | FALSE |
| CCI score | 535274723 | 136915 | Charlson - Cancer | TRUE | 1 | Primary malignant neoplasm of skin of lip                                          | FALSE |
| CCI score | 535274723 | 138378 | Charlson - Cancer | TRUE | 1 | Sézary's disease of lymph nodes of axilla AND/OR upper limb                        | FALSE |
| CCI score | 535274723 | 140664 | Charlson - Cancer | TRUE | 1 | Sézary's disease of lymph nodes of multiple sites                                  | FALSE |
| CCI score | 535274723 | 141243 | Charlson - Cancer | TRUE | 1 | Hodgkin's disease, lymphocytic depletion of intrathoracic lymph nodes              | FALSE |
| CCI score | 535274723 | 192560 | Charlson - Cancer | TRUE | 1 | Malignant lymphoma of lymph nodes of inguinal region AND/OR lower limb             | FALSE |
| CCI score | 535274723 | 194589 | Charlson - Cancer | TRUE | 1 | Primary malignant neoplasm of biliary tract                                        | FALSE |
| CCI score | 535274723 | 194593 | Charlson - Cancer | TRUE | 1 | Mycosis fungoides of lymph nodes of inguinal region AND/OR lower limb              | FALSE |
| CCI score | 535274723 | 194876 | Charlson - Cancer | TRUE | 1 | Hodgkin's disease, lymphocytic-histiocytic predominance of intrapelvic lymph nodes | FALSE |
| CCI score | 535274723 | 195480 | Charlson - Cancer | TRUE | 1 | Primary malignant neoplasm of renal pelvis                                         | FALSE |
| CCI score | 535274723 | 196055 | Charlson - Cancer | TRUE | 1 | Burkitt's lymphoma of lymph nodes of inguinal region and lower limb                | FALSE |
| CCI score | 535274723 | 197225 | Charlson - Cancer | TRUE | 1 | Primary malignant neoplasm of clitoris                                             | FALSE |
| CCI score | 535274723 | 197507 | Charlson - Cancer | TRUE | 1 | Primary malignant neoplasm of male genital organ                                   | FALSE |
| CCI score | 535274723 | 198082 | Charlson - Cancer | TRUE | 1 | Overlapping malignant neoplasm of body of uterus                                   | FALSE |
| CCI score | 535274723 | 198374 | Charlson - Cancer | TRUE | 1 | Nodular lymphoma of spleen                                                         | FALSE |
| CCI score | 535274723 | 200052 | Charlson - Cancer | TRUE | 1 | Primary malignant neoplasm of uterine adnexa                                       | FALSE |

**White Paper:** Can longitudinal electronic health record data identify patients at higher risk of developing long COVID?

|           |           |        |                   |      |   |                                                                                        |       |
|-----------|-----------|--------|-------------------|------|---|----------------------------------------------------------------------------------------|-------|
| CCI score | 535274723 | 200054 | Charlson - Cancer | TRUE | 1 | Primary malignant neoplasm of ureter                                                   | FALSE |
| CCI score | 535274723 | 201242 | Charlson - Cancer | TRUE | 1 | Hodgkin's disease, lymphocytic-histiocytic predominance of intra-abdominal lymph nodes | FALSE |
| CCI score | 535274723 | 201813 | Charlson - Cancer | TRUE | 1 | Mycosis fungoides of intra-abdominal lymph nodes                                       | FALSE |
| CCI score | 535274723 | 257503 | Charlson - Cancer | TRUE | 1 | Primary malignant neoplasm of main bronchus                                            | FALSE |
| CCI score | 535274723 | 260336 | Charlson - Cancer | TRUE | 1 | Primary malignant neoplasm of glottis                                                  | FALSE |
| CCI score | 535274723 | 312846 | Charlson - Cancer | TRUE | 1 | Kaposi's sarcoma of lymph nodes                                                        | FALSE |
| CCI score | 535274723 | 315763 | Charlson - Cancer | TRUE | 1 | Hodgkin's disease, nodular sclerosis of lymph nodes of multiple sites                  | FALSE |
| CCI score | 535274723 | 317510 | Charlson - Cancer | TRUE | 1 | Leukemia                                                                               | FALSE |
| CCI score | 535274723 | 375490 | Charlson - Cancer | TRUE | 1 | Primary malignant neoplasm of cornea (primary)                                         | FALSE |
| CCI score | 535274723 | 378081 | Charlson - Cancer | TRUE | 1 | Overlapping malignant neoplasm of soft tissues                                         | FALSE |
| CCI score | 535274723 | 432271 | Charlson - Cancer | TRUE | 1 | Carcinoid tumor of ileum                                                               | FALSE |
| CCI score | 535274723 | 433709 | Charlson - Cancer | TRUE | 1 | Primary malignant neoplasm of tonsillar fossa                                          | FALSE |
| CCI score | 535274723 | 433976 | Charlson - Cancer | TRUE | 1 | Primary malignant neoplasm of temporal lobe                                            | FALSE |
| CCI score | 535274723 | 434592 | Charlson - Cancer | TRUE | 1 | B-cell lymphoma (clinical)                                                             | FALSE |
| CCI score | 535274723 | 435190 | Charlson - Cancer | TRUE | 1 | Primary malignant neoplasm of pyriform sinus                                           | FALSE |
| CCI score | 535274723 | 435474 | Charlson - Cancer | TRUE | 1 | Primary malignant neoplasm of posterior hypopharyngeal wall                            | FALSE |
| CCI score | 535274723 | 435484 | Charlson - Cancer | TRUE | 1 | Primary malignant neoplasm of trigone of urinary bladder                               | FALSE |
| CCI score | 535274723 | 435485 | Charlson - Cancer | TRUE | 1 | Primary malignant neoplasm of ill-defined site                                         | FALSE |
| CCI score | 535274723 | 435751 | Charlson - Cancer | TRUE | 1 | Primary malignant neoplasm of fundus of stomach                                        | FALSE |
| CCI score | 535274723 | 436348 | Charlson - Cancer | TRUE | 1 | Primary malignant neoplasm of anal canal                                               | FALSE |
| CCI score | 535274723 | 436635 | Charlson - Cancer | TRUE | 1 | Primary malignant neoplasm of sigmoid colon                                            | FALSE |
| CCI score | 535274723 | 436640 | Charlson - Cancer | TRUE | 1 | Primary malignant neoplasm of long bone of lower limb                                  | FALSE |
| CCI score | 535274723 | 436923 | Charlson - Cancer | TRUE | 1 | Primary malignant neoplasm of urinary bladder neck                                     | FALSE |
| CCI score | 535274723 | 438692 | Charlson - Cancer | TRUE | 1 | Primary malignant neoplasm of lateral wall of nasopharynx                              | FALSE |
| CCI score | 535274723 | 438698 | Charlson - Cancer | TRUE | 1 | Malignant lymphoma of lymph nodes of head, face AND/OR neck                            | FALSE |
| CCI score | 535274723 | 439266 | Charlson - Cancer | TRUE | 1 | Sézary's disease of lymph nodes of inguinal region and lower limb                      | FALSE |
| CCI score | 535274723 | 439285 | Charlson - Cancer | TRUE | 1 | Hodgkin's disease, lymphocytic depletion of intra-abdominal lymph nodes                | FALSE |
| CCI score | 535274723 | 440047 | Charlson - Cancer | TRUE | 1 | Primary malignant neoplasm of tonsillar pillar                                         | FALSE |
| CCI score | 535274723 | 440335 | Charlson - Cancer | TRUE | 1 | Primary malignant neoplasm of lower gum                                                | FALSE |

**White Paper:** Can longitudinal electronic health record data identify patients at higher risk of developing long COVID?

|           |           |          |                   |      |   |                                                                                       |       |
|-----------|-----------|----------|-------------------|------|---|---------------------------------------------------------------------------------------|-------|
| CCI score | 535274723 | 441520   | Charlson - Cancer | TRUE | 1 | Primary malignant neoplasm of round ligament of uterus                                | FALSE |
| CCI score | 535274723 | 441805   | Charlson - Cancer | TRUE | 1 | Primary malignant neoplasm of endocervix                                              | FALSE |
| CCI score | 535274723 | 441806   | Charlson - Cancer | TRUE | 1 | Primary malignant neoplasm of brain stem                                              | FALSE |
| CCI score | 535274723 | 442151   | Charlson - Cancer | TRUE | 1 | Hodgkin's disease, lymphocytic depletion of lymph nodes of axilla AND/OR upper limb   | FALSE |
| CCI score | 535274723 | 443380   | Charlson - Cancer | TRUE | 1 | Malignant tumor of thymus                                                             | FALSE |
| CCI score | 535274723 | 444203   | Charlson - Cancer | TRUE | 1 | Primary malignant neoplasm of articular cartilage                                     | FALSE |
| CCI score | 535274723 | 4001329  | Charlson - Cancer | TRUE | 1 | Follicular non-Hodgkin's lymphoma, mixed small cleaved cell and large cell (clinical) | FALSE |
| CCI score | 535274723 | 4003028  | Charlson - Cancer | TRUE | 1 | Primary malignant neoplasm of descended testis                                        | FALSE |
| CCI score | 535274723 | 4003029  | Charlson - Cancer | TRUE | 1 | Overlapping malignant neoplasm of vulva                                               | FALSE |
| CCI score | 535274723 | 4038846  | Charlson - Cancer | TRUE | 1 | Langerhans cell histiocytosis, disseminated (clinical)                                | FALSE |
| CCI score | 535274723 | 4041799  | Charlson - Cancer | TRUE | 1 | Sézary's disease (clinical)                                                           | FALSE |
| CCI score | 535274723 | 4079282  | Charlson - Cancer | TRUE | 1 | Atypical chronic myeloid leukemia                                                     | FALSE |
| CCI score | 535274723 | 4079683  | Charlson - Cancer | TRUE | 1 | T-cell prolymphocytic leukemia                                                        | FALSE |
| CCI score | 535274723 | 4091486  | Charlson - Cancer | TRUE | 1 | Malignant neoplasm of overlapping lesion of urinary organs                            | FALSE |
| CCI score | 535274723 | 4095168  | Charlson - Cancer | TRUE | 1 | Malignant neoplasm, overlapping lesion of bladder                                     | FALSE |
| CCI score | 535274723 | 4097283  | Charlson - Cancer | TRUE | 1 | Malignant neoplasm of peripheral nerves of lower limb, including hip                  | FALSE |
| CCI score | 535274723 | 4097561  | Charlson - Cancer | TRUE | 1 | Burkitt's lymphoma of lymph nodes of axilla and upper limb                            | FALSE |
| CCI score | 535274723 | 4114221  | Charlson - Cancer | TRUE | 1 | Malignant tumor of unknown origin                                                     | FALSE |
| CCI score | 535274723 | 4149851  | Charlson - Cancer | TRUE | 1 | Malignant melanoma of upper limb                                                      | FALSE |
| CCI score | 535274723 | 4173963  | Charlson - Cancer | TRUE | 1 | B-cell acute lymphoblastic leukemia                                                   | FALSE |
| CCI score | 535274723 | 4246802  | Charlson - Cancer | TRUE | 1 | Primary malignant neoplasm of bone of skull                                           | FALSE |
| CCI score | 535274723 | 4300704  | Charlson - Cancer | TRUE | 1 | Diffuse large B-cell lymphoma (nodal/systemic with skin involvement)                  | FALSE |
| CCI score | 535274723 | 36684820 | Charlson - Cancer | TRUE | 1 | Primary malignant neoplasm of axillary tail of right female breast                    | FALSE |
| CCI score | 535274723 | 40481357 | Charlson - Cancer | TRUE | 1 | Large cell lymphoma of intrapelvic lymph nodes                                        | FALSE |
| CCI score | 535274723 | 40481901 | Charlson - Cancer | TRUE | 1 | Mantle cell lymphoma                                                                  | FALSE |
| CCI score | 535274723 | 40486896 | Charlson - Cancer | TRUE | 1 | Primary malignant neoplasm of extrahepatic bile duct                                  | FALSE |
| CCI score | 535274723 | 40650479 | Charlson - Cancer | TRUE | 1 | Primary malignant neoplasm of posterior wall of urinary bladder                       | FALSE |
| CCI score | 535274723 | 24296    | Charlson - Cancer | TRUE | 1 | Primary malignant neoplasm of pituitary gland                                         | FALSE |
| CCI score | 535274723 | 25748    | Charlson - Cancer | TRUE | 1 | Overlapping malignant neoplasm of esophagus                                           | FALSE |

**White Paper:** Can longitudinal electronic health record data identify patients at higher risk of developing long COVID?

|           |           |        |                   |      |   |                                                                     |       |
|-----------|-----------|--------|-------------------|------|---|---------------------------------------------------------------------|-------|
| CCI score | 535274723 | 75488  | Charlson - Cancer | TRUE | 1 | Primary malignant neoplasm of vertebral column                      | FALSE |
| CCI score | 535274723 | 81237  | Charlson - Cancer | TRUE | 1 | Primary malignant neoplasm of upper limb bones and scapula          | FALSE |
| CCI score | 535274723 | 132841 | Charlson - Cancer | TRUE | 1 | Malignant lymphoma of lymph nodes of multiple sites                 | FALSE |
| CCI score | 535274723 | 132850 | Charlson - Cancer | TRUE | 1 | Myeloid leukemia in remission                                       | FALSE |
| CCI score | 535274723 | 135491 | Charlson - Cancer | TRUE | 1 | Primary malignant neoplasm of spinal cord                           | FALSE |
| CCI score | 535274723 | 135496 | Charlson - Cancer | TRUE | 1 | Acute leukemia in remission                                         | FALSE |
| CCI score | 535274723 | 136639 | Charlson - Cancer | TRUE | 1 | Primary malignant neoplasm of sphenoidal sinus                      | FALSE |
| CCI score | 535274723 | 138074 | Charlson - Cancer | TRUE | 1 | Primary malignant neoplasm of vermilion border of upper lip         | FALSE |
| CCI score | 535274723 | 140046 | Charlson - Cancer | TRUE | 1 | Primary malignant neoplasm of ethmoidal sinus                       | FALSE |
| CCI score | 535274723 | 140057 | Charlson - Cancer | TRUE | 1 | Chronic leukemia                                                    | FALSE |
| CCI score | 535274723 | 140666 | Charlson - Cancer | TRUE | 1 | Myeloid leukemia                                                    | FALSE |
| CCI score | 535274723 | 140955 | Charlson - Cancer | TRUE | 1 | Overlapping malignant neoplasm of floor of mouth                    | FALSE |
| CCI score | 535274723 | 193155 | Charlson - Cancer | TRUE | 1 | Carcinoid tumor of large intestine                                  | FALSE |
| CCI score | 535274723 | 193434 | Charlson - Cancer | TRUE | 1 | Hodgkin's disease, nodular sclerosis of intra-abdominal lymph nodes | FALSE |
| CCI score | 535274723 | 194594 | Charlson - Cancer | TRUE | 1 | Hodgkin's disease, mixed cellularity of intrapelvic lymph nodes     | FALSE |
| CCI score | 535274723 | 194878 | Charlson - Cancer | TRUE | 1 | Nodular lymphoma of extranodal AND/OR solid organ site              | FALSE |
| CCI score | 535274723 | 195483 | Charlson - Cancer | TRUE | 1 | Primary malignant neoplasm of penis                                 | FALSE |
| CCI score | 535274723 | 196048 | Charlson - Cancer | TRUE | 1 | Primary malignant neoplasm of vagina                                | FALSE |
| CCI score | 535274723 | 197806 | Charlson - Cancer | TRUE | 1 | Primary malignant neoplasm of gallbladder                           | FALSE |
| CCI score | 535274723 | 198088 | Charlson - Cancer | TRUE | 1 | Nodular lymphoma of intrapelvic lymph nodes                         | FALSE |
| CCI score | 535274723 | 198091 | Charlson - Cancer | TRUE | 1 | Primary malignant neoplasm of retroperitoneum                       | FALSE |
| CCI score | 535274723 | 198092 | Charlson - Cancer | TRUE | 1 | Overlapping malignant neoplasm of retroperitoneum and peritoneum    | FALSE |
| CCI score | 535274723 | 198988 | Charlson - Cancer | TRUE | 1 | Primary malignant neoplasm of pelvis                                | FALSE |
| CCI score | 535274723 | 201231 | Charlson - Cancer | TRUE | 1 | Malignant neoplasm of connective and soft tissue of pelvis          | FALSE |
| CCI score | 535274723 | 201517 | Charlson - Cancer | TRUE | 1 | Primary malignant neoplasm of urachus                               | FALSE |
| CCI score | 535274723 | 201518 | Charlson - Cancer | TRUE | 1 | Primary malignant neoplasm of lower limb                            | FALSE |
| CCI score | 535274723 | 201519 | Charlson - Cancer | TRUE | 1 | Primary malignant neoplasm of liver                                 | FALSE |
| CCI score | 535274723 | 201801 | Charlson - Cancer | TRUE | 1 | Primary malignant neoplasm of fallopian tube                        | FALSE |
| CCI score | 535274723 | 258375 | Charlson - Cancer | TRUE | 1 | Overlapping malignant neoplasm of bronchus and lung                 | FALSE |
| CCI score | 535274723 | 261236 | Charlson - Cancer | TRUE | 1 | Primary malignant neoplasm of upper lobe, bronchus or lung          | FALSE |

**White Paper:** Can longitudinal electronic health record data identify patients at higher risk of developing long COVID?

|           |           |         |                   |      |   |                                                                                          |       |
|-----------|-----------|---------|-------------------|------|---|------------------------------------------------------------------------------------------|-------|
| CCI score | 535274723 | 315481  | Charlson - Cancer | TRUE | 1 | Burkitt's lymphoma of lymph nodes of multiple sites                                      | FALSE |
| CCI score | 535274723 | 372567  | Charlson - Cancer | TRUE | 1 | Primary malignant neoplasm of lacrimal gland                                             | FALSE |
| CCI score | 535274723 | 379756  | Charlson - Cancer | TRUE | 1 | Primary malignant neoplasm of mandible                                                   | FALSE |
| CCI score | 535274723 | 432559  | Charlson - Cancer | TRUE | 1 | Primary malignant neoplasm of occipital lobe                                             | FALSE |
| CCI score | 535274723 | 432837  | Charlson - Cancer | TRUE | 1 | Primary malignant neoplasm of cecum                                                      | FALSE |
| CCI score | 535274723 | 432838  | Charlson - Cancer | TRUE | 1 | Primary malignant neoplasm of cardia of stomach                                          | FALSE |
| CCI score | 535274723 | 432843  | Charlson - Cancer | TRUE | 1 | Primary malignant neoplasm of tail of pancreas                                           | FALSE |
| CCI score | 535274723 | 436054  | Charlson - Cancer | TRUE | 1 | Primary malignant neoplasm of undescended testis                                         | FALSE |
| CCI score | 535274723 | 436344  | Charlson - Cancer | TRUE | 1 | Primary malignant neoplasm of posterior wall of nasopharynx                              | FALSE |
| CCI score | 535274723 | 437238  | Charlson - Cancer | TRUE | 1 | Carcinoid tumor of appendix                                                              | FALSE |
| CCI score | 535274723 | 438090  | Charlson - Cancer | TRUE | 1 | Overlapping malignant neoplasm of rectum, anus and anal canal                            | FALSE |
| CCI score | 535274723 | 438691  | Charlson - Cancer | TRUE | 1 | Overlapping malignant neoplasm of oropharynx                                             | FALSE |
| CCI score | 535274723 | 439265  | Charlson - Cancer | TRUE | 1 | Sézary's disease of intrathoracic lymph nodes                                            | FALSE |
| CCI score | 535274723 | 439267  | Charlson - Cancer | TRUE | 1 | Sézary's disease of intra-abdominal lymph nodes                                          | FALSE |
| CCI score | 535274723 | 439746  | Charlson - Cancer | TRUE | 1 | Primary malignant neoplasm of hypopharynx                                                | FALSE |
| CCI score | 535274723 | 440058  | Charlson - Cancer | TRUE | 1 | Malignant lymphoma of extranodal AND/OR solid organ site                                 | FALSE |
| CCI score | 535274723 | 441515  | Charlson - Cancer | TRUE | 1 | Primary malignant neoplasm of lower outer quadrant of female breast                      | FALSE |
| CCI score | 535274723 | 442131  | Charlson - Cancer | TRUE | 1 | Primary malignant neoplasm of head                                                       | FALSE |
| CCI score | 535274723 | 442157  | Charlson - Cancer | TRUE | 1 | Hodgkin's disease, nodular sclerosis of lymph nodes of inguinal region AND/OR lower limb | FALSE |
| CCI score | 535274723 | 442159  | Charlson - Cancer | TRUE | 1 | Hodgkin's disease, mixed cellularity of spleen                                           | FALSE |
| CCI score | 535274723 | 443381  | Charlson - Cancer | TRUE | 1 | Malignant tumor of sigmoid colon                                                         | FALSE |
| CCI score | 535274723 | 760936  | Charlson - Cancer | TRUE | 1 | Plasma cell leukemia in relapse                                                          | FALSE |
| CCI score | 535274723 | 4002357 | Charlson - Cancer | TRUE | 1 | Follicular non-Hodgkin's lymphoma, small cleaved cell (clinical)                         | FALSE |
| CCI score | 535274723 | 4003175 | Charlson - Cancer | TRUE | 1 | Primary malignant neoplasm of peripheral nerves of upper limb                            | FALSE |
| CCI score | 535274723 | 4003693 | Charlson - Cancer | TRUE | 1 | Overlapping malignant neoplasm of brain                                                  | FALSE |
| CCI score | 535274723 | 4038841 | Charlson - Cancer | TRUE | 1 | Lymphocyte-rich classical Hodgkin lymphoma                                               | FALSE |
| CCI score | 535274723 | 4040379 | Charlson - Cancer | TRUE | 1 | Malignant mast cell tumor (clinical)                                                     | FALSE |
| CCI score | 535274723 | 4040380 | Charlson - Cancer | TRUE | 1 | Mycosis fungoides (clinical)                                                             | FALSE |
| CCI score | 535274723 | 4041800 | Charlson - Cancer | TRUE | 1 | Burkitt's lymphoma (clinical)                                                            | FALSE |



**White Paper:** Can longitudinal electronic health record data identify patients at higher risk of developing long COVID?

|           |           |          |                   |      |   |                                                                        |       |
|-----------|-----------|----------|-------------------|------|---|------------------------------------------------------------------------|-------|
| CCI score | 535274723 | 4089777  | Charlson - Cancer | TRUE | 1 | Malignant neoplasm of connective and soft tissue of hip and lower limb | FALSE |
| CCI score | 535274723 | 4091467  | Charlson - Cancer | TRUE | 1 | Malignant neoplasm of axillary tail of female breast                   | FALSE |
| CCI score | 535274723 | 4092513  | Charlson - Cancer | TRUE | 1 | Malignant neoplasm, overlapping lesion of breast                       | FALSE |
| CCI score | 535274723 | 4094863  | Charlson - Cancer | TRUE | 1 | Malignant tumor of Meckel's diverticulum                               | FALSE |
| CCI score | 535274723 | 4095018  | Charlson - Cancer | TRUE | 1 | Malignant neoplasm of connective and soft tissue of abdomen            | FALSE |
| CCI score | 535274723 | 4095589  | Charlson - Cancer | TRUE | 1 | Malignant melanoma of ear and/or external auditory canal               | FALSE |
| CCI score | 535274723 | 4095592  | Charlson - Cancer | TRUE | 1 | Malignant melanoma of scalp and/or neck                                | FALSE |
| CCI score | 535274723 | 4115271  | Charlson - Cancer | TRUE | 1 | Sarcoma of liver                                                       | FALSE |
| CCI score | 535274723 | 4147164  | Charlson - Cancer | TRUE | 1 | Malignant tumor of lymphoid hemopoietic and related tissue             | FALSE |
| CCI score | 535274723 | 4151263  | Charlson - Cancer | TRUE | 1 | Malignant melanoma of lower limb                                       | FALSE |
| CCI score | 535274723 | 4160342  | Charlson - Cancer | TRUE | 1 | Neoplasm of eye region                                                 | FALSE |
| CCI score | 535274723 | 4187851  | Charlson - Cancer | TRUE | 1 | Primary malignant neoplasm of breast lower inner quadrant              | FALSE |
| CCI score | 535274723 | 4189938  | Charlson - Cancer | TRUE | 1 | Acute monocytic/monoblastic leukemia                                   | FALSE |
| CCI score | 535274723 | 4216139  | Charlson - Cancer | TRUE | 1 | Plasmacytoma                                                           | FALSE |
| CCI score | 535274723 | 4246127  | Charlson - Cancer | TRUE | 1 | Malignant neoplasm of liver                                            | FALSE |
| CCI score | 535274723 | 4246141  | Charlson - Cancer | TRUE | 1 | Primary malignant neoplasm of pelvic bone                              | FALSE |
| CCI score | 535274723 | 4247836  | Charlson - Cancer | TRUE | 1 | Primary malignant neoplasm of major salivary gland                     | FALSE |
| CCI score | 535274723 | 4247842  | Charlson - Cancer | TRUE | 1 | Primary malignant neoplasm of myometrium                               | FALSE |
| CCI score | 535274723 | 4311499  | Charlson - Cancer | TRUE | 1 | Primary malignant neoplasm of respiratory tract                        | FALSE |
| CCI score | 535274723 | 4334322  | Charlson - Cancer | TRUE | 1 | Malignant neoplasm of lower respiratory tract                          | FALSE |
| CCI score | 535274723 | 37017321 | Charlson - Cancer | TRUE | 1 | Malignant carcinoid tumor of kidney                                    | FALSE |
| CCI score | 535274723 | 37018875 | Charlson - Cancer | TRUE | 1 | Malignant neuroendocrine tumor                                         | FALSE |
| CCI score | 535274723 | 40492268 | Charlson - Cancer | TRUE | 1 | Myelodysplastic/myeloproliferative disease                             | FALSE |
| CCI score | 535274723 | 45767695 | Charlson - Cancer | TRUE | 1 | Metastatic carcinoid tumor                                             | FALSE |
| CCI score | 535274723 | 46271402 | Charlson - Cancer | TRUE | 1 | Malignant carcinoid tumor of small intestine                           | FALSE |
| CCI score | 535274723 | 27235    | Charlson - Cancer | TRUE | 1 | Primary malignant neoplasm of carotid body                             | FALSE |
| CCI score | 535274723 | 74582    | Charlson - Cancer | TRUE | 1 | Primary malignant neoplasm of rectum                                   | FALSE |
| CCI score | 535274723 | 79749    | Charlson - Cancer | TRUE | 1 | Primary malignant neoplasm of body of penis                            | FALSE |
| CCI score | 535274723 | 80665    | Charlson - Cancer | TRUE | 1 | Malignant neoplasm of thorax                                           | FALSE |
| CCI score | 535274723 | 81239    | Charlson - Cancer | TRUE | 1 | Primary malignant neoplasm of upper limb                               | FALSE |

**White Paper:** Can longitudinal electronic health record data identify patients at higher risk of developing long COVID?

|           |           |        |                   |      |   |                                                                       |       |
|-----------|-----------|--------|-------------------|------|---|-----------------------------------------------------------------------|-------|
| CCI score | 535274723 | 132258 | Charlson - Cancer | TRUE | 1 | Primary malignant neoplasm of frontal sinus                           | FALSE |
| CCI score | 535274723 | 133420 | Charlson - Cancer | TRUE | 1 | Primary malignant neoplasm of endocrine gland                         | FALSE |
| CCI score | 535274723 | 133710 | Charlson - Cancer | TRUE | 1 | Overlapping malignant neoplasm of lip                                 | FALSE |
| CCI score | 535274723 | 134579 | Charlson - Cancer | TRUE | 1 | Primary malignant neoplasm of buccal mucosa                           | FALSE |
| CCI score | 535274723 | 134879 | Charlson - Cancer | TRUE | 1 | Mycosis fungoides of intrathoracic lymph nodes                        | FALSE |
| CCI score | 535274723 | 135204 | Charlson - Cancer | TRUE | 1 | Mycosis fungoides of extranodal AND/OR solid organ site               | FALSE |
| CCI score | 535274723 | 137219 | Charlson - Cancer | TRUE | 1 | Primary malignant neoplasm of inner aspect of lower lip               | FALSE |
| CCI score | 535274723 | 137800 | Charlson - Cancer | TRUE | 1 | Primary malignant neoplasm of maxillary sinus                         | FALSE |
| CCI score | 535274723 | 138351 | Charlson - Cancer | TRUE | 1 | Primary malignant neoplasm of inner aspect of upper lip               | FALSE |
| CCI score | 535274723 | 138377 | Charlson - Cancer | TRUE | 1 | Mycosis fungoides of lymph nodes of head, face AND/OR neck            | FALSE |
| CCI score | 535274723 | 140967 | Charlson - Cancer | TRUE | 1 | Myeloid sarcoma                                                       | FALSE |
| CCI score | 535274723 | 141816 | Charlson - Cancer | TRUE | 1 | Acute lymphoid leukemia in remission                                  | FALSE |
| CCI score | 535274723 | 192261 | Charlson - Cancer | TRUE | 1 | Overlapping malignant neoplasm of pancreas                            | FALSE |
| CCI score | 535274723 | 193422 | Charlson - Cancer | TRUE | 1 | Primary malignant neoplasm of body of stomach                         | FALSE |
| CCI score | 535274723 | 195195 | Charlson - Cancer | TRUE | 1 | Malignant lymphoma of intrapelvic lymph nodes                         | FALSE |
| CCI score | 535274723 | 195482 | Charlson - Cancer | TRUE | 1 | Primary malignant neoplasm of intestinal tract                        | FALSE |
| CCI score | 535274723 | 195761 | Charlson - Cancer | TRUE | 1 | Hodgkin's disease of intrapelvic lymph nodes                          | FALSE |
| CCI score | 535274723 | 198381 | Charlson - Cancer | TRUE | 1 | Hodgkin's disease, lymphocytic-histiocytic predominance of spleen     | FALSE |
| CCI score | 535274723 | 200051 | Charlson - Cancer | TRUE | 1 | Primary malignant neoplasm of ovary                                   | FALSE |
| CCI score | 535274723 | 200343 | Charlson - Cancer | TRUE | 1 | Malignant lymphoma of spleen                                          | FALSE |
| CCI score | 535274723 | 200349 | Charlson - Cancer | TRUE | 1 | Malignant lymphoma of intra-abdominal lymph nodes                     | FALSE |
| CCI score | 535274723 | 200962 | Charlson - Cancer | TRUE | 1 | Primary malignant neoplasm of prostate                                | FALSE |
| CCI score | 535274723 | 201238 | Charlson - Cancer | TRUE | 1 | Primary malignant neoplasm of female genital organ                    | FALSE |
| CCI score | 535274723 | 252840 | Charlson - Cancer | TRUE | 1 | Primary malignant neoplasm of upper respiratory tract                 | FALSE |
| CCI score | 535274723 | 254282 | Charlson - Cancer | TRUE | 1 | Primary malignant neoplasm of soft palate                             | FALSE |
| CCI score | 535274723 | 256633 | Charlson - Cancer | TRUE | 1 | Primary malignant neoplasm of base of tongue                          | FALSE |
| CCI score | 535274723 | 258981 | Charlson - Cancer | TRUE | 1 | Kaposi's sarcoma of skin                                              | FALSE |
| CCI score | 535274723 | 261808 | Charlson - Cancer | TRUE | 1 | Primary malignant neoplasm of vestibule of mouth                      | FALSE |
| CCI score | 535274723 | 315202 | Charlson - Cancer | TRUE | 1 | Hodgkin's disease, mixed cellularity of lymph nodes of multiple sites | FALSE |
| CCI score | 535274723 | 320347 | Charlson - Cancer | TRUE | 1 | Nodular lymphoma of lymph nodes of multiple sites                     | FALSE |

**White Paper:** Can longitudinal electronic health record data identify patients at higher risk of developing long COVID?

|           |           |        |                   |      |   |                                                                                 |       |
|-----------|-----------|--------|-------------------|------|---|---------------------------------------------------------------------------------|-------|
| CCI score | 535274723 | 374874 | Charlson - Cancer | TRUE | 1 | Primary malignant neoplasm of eye                                               | FALSE |
| CCI score | 535274723 | 376647 | Charlson - Cancer | TRUE | 1 | Primary malignant neoplasm of soft tissues                                      | FALSE |
| CCI score | 535274723 | 380055 | Charlson - Cancer | TRUE | 1 | Primary malignant neoplasm of brain                                             | FALSE |
| CCI score | 535274723 | 432260 | Charlson - Cancer | TRUE | 1 | Primary malignant neoplasm of upper third of esophagus                          | FALSE |
| CCI score | 535274723 | 432262 | Charlson - Cancer | TRUE | 1 | Primary malignant neoplasm of trachea                                           | FALSE |
| CCI score | 535274723 | 432833 | Charlson - Cancer | TRUE | 1 | Primary malignant neoplasm of oropharynx                                        | FALSE |
| CCI score | 535274723 | 434299 | Charlson - Cancer | TRUE | 1 | Hodgkin's disease, mixed cellularity of lymph nodes of axilla AND/OR upper limb | FALSE |
| CCI score | 535274723 | 434302 | Charlson - Cancer | TRUE | 1 | Hodgkin's disease, nodular sclerosis of extranodal AND/OR solid organ site      | FALSE |
| CCI score | 535274723 | 434584 | Charlson - Cancer | TRUE | 1 | Kaposi's sarcoma (clinical)                                                     | FALSE |
| CCI score | 535274723 | 434590 | Charlson - Cancer | TRUE | 1 | Malignant melanoma of skin of eyelid                                            | FALSE |
| CCI score | 535274723 | 434881 | Charlson - Cancer | TRUE | 1 | Peripheral T-cell lymphoma (clinical)                                           | FALSE |
| CCI score | 535274723 | 435487 | Charlson - Cancer | TRUE | 1 | Primary malignant neoplasm of posterior mediastinum                             | FALSE |
| CCI score | 535274723 | 435752 | Charlson - Cancer | TRUE | 1 | Primary malignant neoplasm of duodenum                                          | FALSE |
| CCI score | 535274723 | 435753 | Charlson - Cancer | TRUE | 1 | Malignant lymphoma of intrathoracic lymph nodes                                 | FALSE |
| CCI score | 535274723 | 436042 | Charlson - Cancer | TRUE | 1 | Primary malignant neoplasm of anterior two-thirds of tongue                     | FALSE |
| CCI score | 535274723 | 436043 | Charlson - Cancer | TRUE | 1 | Overlapping malignant neoplasm of tongue                                        | FALSE |
| CCI score | 535274723 | 436352 | Charlson - Cancer | TRUE | 1 | Primary malignant neoplasm of laryngeal cartilage                               | FALSE |
| CCI score | 535274723 | 436643 | Charlson - Cancer | TRUE | 1 | Primary malignant neoplasm of anterior aspect of epiglottis                     | FALSE |
| CCI score | 535274723 | 436651 | Charlson - Cancer | TRUE | 1 | Hodgkin's disease of extranodal AND/OR solid organ site                         | FALSE |
| CCI score | 535274723 | 437498 | Charlson - Cancer | TRUE | 1 | Primary malignant neoplasm of tongue                                            | FALSE |
| CCI score | 535274723 | 437501 | Charlson - Cancer | TRUE | 1 | Primary malignant neoplasm of labia majora                                      | FALSE |
| CCI score | 535274723 | 437504 | Charlson - Cancer | TRUE | 1 | Burkitt's tumor of lymph nodes of head, face AND/OR neck                        | FALSE |
| CCI score | 535274723 | 437818 | Charlson - Cancer | TRUE | 1 | Hodgkin's disease of lymph nodes of head, face AND/OR neck                      | FALSE |
| CCI score | 535274723 | 438089 | Charlson - Cancer | TRUE | 1 | Primary malignant neoplasm of pyloric antrum                                    | FALSE |
| CCI score | 535274723 | 438360 | Charlson - Cancer | TRUE | 1 | Primary malignant neoplasm of vallecula                                         | FALSE |
| CCI score | 535274723 | 438699 | Charlson - Cancer | TRUE | 1 | Primary malignant neoplasm of rectosigmoid junction                             | FALSE |
| CCI score | 535274723 | 439281 | Charlson - Cancer | TRUE | 1 | Hodgkin's disease, lymphocytic depletion of spleen                              | FALSE |
| CCI score | 535274723 | 439404 | Charlson - Cancer | TRUE | 1 | Primary malignant neoplasm of oral cavity                                       | FALSE |
| CCI score | 535274723 | 440044 | Charlson - Cancer | TRUE | 1 | Overlapping malignant neoplasm of hypopharynx                                   | FALSE |
| CCI score | 535274723 | 440351 | Charlson - Cancer | TRUE | 1 | Hodgkin's disease, lymphocytic-histiocytic predominance of intrathoracic lymph  | FALSE |

**White Paper:** Can longitudinal electronic health record data identify patients at higher risk of developing long COVID?

|           |           |         |                   |      | nodes                                                                                                         |       |
|-----------|-----------|---------|-------------------|------|---------------------------------------------------------------------------------------------------------------|-------|
| CCI score | 535274723 | 441800  | Charlson - Cancer | TRUE | 1 Primary malignant neoplasm of descending colon                                                              | FALSE |
| CCI score | 535274723 | 442150  | Charlson - Cancer | TRUE | 1 Hodgkin's disease, lymphocytic depletion of lymph nodes of inguinal region AND/OR lower limb                | FALSE |
| CCI score | 535274723 | 442162  | Charlson - Cancer | TRUE | 1 Hodgkin's disease, lymphocytic-histiocytic predominance of lymph nodes of inguinal region AND/OR lower limb | FALSE |
| CCI score | 535274723 | 443384  | Charlson - Cancer | TRUE | 1 Malignant tumor of transverse colon                                                                         | FALSE |
| CCI score | 535274723 | 443719  | Charlson - Cancer | TRUE | 1 Relapsing chronic myeloid leukemia                                                                          | FALSE |
| CCI score | 535274723 | 4001170 | Charlson - Cancer | TRUE | 1 Overlapping malignant neoplasm of palate                                                                    | FALSE |
| CCI score | 535274723 | 4001328 | Charlson - Cancer | TRUE | 1 Diffuse non-Hodgkin's lymphoma, lymphoblastic (clinical)                                                    | FALSE |
| CCI score | 535274723 | 4001664 | Charlson - Cancer | TRUE | 1 Intrahepatic bile duct carcinoma                                                                            | FALSE |
| CCI score | 535274723 | 4001666 | Charlson - Cancer | TRUE | 1 Mesothelioma of peritoneum                                                                                  | FALSE |
| CCI score | 535274723 | 4002494 | Charlson - Cancer | TRUE | 1 Histiocytic sarcoma (clinical)                                                                              | FALSE |
| CCI score | 535274723 | 4002498 | Charlson - Cancer | TRUE | 1 Overlapping malignant neoplasm of tonsil                                                                    | FALSE |
| CCI score | 535274723 | 4003021 | Charlson - Cancer | TRUE | 1 Angiosarcoma of liver                                                                                       | FALSE |
| CCI score | 535274723 | 4003179 | Charlson - Cancer | TRUE | 1 Primary malignant neoplasm of peripheral nerves of trunk                                                    | FALSE |
| CCI score | 535274723 | 4003833 | Charlson - Cancer | TRUE | 1 Follicular non-Hodgkin's lymphoma, large cell (clinical)                                                    | FALSE |
| CCI score | 535274723 | 4003834 | Charlson - Cancer | TRUE | 1 Malignant immunoproliferative disease (clinical)                                                            | FALSE |
| CCI score | 535274723 | 4038842 | Charlson - Cancer | TRUE | 1 Hodgkin's disease, nodular sclerosis (clinical)                                                             | FALSE |
| CCI score | 535274723 | 4082311 | Charlson - Cancer | TRUE | 1 B-cell chronic lymphocytic leukemia                                                                         | FALSE |
| CCI score | 535274723 | 4092358 | Charlson - Cancer | TRUE | 1 Malignant neoplasm of connective and soft tissue of thorax                                                  | FALSE |
| CCI score | 535274723 | 4097284 | Charlson - Cancer | TRUE | 1 Malignant neoplasm of peripheral nerve of pelvis                                                            | FALSE |
| CCI score | 535274723 | 4114198 | Charlson - Cancer | TRUE | 1 Malignant tumor of olfactory tract                                                                          | FALSE |
| CCI score | 535274723 | 4131761 | Charlson - Cancer | TRUE | 1 Neoplasm of placenta                                                                                        | FALSE |
| CCI score | 535274723 | 4157454 | Charlson - Cancer | TRUE | 1 Primary malignant neoplasm of lower lobe, bronchus or lung                                                  | FALSE |
| CCI score | 535274723 | 4187850 | Charlson - Cancer | TRUE | 1 Primary malignant neoplasm of breast upper outer quadrant                                                   | FALSE |
| CCI score | 535274723 | 4225982 | Charlson - Cancer | TRUE | 1 Mature T-cell AND/OR NK cell neoplasm                                                                       | FALSE |
| CCI score | 535274723 | 4244051 | Charlson - Cancer | TRUE | 1 Malignant melanoma of skin of breast                                                                        | FALSE |
| CCI score | 535274723 | 4246029 | Charlson - Cancer | TRUE | 1 Primary malignant neoplasm of cauda equina                                                                  | FALSE |
| CCI score | 535274723 | 4311480 | Charlson - Cancer | TRUE | 1 Primary malignant neoplasm of ileum                                                                         | FALSE |
| CCI score | 535274723 | 4312698 | Charlson - Cancer | TRUE | 1 Primary malignant neoplasm of trunk                                                                         | FALSE |

**White Paper:** Can longitudinal electronic health record data identify patients at higher risk of developing long COVID?

|           |           |          |                   |      |   |                                                                                 |       |
|-----------|-----------|----------|-------------------|------|---|---------------------------------------------------------------------------------|-------|
| CCI score | 535274723 | 36716501 | Charlson - Cancer | TRUE | 1 | Primary malignant epithelial neoplasm of nasopharynx                            | FALSE |
| CCI score | 535274723 | 40479608 | Charlson - Cancer | TRUE | 1 | Mantle cell lymphoma of spleen                                                  | FALSE |
| CCI score | 535274723 | 40482847 | Charlson - Cancer | TRUE | 1 | Juvenile myelomonocytic leukemia                                                | FALSE |
| CCI score | 535274723 | 40490328 | Charlson - Cancer | TRUE | 1 | Gastrointestinal stromal tumor of large intestine                               | FALSE |
| CCI score | 535274723 | 25486    | Charlson - Cancer | TRUE | 1 | Primary malignant neoplasm of islets of Langerhans                              | FALSE |
| CCI score | 535274723 | 76914    | Charlson - Cancer | TRUE | 1 | Primary malignant neoplasm of bone                                              | FALSE |
| CCI score | 535274723 | 79740    | Charlson - Cancer | TRUE | 1 | Overlapping malignant neoplasm of colon                                         | FALSE |
| CCI score | 535274723 | 133438   | Charlson - Cancer | TRUE | 1 | Chronic lymphoid leukemia in remission                                          | FALSE |
| CCI score | 535274723 | 133713   | Charlson - Cancer | TRUE | 1 | Malignant melanoma of skin of face                                              | FALSE |
| CCI score | 535274723 | 135762   | Charlson - Cancer | TRUE | 1 | Acute myeloid leukemia in remission                                             | FALSE |
| CCI score | 535274723 | 135765   | Charlson - Cancer | TRUE | 1 | Sézary's disease of lymph nodes of head, face AND/OR neck                       | FALSE |
| CCI score | 535274723 | 138708   | Charlson - Cancer | TRUE | 1 | Acute leukemia                                                                  | FALSE |
| CCI score | 535274723 | 140352   | Charlson - Cancer | TRUE | 1 | Acute myeloid leukemia, disease                                                 | FALSE |
| CCI score | 535274723 | 140950   | Charlson - Cancer | TRUE | 1 | Primary malignant neoplasm of gum                                               | FALSE |
| CCI score | 535274723 | 141232   | Charlson - Cancer | TRUE | 1 | Malignant melanoma of skin                                                      | FALSE |
| CCI score | 535274723 | 192268   | Charlson - Cancer | TRUE | 1 | Hodgkin's disease, mixed cellularity of intra-abdominal lymph nodes             | FALSE |
| CCI score | 535274723 | 193428   | Charlson - Cancer | TRUE | 1 | Burkitt's lymphoma of intrapelvic lymph nodes                                   | FALSE |
| CCI score | 535274723 | 196360   | Charlson - Cancer | TRUE | 1 | Primary malignant neoplasm of bladder                                           | FALSE |
| CCI score | 535274723 | 196645   | Charlson - Cancer | TRUE | 1 | Overlapping malignant neoplasm of male genital organs                           | FALSE |
| CCI score | 535274723 | 197506   | Charlson - Cancer | TRUE | 1 | Malignant neoplasm of abdomen                                                   | FALSE |
| CCI score | 535274723 | 198695   | Charlson - Cancer | TRUE | 1 | Overlapping malignant neoplasm of biliary tract                                 | FALSE |
| CCI score | 535274723 | 198985   | Charlson - Cancer | TRUE | 1 | Primary malignant neoplasm of kidney                                            | FALSE |
| CCI score | 535274723 | 200338   | Charlson - Cancer | TRUE | 1 | Nodular lymphoma of intra-abdominal lymph nodes                                 | FALSE |
| CCI score | 535274723 | 256646   | Charlson - Cancer | TRUE | 1 | Primary malignant neoplasm of middle lobe, bronchus or lung                     | FALSE |
| CCI score | 535274723 | 259755   | Charlson - Cancer | TRUE | 1 | Primary malignant neoplasm of subglottis                                        | FALSE |
| CCI score | 535274723 | 314600   | Charlson - Cancer | TRUE | 1 | Hodgkin's disease, nodular sclerosis of lymph nodes of axilla AND/OR upper limb | FALSE |
| CCI score | 535274723 | 432254   | Charlson - Cancer | TRUE | 1 | Primary malignant neoplasm of Waldeyer's ring                                   | FALSE |
| CCI score | 535274723 | 432263   | Charlson - Cancer | TRUE | 1 | Primary malignant neoplasm of lower inner quadrant of female breast             | FALSE |
| CCI score | 535274723 | 432844   | Charlson - Cancer | TRUE | 1 | Primary malignant neoplasm of anterior mediastinum                              | FALSE |
| CCI score | 535274723 | 434285   | Charlson - Cancer | TRUE | 1 | Primary malignant neoplasm of uvula                                             | FALSE |

**White Paper:** Can longitudinal electronic health record data identify patients at higher risk of developing long COVID?

|           |           |         |                   |      |   |                                                                               |       |
|-----------|-----------|---------|-------------------|------|---|-------------------------------------------------------------------------------|-------|
| CCI score | 535274723 | 434292  | Charlson - Cancer | TRUE | 1 | Primary malignant neoplasm of lesser curvature of stomach                     | FALSE |
| CCI score | 535274723 | 434588  | Charlson - Cancer | TRUE | 1 | Primary malignant neoplasm of parotid gland                                   | FALSE |
| CCI score | 535274723 | 434880  | Charlson - Cancer | TRUE | 1 | Primary malignant neoplasm of short bone of lower limb                        | FALSE |
| CCI score | 535274723 | 435492  | Charlson - Cancer | TRUE | 1 | Nodular lymphoma of intrathoracic lymph nodes                                 | FALSE |
| CCI score | 535274723 | 435758  | Charlson - Cancer | TRUE | 1 | Burkitt's tumor of extranodal AND/OR solid organ site                         | FALSE |
| CCI score | 535274723 | 436045  | Charlson - Cancer | TRUE | 1 | Malignant neoplasm of lip, oral cavity and pharynx                            | FALSE |
| CCI score | 535274723 | 436358  | Charlson - Cancer | TRUE | 1 | Primary malignant neoplasm of exocervix                                       | FALSE |
| CCI score | 535274723 | 436913  | Charlson - Cancer | TRUE | 1 | Primary malignant neoplasm of jejunum                                         | FALSE |
| CCI score | 535274723 | 436922  | Charlson - Cancer | TRUE | 1 | Primary malignant neoplasm of postcricoid region                              | FALSE |
| CCI score | 535274723 | 437233  | Charlson - Cancer | TRUE | 1 | Multiple myeloma                                                              | FALSE |
| CCI score | 535274723 | 437805  | Charlson - Cancer | TRUE | 1 | Primary malignant neoplasm of middle third of esophagus                       | FALSE |
| CCI score | 535274723 | 438982  | Charlson - Cancer | TRUE | 1 | Primary malignant neoplasm of anterior portion of floor of mouth              | FALSE |
| CCI score | 535274723 | 439738  | Charlson - Cancer | TRUE | 1 | Primary malignant neoplasm of sublingual gland                                | FALSE |
| CCI score | 535274723 | 439739  | Charlson - Cancer | TRUE | 1 | Primary malignant neoplasm of posterior wall of oropharynx                    | FALSE |
| CCI score | 535274723 | 441225  | Charlson - Cancer | TRUE | 1 | Primary malignant neoplasm of ampulla of Vater                                | FALSE |
| CCI score | 535274723 | 441802  | Charlson - Cancer | TRUE | 1 | Primary malignant neoplasm of labia minora                                    | FALSE |
| CCI score | 535274723 | 442122  | Charlson - Cancer | TRUE | 1 | Primary malignant neoplasm of paraganglion                                    | FALSE |
| CCI score | 535274723 | 442134  | Charlson - Cancer | TRUE | 1 | Primary malignant neoplasm of craniopharyngeal duct                           | FALSE |
| CCI score | 535274723 | 442158  | Charlson - Cancer | TRUE | 1 | Hodgkin's disease, nodular sclerosis of lymph nodes of head, face AND/OR neck | FALSE |
| CCI score | 535274723 | 443391  | Charlson - Cancer | TRUE | 1 | Malignant tumor of cecum                                                      | FALSE |
| CCI score | 535274723 | 443565  | Charlson - Cancer | TRUE | 1 | Carcinoid tumor of gastrointestinal tract                                     | FALSE |
| CCI score | 535274723 | 4002497 | Charlson - Cancer | TRUE | 1 | Acute promyelocytic leukemia, FAB M3                                          | FALSE |
| CCI score | 535274723 | 4003027 | Charlson - Cancer | TRUE | 1 | Overlapping malignant neoplasm of penis                                       | FALSE |
| CCI score | 535274723 | 4003188 | Charlson - Cancer | TRUE | 1 | Adult T-cell leukemia/lymphoma                                                | FALSE |
| CCI score | 535274723 | 4003674 | Charlson - Cancer | TRUE | 1 | Primary malignant neoplasm of branchial cleft                                 | FALSE |
| CCI score | 535274723 | 4003836 | Charlson - Cancer | TRUE | 1 | Immunoproliferative small intestinal disease (clinical)                       | FALSE |
| CCI score | 535274723 | 4033318 | Charlson - Cancer | TRUE | 1 | Overlapping malignant neoplasm of bone and articular cartilage of limbs       | FALSE |
| CCI score | 535274723 | 4038835 | Charlson - Cancer | TRUE | 1 | Hodgkin's disease (clinical)                                                  | FALSE |
| CCI score | 535274723 | 4044708 | Charlson - Cancer | TRUE | 1 | Langerhans cell histiocytosis, unifocal (clinical)                            | FALSE |
| CCI score | 535274723 | 4054513 | Charlson - Cancer | TRUE | 1 | Neoplasm of accessory sinus                                                   | FALSE |

**White Paper:** Can longitudinal electronic health record data identify patients at higher risk of developing long COVID?

|           |           |          |                   |      |   |                                                                   |       |
|-----------|-----------|----------|-------------------|------|---|-------------------------------------------------------------------|-------|
| CCI score | 535274723 | 4091768  | Charlson - Cancer | TRUE | 1 | Burkitt's lymphoma of intrathoracic lymph nodes                   | FALSE |
| CCI score | 535274723 | 4092515  | Charlson - Cancer | TRUE | 1 | Malignant neoplasm, overlapping lesion of cervix uteri            | FALSE |
| CCI score | 535274723 | 4097560  | Charlson - Cancer | TRUE | 1 | Burkitt's lymphoma of intra-abdominal lymph nodes                 | FALSE |
| CCI score | 535274723 | 4110889  | Charlson - Cancer | TRUE | 1 | Malignant tumor of acoustic vestibular nerve                      | FALSE |
| CCI score | 535274723 | 4111917  | Charlson - Cancer | TRUE | 1 | Malignant mesothelioma of pleura                                  | FALSE |
| CCI score | 535274723 | 4133599  | Charlson - Cancer | TRUE | 1 | Chronic myelomonocytic leukemia                                   | FALSE |
| CCI score | 535274723 | 4139358  | Charlson - Cancer | TRUE | 1 | Erythroleukemia, FAB M6 in remission                              | FALSE |
| CCI score | 535274723 | 4153890  | Charlson - Cancer | TRUE | 1 | Malignant melanoma of trunk                                       | FALSE |
| CCI score | 535274723 | 4162115  | Charlson - Cancer | TRUE | 1 | Primary malignant neoplasm of adrenal cortex                      | FALSE |
| CCI score | 535274723 | 4162253  | Charlson - Cancer | TRUE | 1 | Primary malignant neoplasm of breast                              | FALSE |
| CCI score | 535274723 | 4162860  | Charlson - Cancer | TRUE | 1 | Primary malignant neoplasm of body of uterus                      | FALSE |
| CCI score | 535274723 | 4188545  | Charlson - Cancer | TRUE | 1 | Primary malignant neoplasm of breast lower outer quadrant         | FALSE |
| CCI score | 535274723 | 4247238  | Charlson - Cancer | TRUE | 1 | Primary malignant neoplasm of endometrium                         | FALSE |
| CCI score | 535274723 | 4288751  | Charlson - Cancer | TRUE | 1 | Heavy chain disease                                               | FALSE |
| CCI score | 535274723 | 4301668  | Charlson - Cancer | TRUE | 1 | Primary cutaneous follicular center B-cell lymphoma               | FALSE |
| CCI score | 535274723 | 36684817 | Charlson - Cancer | TRUE | 1 | Primary malignant neoplasm of axillary tail of left female breast | FALSE |
| CCI score | 535274723 | 37396742 | Charlson - Cancer | TRUE | 1 | Aggressive systemic mastocytosis                                  | FALSE |
| CCI score | 535274723 | 40482859 | Charlson - Cancer | TRUE | 1 | Malignant carcinoid tumor                                         | FALSE |
| CCI score | 535274723 | 40483761 | Charlson - Cancer | TRUE | 1 | Acute myeloid leukemia with myelodysplasia-related changes        | FALSE |
| CCI score | 535274723 | 40486171 | Charlson - Cancer | TRUE | 1 | Diffuse follicle center lymphoma                                  | FALSE |
| CCI score | 535274723 | 40488812 | Charlson - Cancer | TRUE | 1 | Sarcoma of dendritic cells (accessory cells)                      | FALSE |
| CCI score | 535274723 | 46271647 | Charlson - Cancer | TRUE | 1 | Malignant carcinoid tumor of stomach                              | FALSE |
| CCI score | 535274723 | 26638    | Charlson - Cancer | TRUE | 1 | Primary malignant neoplasm of esophagus                           | FALSE |
| CCI score | 535274723 | 132565   | Charlson - Cancer | TRUE | 1 | Primary malignant neoplasm of vermilion border of lower lip       | FALSE |
| CCI score | 535274723 | 132575   | Charlson - Cancer | TRUE | 1 | Myeloid sarcoma in remission                                      | FALSE |
| CCI score | 535274723 | 134295   | Charlson - Cancer | TRUE | 1 | Primary malignant neoplasm of spinal meninges                     | FALSE |
| CCI score | 535274723 | 134597   | Charlson - Cancer | TRUE | 1 | Chronic leukemia in remission                                     | FALSE |
| CCI score | 535274723 | 135750   | Charlson - Cancer | TRUE | 1 | Primary malignant neoplasm of floor of mouth                      | FALSE |
| CCI score | 535274723 | 136917   | Charlson - Cancer | TRUE | 1 | Primary malignant neoplasm of skin of face                        | FALSE |
| CCI score | 535274723 | 138099   | Charlson - Cancer | TRUE | 1 | Erythroleukemia, FAB M6                                           | FALSE |

**White Paper:** Can longitudinal electronic health record data identify patients at higher risk of developing long COVID?

|           |           |         |                   |      |   |                                                                                          |       |
|-----------|-----------|---------|-------------------|------|---|------------------------------------------------------------------------------------------|-------|
| CCI score | 535274723 | 139750  | Charlson - Cancer | TRUE | 1 | Primary malignant neoplasm of skin                                                       | FALSE |
| CCI score | 535274723 | 192255  | Charlson - Cancer | TRUE | 1 | Primary malignant neoplasm of pylorus                                                    | FALSE |
| CCI score | 535274723 | 193719  | Charlson - Cancer | TRUE | 1 | Primary malignant neoplasm of spermatic cord                                             | FALSE |
| CCI score | 535274723 | 196051  | Charlson - Cancer | TRUE | 1 | Overlapping malignant neoplasm of female genital organs                                  | FALSE |
| CCI score | 535274723 | 197799  | Charlson - Cancer | TRUE | 1 | Primary malignant neoplasm of the peritoneum                                             | FALSE |
| CCI score | 535274723 | 198100  | Charlson - Cancer | TRUE | 1 | Carcinoid tumor of small intestine                                                       | FALSE |
| CCI score | 535274723 | 198104  | Charlson - Cancer | TRUE | 1 | Primary malignant neoplasm of adrenal gland                                              | FALSE |
| CCI score | 535274723 | 199754  | Charlson - Cancer | TRUE | 1 | Primary malignant neoplasm of pancreas                                                   | FALSE |
| CCI score | 535274723 | 255192  | Charlson - Cancer | TRUE | 1 | Primary malignant neoplasm of commissure of lip                                          | FALSE |
| CCI score | 535274723 | 261514  | Charlson - Cancer | TRUE | 1 | Primary malignant neoplasm of supraglottis                                               | FALSE |
| CCI score | 535274723 | 321234  | Charlson - Cancer | TRUE | 1 | Overlapping malignant neoplasm of heart, mediastinum and pleura                          | FALSE |
| CCI score | 535274723 | 321522  | Charlson - Cancer | TRUE | 1 | Hodgkin's disease, lymphocytic-histiocytic predominance of lymph nodes of multiple sites | FALSE |
| CCI score | 535274723 | 373151  | Charlson - Cancer | TRUE | 1 | Primary malignant neoplasm of conjunctiva (primary)                                      | FALSE |
| CCI score | 535274723 | 432257  | Charlson - Cancer | TRUE | 1 | Primary malignant neoplasm of transverse colon                                           | FALSE |
| CCI score | 535274723 | 432267  | Charlson - Cancer | TRUE | 1 | Hodgkin's disease, lymphocytic depletion of extranodal AND/OR solid organ site           | FALSE |
| CCI score | 535274723 | 433149  | Charlson - Cancer | TRUE | 1 | Primary malignant neoplasm of cerebellum                                                 | FALSE |
| CCI score | 535274723 | 434300  | Charlson - Cancer | TRUE | 1 | Neuroendocrine tumor                                                                     | FALSE |
| CCI score | 535274723 | 436652  | Charlson - Cancer | TRUE | 1 | Hodgkin's disease of lymph nodes of inguinal region AND/OR lower limb                    | FALSE |
| CCI score | 535274723 | 437220  | Charlson - Cancer | TRUE | 1 | Primary malignant neoplasm of ventral surface of tongue                                  | FALSE |
| CCI score | 535274723 | 440339  | Charlson - Cancer | TRUE | 1 | Primary malignant neoplasm of prepuce                                                    | FALSE |
| CCI score | 535274723 | 440658  | Charlson - Cancer | TRUE | 1 | Primary malignant neoplasm of skin of upper limb                                         | FALSE |
| CCI score | 535274723 | 441233  | Charlson - Cancer | TRUE | 1 | Primary malignant neoplasm of frontal lobe                                               | FALSE |
| CCI score | 535274723 | 442161  | Charlson - Cancer | TRUE | 1 | Hodgkin's disease, mixed cellularity of lymph nodes of head, face AND/OR neck            | FALSE |
| CCI score | 535274723 | 442168  | Charlson - Cancer | TRUE | 1 | Mycosis fungoides of spleen                                                              | FALSE |
| CCI score | 535274723 | 4002356 | Charlson - Cancer | TRUE | 1 | Diffuse non-Hodgkin's lymphoma, small cell (clinical)                                    | FALSE |
| CCI score | 535274723 | 4032870 | Charlson - Cancer | TRUE | 1 | Malignant mesothelioma of pericardium                                                    | FALSE |
| CCI score | 535274723 | 4033891 | Charlson - Cancer | TRUE | 1 | Mesothelioma (malignant, clinical disorder)                                              | FALSE |
| CCI score | 535274723 | 4041798 | Charlson - Cancer | TRUE | 1 | Hodgkin's disease, lymphocytic depletion (clinical)                                      | FALSE |
| CCI score | 535274723 | 4091469 | Charlson - Cancer | TRUE | 1 | Malignant neoplasm of nipple and areola of male breast                                   | FALSE |



**White Paper:** Can longitudinal electronic health record data identify patients at higher risk of developing long COVID?

|           |           |          |                   |      |   |                                                                             |       |
|-----------|-----------|----------|-------------------|------|---|-----------------------------------------------------------------------------|-------|
| CCI score | 535274723 | 4091621  | Charlson - Cancer | TRUE | 1 | Malignant neoplasm of peripheral nerve of abdomen                           | FALSE |
| CCI score | 535274723 | 4092235  | Charlson - Cancer | TRUE | 1 | Malignant neoplasm of connective and soft tissue of upper limb and shoulder | FALSE |
| CCI score | 535274723 | 4094262  | Charlson - Cancer | TRUE | 1 | Malignant neoplasm of peripheral nerve of thorax                            | FALSE |
| CCI score | 535274723 | 4095892  | Charlson - Cancer | TRUE | 1 | Malignant neoplasm of peripheral nerves of head, face and neck              | FALSE |
| CCI score | 535274723 | 4137687  | Charlson - Cancer | TRUE | 1 | Acute promyelocytic leukemia, FAB M3, in remission                          | FALSE |
| CCI score | 535274723 | 4158563  | Charlson - Cancer | TRUE | 1 | Primary malignant neoplasm of breast upper inner quadrant                   | FALSE |
| CCI score | 535274723 | 4179720  | Charlson - Cancer | TRUE | 1 | Primary malignant neoplasm of gastrointestinal tract                        | FALSE |
| CCI score | 535274723 | 4247822  | Charlson - Cancer | TRUE | 1 | Primary malignant neoplasm of central nervous system                        | FALSE |
| CCI score | 535274723 | 4308811  | Charlson - Cancer | TRUE | 1 | Neoplasm of soft tissue                                                     | FALSE |
| CCI score | 535274723 | 40481907 | Charlson - Cancer | TRUE | 1 | Carcinoid tumor                                                             | FALSE |
| CCI score | 535274723 | 40488896 | Charlson - Cancer | TRUE | 1 | Anaplastic large cell lymphoma, ALK negative                                | FALSE |
| CCI score | 535274723 | 42709931 | Charlson - Cancer | TRUE | 1 | Primary malignant neoplasm of dome of urinary bladder                       | FALSE |
| CCI score | 535274723 | 45765770 | Charlson - Cancer | TRUE | 1 | Follicular non-Hodgkin's lymphoma diffuse follicle center sub-type grade 1  | FALSE |
| CCI score | 359043664 | 321319   | Charlson - CHF    | TRUE | 1 | Cardiomyopathy                                                              | FALSE |
| CCI score | 359043664 | 4004279  | Charlson - CHF    | TRUE | 1 | High output heart failure                                                   | FALSE |
| CCI score | 359043664 | 4242669  | Charlson - CHF    | TRUE | 1 | Biventricular congestive heart failure                                      | FALSE |
| CCI score | 359043664 | 40480603 | Charlson - CHF    | TRUE | 1 | Acute systolic heart failure                                                | FALSE |
| CCI score | 359043664 | 318773   | Charlson - CHF    | TRUE | 1 | Dilated cardiomyopathy secondary to alcohol                                 | FALSE |
| CCI score | 359043664 | 439696   | Charlson - CHF    | TRUE | 1 | Hypertensive heart and renal disease with (congestive) heart failure        | FALSE |
| CCI score | 359043664 | 443580   | Charlson - CHF    | TRUE | 1 | Systolic heart failure                                                      | FALSE |
| CCI score | 359043664 | 443587   | Charlson - CHF    | TRUE | 1 | Diastolic heart failure                                                     | FALSE |
| CCI score | 359043664 | 444101   | Charlson - CHF    | TRUE | 1 | Hypertensive heart failure                                                  | FALSE |
| CCI score | 359043664 | 4014159  | Charlson - CHF    | TRUE | 1 | Chronic right-sided heart failure                                           | FALSE |
| CCI score | 359043664 | 4172864  | Charlson - CHF    | TRUE | 1 | Neonatal cardiac failure                                                    | FALSE |
| CCI score | 359043664 | 4163710  | Charlson - CHF    | TRUE | 1 | Dilated cardiomyopathy                                                      | FALSE |
| CCI score | 359043664 | 4229440  | Charlson - CHF    | TRUE | 1 | Chronic congestive heart failure                                            | FALSE |
| CCI score | 359043664 | 4233424  | Charlson - CHF    | TRUE | 1 | Acute right-sided heart failure                                             | FALSE |
| CCI score | 359043664 | 44782718 | Charlson - CHF    | TRUE | 1 | Acute combined systolic and diastolic heart failure                         | FALSE |
| CCI score | 359043664 | 44782733 | Charlson - CHF    | TRUE | 1 | Acute on chronic combined systolic and diastolic heart failure              | FALSE |
| CCI score | 359043664 | 320746   | Charlson - CHF    | TRUE | 1 | Cardiomyopathy associated with another disorder                             | FALSE |

**White Paper:** Can longitudinal electronic health record data identify patients at higher risk of developing long COVID?

|           |           |          |                     |      |   |                                                                      |       |
|-----------|-----------|----------|---------------------|------|---|----------------------------------------------------------------------|-------|
| CCI score | 359043664 | 439846   | Charlson - CHF      | TRUE | 1 | Left heart failure                                                   | FALSE |
| CCI score | 359043664 | 4190773  | Charlson - CHF      | TRUE | 1 | Restrictive cardiomyopathy                                           | FALSE |
| CCI score | 359043664 | 4273632  | Charlson - CHF      | TRUE | 1 | Right ventricular failure                                            | FALSE |
| CCI score | 359043664 | 40479576 | Charlson - CHF      | TRUE | 1 | Chronic diastolic heart failure                                      | FALSE |
| CCI score | 359043664 | 40481043 | Charlson - CHF      | TRUE | 1 | Acute on chronic diastolic heart failure                             | FALSE |
| CCI score | 359043664 | 316139   | Charlson - CHF      | TRUE | 1 | Heart failure                                                        | FALSE |
| CCI score | 359043664 | 40480602 | Charlson - CHF      | TRUE | 1 | Acute on chronic systolic heart failure                              | FALSE |
| CCI score | 359043664 | 44782719 | Charlson - CHF      | TRUE | 1 | Chronic combined systolic and diastolic heart failure                | FALSE |
| CCI score | 359043664 | 319835   | Charlson - CHF      | TRUE | 1 | Congestive heart failure                                             | FALSE |
| CCI score | 359043664 | 4110961  | Charlson - CHF      | TRUE | 1 | Generalized ischemic myocardial dysfunction                          | FALSE |
| CCI score | 359043664 | 4195785  | Charlson - CHF      | TRUE | 1 | Right heart failure secondary to left heart failure                  | FALSE |
| CCI score | 359043664 | 37309625 | Charlson - CHF      | TRUE | 1 | Acute on chronic right-sided congestive heart failure                | FALSE |
| CCI score | 359043664 | 40479192 | Charlson - CHF      | TRUE | 1 | Chronic systolic heart failure                                       | FALSE |
| CCI score | 359043664 | 40481042 | Charlson - CHF      | TRUE | 1 | Acute diastolic heart failure                                        | FALSE |
| CCI score | 359043664 | 40482727 | Charlson - CHF      | TRUE | 1 | Combined systolic and diastolic dysfunction                          | FALSE |
| CCI score | 78746470  | 4182210  | Charlson - Dementia | TRUE | 1 | Dementia                                                             | FALSE |
| CCI score | 78746470  | 37109056 | Charlson - Dementia | TRUE | 1 | Vascular dementia without behavioral disturbance                     | FALSE |
| CCI score | 78746470  | 43530666 | Charlson - Dementia | TRUE | 1 | Dementia with behavioral disturbance                                 | FALSE |
| CCI score | 78746470  | 373179   | Charlson - Dementia | TRUE | 1 | Senile degeneration of brain                                         | FALSE |
| CCI score | 78746470  | 378419   | Charlson - Dementia | TRUE | 1 | Alzheimer's disease                                                  | FALSE |
| CCI score | 78746470  | 4220313  | Charlson - Dementia | TRUE | 1 | Primary degenerative dementia of the Alzheimer type, senile onset    | FALSE |
| CCI score | 78746470  | 37018688 | Charlson - Dementia | TRUE | 1 | Vascular dementia with behavioral disturbance                        | FALSE |
| CCI score | 78746470  | 4218017  | Charlson - Dementia | TRUE | 1 | Primary degenerative dementia of the Alzheimer type, presenile onset | FALSE |
| CCI score | 78746470  | 374888   | Charlson - Dementia | TRUE | 1 | Dementia associated with another disease                             | FALSE |
| CCI score | 78746470  | 443605   | Charlson - Dementia | TRUE | 1 | Vascular dementia                                                    | FALSE |
| CCI score | 719585646 | 439770   | Charlson - DM       | TRUE | 1 | Ketoacidosis due to type 1 diabetes mellitus                         | FALSE |
| CCI score | 719585646 | 443412   | Charlson - DM       | TRUE | 1 | Type 1 diabetes mellitus without complication                        | FALSE |
| CCI score | 719585646 | 4214376  | Charlson - DM       | TRUE | 1 | Hyperglycemia                                                        | FALSE |
| CCI score | 719585646 | 4224254  | Charlson - DM       | TRUE | 1 | Ketoacidotic coma due to type 1 diabetes mellitus                    | FALSE |
| CCI score | 719585646 | 4228443  | Charlson - DM       | TRUE | 1 | Ketoacidotic coma due to type 2 diabetes mellitus                    | FALSE |

**White Paper:** Can longitudinal electronic health record data identify patients at higher risk of developing long COVID?

|           |           |          |               |      |   |                                                       |       |
|-----------|-----------|----------|---------------|------|---|-------------------------------------------------------|-------|
| CCI score | 719585646 | 442793   | Charlson - DM | TRUE | 1 | Complication due to diabetes mellitus                 | FALSE |
| CCI score | 719585646 | 4008576  | Charlson - DM | TRUE | 1 | Diabetes mellitus without complication                | FALSE |
| CCI score | 719585646 | 4152858  | Charlson - DM | TRUE | 1 | Type 1 diabetes mellitus with arthropathy             | FALSE |
| CCI score | 719585646 | 43531616 | Charlson - DM | TRUE | 1 | Dermopathy due to type 2 diabetes mellitus            | FALSE |
| CCI score | 719585646 | 45757363 | Charlson - DM | TRUE | 1 | Hypoglycemia due to type 2 diabetes mellitus          | FALSE |
| CCI score | 719585646 | 45769832 | Charlson - DM | TRUE | 1 | Dermopathy due to type 1 diabetes mellitus            | FALSE |
| CCI score | 719585646 | 4029423  | Charlson - DM | TRUE | 1 | Hypoglycemia due to diabetes mellitus                 | FALSE |
| CCI score | 719585646 | 4032787  | Charlson - DM | TRUE | 1 | Hyperosmolarity                                       | FALSE |
| CCI score | 719585646 | 4042502  | Charlson - DM | TRUE | 1 | Disease of mouth                                      | FALSE |
| CCI score | 719585646 | 4099214  | Charlson - DM | TRUE | 1 | Type 1 diabetes mellitus with ulcer                   | FALSE |
| CCI score | 719585646 | 4228112  | Charlson - DM | TRUE | 1 | Hypoglycemic coma due to type 1 diabetes mellitus     | FALSE |
| CCI score | 719585646 | 201530   | Charlson - DM | TRUE | 1 | Hyperosmolar coma due to type 2 diabetes mellitus     | FALSE |
| CCI score | 719585646 | 201820   | Charlson - DM | TRUE | 1 | Diabetes mellitus                                     | FALSE |
| CCI score | 719585646 | 4099651  | Charlson - DM | TRUE | 1 | Type 2 diabetes mellitus with ulcer                   | FALSE |
| CCI score | 719585646 | 4159742  | Charlson - DM | TRUE | 1 | Diabetic foot ulcer                                   | FALSE |
| CCI score | 719585646 | 4226798  | Charlson - DM | TRUE | 1 | Hypoglycemic coma due to diabetes mellitus            | FALSE |
| CCI score | 719585646 | 37016349 | Charlson - DM | TRUE | 1 | Hyperglycemia due to type 2 diabetes mellitus         | FALSE |
| CCI score | 719585646 | 45770902 | Charlson - DM | TRUE | 1 | Ulcer of lower limb due to type 1 diabetes mellitus   | FALSE |
| CCI score | 719585646 | 46270483 | Charlson - DM | TRUE | 1 | Arthropathy due to metabolic disorder                 | FALSE |
| CCI score | 719585646 | 134398   | Charlson - DM | TRUE | 1 | Periodontal disease                                   | FALSE |
| CCI score | 719585646 | 443734   | Charlson - DM | TRUE | 1 | Ketoacidosis due to type 2 diabetes mellitus          | FALSE |
| CCI score | 719585646 | 4033942  | Charlson - DM | TRUE | 1 | Diabetic dermopathy                                   | FALSE |
| CCI score | 719585646 | 4095288  | Charlson - DM | TRUE | 1 | Ketoacidotic coma due to diabetes mellitus            | FALSE |
| CCI score | 719585646 | 4198296  | Charlson - DM | TRUE | 1 | Type 2 diabetes mellitus with neuropathic arthropathy | FALSE |
| CCI score | 719585646 | 43530690 | Charlson - DM | TRUE | 1 | Foot ulcer due to type 2 diabetes mellitus            | FALSE |
| CCI score | 719585646 | 4009303  | Charlson - DM | TRUE | 1 | Diabetic ketoacidosis without coma                    | FALSE |
| CCI score | 719585646 | 4114427  | Charlson - DM | TRUE | 1 | Neuropathic arthropathy due to diabetes mellitus      | FALSE |
| CCI score | 719585646 | 4193704  | Charlson - DM | TRUE | 1 | Type 2 diabetes mellitus without complication         | FALSE |
| CCI score | 719585646 | 4227657  | Charlson - DM | TRUE | 1 | Skin ulcer due to diabetes mellitus                   | FALSE |
| CCI score | 719585646 | 37016348 | Charlson - DM | TRUE | 1 | Hyperglycemia due to type 1 diabetes mellitus         | FALSE |

**White Paper:** Can longitudinal electronic health record data identify patients at higher risk of developing long COVID?

|           |           |          |                 |      |   |                                                                       |       |
|-----------|-----------|----------|-----------------|------|---|-----------------------------------------------------------------------|-------|
| CCI score | 719585646 | 45769830 | Charlson - DM   | TRUE | 1 | Neuropathic arthropathy due to type 1 diabetes mellitus               | FALSE |
| CCI score | 719585646 | 201254   | Charlson - DM   | TRUE | 1 | Type 1 diabetes mellitus                                              | FALSE |
| CCI score | 719585646 | 201826   | Charlson - DM   | TRUE | 1 | Type 2 diabetes mellitus                                              | FALSE |
| CCI score | 719585646 | 443727   | Charlson - DM   | TRUE | 1 | Diabetic ketoacidosis                                                 | FALSE |
| CCI score | 719585646 | 4196141  | Charlson - DM   | TRUE | 1 | Arthropathy due to type 2 diabetes mellitus                           | FALSE |
| CCI score | 719585646 | 4226238  | Charlson - DM   | TRUE | 1 | Hyperosmolar coma due to diabetes mellitus                            | FALSE |
| CCI score | 719585646 | 36714116 | Charlson - DM   | TRUE | 1 | Hypoglycemic coma due to type 2 diabetes mellitus                     | FALSE |
| CCI score | 719585646 | 45769876 | Charlson - DM   | TRUE | 1 | Hypoglycemia due to type 1 diabetes mellitus                          | FALSE |
| CCI score | 403438288 | 192279   | Charlson - DMcx | TRUE | 1 | Disorder of kidney due to diabetes mellitus                           | FALSE |
| CCI score | 403438288 | 200687   | Charlson - DMcx | TRUE | 1 | Renal disorder due to type 1 diabetes mellitus                        | FALSE |
| CCI score | 403438288 | 318712   | Charlson - DMcx | TRUE | 1 | Peripheral circulatory disorder due to type 1 diabetes mellitus       | FALSE |
| CCI score | 403438288 | 378743   | Charlson - DMcx | TRUE | 1 | Mild nonproliferative retinopathy due to diabetes mellitus            | FALSE |
| CCI score | 403438288 | 4143857  | Charlson - DMcx | TRUE | 1 | Lumbosacral radiculoplexus neuropathy due to type 1 diabetes mellitus | FALSE |
| CCI score | 403438288 | 4174977  | Charlson - DMcx | TRUE | 1 | Retinopathy due to diabetes mellitus                                  | FALSE |
| CCI score | 403438288 | 4222876  | Charlson - DMcx | TRUE | 1 | Gangrene due to type 2 diabetes mellitus                              | FALSE |
| CCI score | 403438288 | 4225656  | Charlson - DMcx | TRUE | 1 | Cataract due to diabetes mellitus type 1                              | FALSE |
| CCI score | 403438288 | 37016180 | Charlson - DMcx | TRUE | 1 | Moderate nonproliferative retinopathy due to type 1 diabetes mellitus | FALSE |
| CCI score | 403438288 | 321822   | Charlson - DMcx | TRUE | 1 | Peripheral vascular disorder due to diabetes mellitus                 | FALSE |
| CCI score | 403438288 | 376065   | Charlson - DMcx | TRUE | 1 | Disorder of nervous system due to type 2 diabetes mellitus            | FALSE |
| CCI score | 403438288 | 380096   | Charlson - DMcx | TRUE | 1 | Proliferative retinopathy due to diabetes mellitus                    | FALSE |
| CCI score | 403438288 | 380097   | Charlson - DMcx | TRUE | 1 | Macular edema due to diabetes mellitus                                | FALSE |
| CCI score | 403438288 | 4140466  | Charlson - DMcx | TRUE | 1 | Lumbosacral radiculoplexus neuropathy due to type 2 diabetes mellitus | FALSE |
| CCI score | 403438288 | 4175440  | Charlson - DMcx | TRUE | 1 | Autonomic neuropathy due to diabetes mellitus                         | FALSE |
| CCI score | 403438288 | 4191611  | Charlson - DMcx | TRUE | 1 | Lumbosacral radiculoplexus neuropathy due to diabetes mellitus        | FALSE |
| CCI score | 403438288 | 4223303  | Charlson - DMcx | TRUE | 1 | Gangrene due to type 1 diabetes mellitus                              | FALSE |
| CCI score | 403438288 | 4225055  | Charlson - DMcx | TRUE | 1 | Mononeuropathy due to type 1 diabetes mellitus                        | FALSE |
| CCI score | 403438288 | 4227210  | Charlson - DMcx | TRUE | 1 | Retinopathy due to type 1 diabetes mellitus                           | FALSE |
| CCI score | 403438288 | 43530685 | Charlson - DMcx | TRUE | 1 | Proliferative retinopathy due to type 2 diabetes mellitus             | FALSE |
| CCI score | 403438288 | 43531578 | Charlson - DMcx | TRUE | 1 | Chronic kidney disease due to type 2 diabetes mellitus                | FALSE |
| CCI score | 403438288 | 376114   | Charlson - DMcx | TRUE | 1 | Severe nonproliferative retinopathy due to diabetes mellitus          | FALSE |

**White Paper:** Can longitudinal electronic health record data identify patients at higher risk of developing long COVID?

|           |           |          |                 |      |   |                                                                                                        |       |
|-----------|-----------|----------|-----------------|------|---|--------------------------------------------------------------------------------------------------------|-------|
| CCI score | 403438288 | 443731   | Charlson - DMcx | TRUE | 1 | Renal disorder due to type 2 diabetes mellitus                                                         | FALSE |
| CCI score | 403438288 | 4044391  | Charlson - DMcx | TRUE | 1 | Neuropathy due to diabetes mellitus                                                                    | FALSE |
| CCI score | 403438288 | 43530656 | Charlson - DMcx | TRUE | 1 | Nonproliferative retinopathy due to type 2 diabetes mellitus                                           | FALSE |
| CCI score | 403438288 | 377552   | Charlson - DMcx | TRUE | 1 | Moderate nonproliferative retinopathy due to diabetes mellitus                                         | FALSE |
| CCI score | 403438288 | 443729   | Charlson - DMcx | TRUE | 1 | Peripheral circulatory disorder due to type 2 diabetes mellitus                                        | FALSE |
| CCI score | 403438288 | 443730   | Charlson - DMcx | TRUE | 1 | Disorder of nervous system due to diabetes mellitus                                                    | FALSE |
| CCI score | 403438288 | 4131908  | Charlson - DMcx | TRUE | 1 | Peripheral angiopathy due to diabetes mellitus                                                         | FALSE |
| CCI score | 403438288 | 4338896  | Charlson - DMcx | TRUE | 1 | Traction retinal detachment involving macula                                                           | FALSE |
| CCI score | 403438288 | 45763584 | Charlson - DMcx | TRUE | 1 | Proliferative retinopathy due to type 1 diabetes mellitus                                              | FALSE |
| CCI score | 403438288 | 376979   | Charlson - DMcx | TRUE | 1 | Cataract due to diabetes mellitus                                                                      | FALSE |
| CCI score | 403438288 | 443733   | Charlson - DMcx | TRUE | 1 | Disorder of eye due to type 2 diabetes mellitus                                                        | FALSE |
| CCI score | 403438288 | 443767   | Charlson - DMcx | TRUE | 1 | Disorder of eye due to diabetes mellitus                                                               | FALSE |
| CCI score | 403438288 | 4338901  | Charlson - DMcx | TRUE | 1 | Traction detachment of retina due to diabetes mellitus                                                 | FALSE |
| CCI score | 403438288 | 45757435 | Charlson - DMcx | TRUE | 1 | Mild nonproliferative retinopathy due to type 2 diabetes mellitus                                      | FALSE |
| CCI score | 403438288 | 45763583 | Charlson - DMcx | TRUE | 1 | Nonproliferative diabetic retinopathy due to type 1 diabetes mellitus                                  | FALSE |
| CCI score | 403438288 | 45769873 | Charlson - DMcx | TRUE | 1 | Traction detachment of retina due to type 1 diabetes mellitus                                          | FALSE |
| CCI score | 403438288 | 45773064 | Charlson - DMcx | TRUE | 1 | Traction detachment of retina due to type 2 diabetes mellitus                                          | FALSE |
| CCI score | 403438288 | 376112   | Charlson - DMcx | TRUE | 1 | Polyneuropathy due to diabetes mellitus                                                                | FALSE |
| CCI score | 403438288 | 4048028  | Charlson - DMcx | TRUE | 1 | Diabetic mononeuropathy                                                                                | FALSE |
| CCI score | 403438288 | 4222415  | Charlson - DMcx | TRUE | 1 | Mononeuropathy due to type 2 diabetes mellitus                                                         | FALSE |
| CCI score | 403438288 | 4290822  | Charlson - DMcx | TRUE | 1 | Severe nonproliferative retinopathy with clinically significant macular edema due to diabetes mellitus | FALSE |
| CCI score | 403438288 | 37016179 | Charlson - DMcx | TRUE | 1 | Mild nonproliferative retinopathy due to type 1 diabetes mellitus                                      | FALSE |
| CCI score | 403438288 | 37016768 | Charlson - DMcx | TRUE | 1 | Autonomic neuropathy due to type 2 diabetes mellitus                                                   | FALSE |
| CCI score | 403438288 | 37017431 | Charlson - DMcx | TRUE | 1 | Polyneuropathy due to type 1 diabetes mellitus                                                         | FALSE |
| CCI score | 403438288 | 42538169 | Charlson - DMcx | TRUE | 1 | Disorder of eye due to type 1 diabetes mellitus                                                        | FALSE |
| CCI score | 403438288 | 45770881 | Charlson - DMcx | TRUE | 1 | Moderate nonproliferative retinopathy due to type 2 diabetes mellitus                                  | FALSE |
| CCI score | 403438288 | 377821   | Charlson - DMcx | TRUE | 1 | Disorder of nervous system due to type 1 diabetes mellitus                                             | FALSE |
| CCI score | 403438288 | 4221495  | Charlson - DMcx | TRUE | 1 | Cataract due to diabetes mellitus type 2                                                               | FALSE |
| CCI score | 403438288 | 4226354  | Charlson - DMcx | TRUE | 1 | Gangrene due to diabetes mellitus                                                                      | FALSE |

**White Paper:** Can longitudinal electronic health record data identify patients at higher risk of developing long COVID?

|           |           |          |                      |      |   |                                                                                       |       |
|-----------|-----------|----------|----------------------|------|---|---------------------------------------------------------------------------------------|-------|
| CCI score | 403438288 | 4266637  | Charlson - DMcx      | TRUE | 1 | Severe nonproliferative retinopathy without macular edema due to diabetes mellitus    | FALSE |
| CCI score | 403438288 | 4338897  | Charlson - DMcx      | TRUE | 1 | Combined traction and rhegmatogenous retinal detachment                               | FALSE |
| CCI score | 403438288 | 37016767 | Charlson - DMcx      | TRUE | 1 | Autonomic neuropathy due to type 1 diabetes mellitus                                  | FALSE |
| CCI score | 403438288 | 37017432 | Charlson - DMcx      | TRUE | 1 | Polyneuropathy due to type 2 diabetes mellitus                                        | FALSE |
| CCI score | 403438288 | 45770830 | Charlson - DMcx      | TRUE | 1 | Macular edema and retinopathy due to type 2 diabetes mellitus                         | FALSE |
| CCI score | 494981955 | 4046123  | Charlson - LiverMild | TRUE | 1 | Secondary biliary cirrhosis                                                           | FALSE |
| CCI score | 494981955 | 4055225  | Charlson - LiverMild | TRUE | 1 | Toxic liver disease with chronic lobular hepatitis                                    | FALSE |
| CCI score | 494981955 | 4059299  | Charlson - LiverMild | TRUE | 1 | Toxic liver disease with chronic active hepatitis                                     | FALSE |
| CCI score | 494981955 | 192675   | Charlson - LiverMild | TRUE | 1 | Biliary cirrhosis                                                                     | FALSE |
| CCI score | 494981955 | 194984   | Charlson - LiverMild | TRUE | 1 | Disease of liver                                                                      | FALSE |
| CCI score | 494981955 | 196463   | Charlson - LiverMild | TRUE | 1 | Alcoholic cirrhosis                                                                   | FALSE |
| CCI score | 494981955 | 4026125  | Charlson - LiverMild | TRUE | 1 | Chronic active hepatitis                                                              | FALSE |
| CCI score | 494981955 | 4340383  | Charlson - LiverMild | TRUE | 1 | Alcoholic hepatitis                                                                   | FALSE |
| CCI score | 494981955 | 42537742 | Charlson - LiverMild | TRUE | 1 | Transplanted liver present                                                            | FALSE |
| CCI score | 494981955 | 192240   | Charlson - LiverMild | TRUE | 1 | Chronic viral hepatitis B with hepatitis D                                            | FALSE |
| CCI score | 494981955 | 194417   | Charlson - LiverMild | TRUE | 1 | Hepatic infarction                                                                    | FALSE |
| CCI score | 494981955 | 4238978  | Charlson - LiverMild | TRUE | 1 | Chronic lobular hepatitis                                                             | FALSE |
| CCI score | 494981955 | 46269816 | Charlson - LiverMild | TRUE | 1 | Ascites due to alcoholic cirrhosis                                                    | FALSE |
| CCI score | 494981955 | 46269835 | Charlson - LiverMild | TRUE | 1 | Hepatic ascites due to chronic alcoholic hepatitis                                    | FALSE |
| CCI score | 494981955 | 193256   | Charlson - LiverMild | TRUE | 1 | Alcoholic fatty liver                                                                 | FALSE |
| CCI score | 494981955 | 4059298  | Charlson - LiverMild | TRUE | 1 | Toxic liver disease with chronic persistent hepatitis                                 | FALSE |
| CCI score | 494981955 | 4340385  | Charlson - LiverMild | TRUE | 1 | Alcoholic fibrosis and sclerosis of liver                                             | FALSE |
| CCI score | 494981955 | 46273476 | Charlson - LiverMild | TRUE | 1 | Hepatic ascites co-occurrent with chronic active hepatitis due to toxic liver disease | FALSE |
| CCI score | 494981955 | 198964   | Charlson - LiverMild | TRUE | 1 | Chronic hepatitis C                                                                   | FALSE |
| CCI score | 494981955 | 4012113  | Charlson - LiverMild | TRUE | 1 | Chronic viral hepatitis                                                               | FALSE |
| CCI score | 494981955 | 4135822  | Charlson - LiverMild | TRUE | 1 | Primary biliary cholangitis                                                           | FALSE |
| CCI score | 494981955 | 4267417  | Charlson - LiverMild | TRUE | 1 | Hepatic fibrosis                                                                      | FALSE |
| CCI score | 494981955 | 201612   | Charlson - LiverMild | TRUE | 1 | Alcoholic liver damage                                                                | FALSE |
| CCI score | 494981955 | 4058695  | Charlson - LiverMild | TRUE | 1 | Toxic liver disease with fibrosis and cirrhosis of liver                              | FALSE |

**White Paper:** Can longitudinal electronic health record data identify patients at higher risk of developing long COVID?

|           |           |          |                        |      |   |                                                   |       |
|-----------|-----------|----------|------------------------|------|---|---------------------------------------------------|-------|
| CCI score | 494981955 | 4058696  | Charlson - LiverMild   | TRUE | 1 | Central hemorrhagic necrosis of liver             | FALSE |
| CCI score | 494981955 | 4064161  | Charlson - LiverMild   | TRUE | 1 | Cirrhosis of liver                                | FALSE |
| CCI score | 494981955 | 4240725  | Charlson - LiverMild   | TRUE | 1 | Peliosis hepatis                                  | FALSE |
| CCI score | 494981955 | 4340394  | Charlson - LiverMild   | TRUE | 1 | Hepatic sclerosis                                 | FALSE |
| CCI score | 494981955 | 4340948  | Charlson - LiverMild   | TRUE | 1 | Hepatic fibrosis with hepatic sclerosis           | FALSE |
| CCI score | 494981955 | 199867   | Charlson - LiverMild   | TRUE | 1 | Chronic persistent hepatitis                      | FALSE |
| CCI score | 494981955 | 200763   | Charlson - LiverMild   | TRUE | 1 | Chronic hepatitis                                 | FALSE |
| CCI score | 494981955 | 439674   | Charlson - LiverMild   | TRUE | 1 | Chronic viral hepatitis B without delta-agent     | FALSE |
| CCI score | 494981955 | 4059290  | Charlson - LiverMild   | TRUE | 1 | Steatosis of liver                                | FALSE |
| CCI score | 494981955 | 4159144  | Charlson - LiverMild   | TRUE | 1 | Hepatopulmonary syndrome                          | FALSE |
| CCI score | 248333963 | 377604   | Charlson - LiverSevere | TRUE | 1 | Hepatic coma                                      | FALSE |
| CCI score | 248333963 | 4277276  | Charlson - LiverSevere | TRUE | 1 | Veno-occlusive disease of the liver               | FALSE |
| CCI score | 248333963 | 4340386  | Charlson - LiverSevere | TRUE | 1 | Alcoholic hepatic failure                         | FALSE |
| CCI score | 248333963 | 192680   | Charlson - LiverSevere | TRUE | 1 | Portal hypertension                               | FALSE |
| CCI score | 248333963 | 4340390  | Charlson - LiverSevere | TRUE | 1 | Chronic hepatic failure                           | FALSE |
| CCI score | 248333963 | 46269836 | Charlson - LiverSevere | TRUE | 1 | Hepatic coma due to chronic hepatic failure       | FALSE |
| CCI score | 248333963 | 196455   | Charlson - LiverSevere | TRUE | 1 | Hepatorenal syndrome                              | FALSE |
| CCI score | 248333963 | 22340    | Charlson - LiverSevere | TRUE | 1 | Esophageal varices without bleeding               | FALSE |
| CCI score | 248333963 | 24966    | Charlson - LiverSevere | TRUE | 1 | Esophageal varices                                | FALSE |
| CCI score | 248333963 | 4026136  | Charlson - LiverSevere | TRUE | 1 | Toxic liver disease with hepatic necrosis         | FALSE |
| CCI score | 248333963 | 4245975  | Charlson - LiverSevere | TRUE | 1 | Hepatic failure                                   | FALSE |
| CCI score | 248333963 | 46269818 | Charlson - LiverSevere | TRUE | 1 | Hepatic coma due to alcoholic liver failure       | FALSE |
| CCI score | 248333963 | 28779    | Charlson - LiverSevere | TRUE | 1 | Bleeding esophageal varices                       | FALSE |
| CCI score | 248333963 | 4237824  | Charlson - LiverSevere | TRUE | 1 | Gastric varices                                   | FALSE |
| CCI score | 378462283 | 72266    | Charlson - Mets        | TRUE | 1 | Secondary malignant neoplasm of pleura            | FALSE |
| CCI score | 378462283 | 136354   | Charlson - Mets        | TRUE | 1 | Secondary malignant neoplasm of skin              | FALSE |
| CCI score | 378462283 | 193144   | Charlson - Mets        | TRUE | 1 | Secondary malignant neoplasm of adrenal gland     | FALSE |
| CCI score | 378462283 | 198371   | Charlson - Mets        | TRUE | 1 | Secondary malignant neoplasm of small intestine   | FALSE |
| CCI score | 378462283 | 253717   | Charlson - Mets        | TRUE | 1 | Secondary malignant neoplasm of respiratory tract | FALSE |
| CCI score | 378462283 | 432851   | Charlson - Mets        | TRUE | 1 | Secondary malignant neoplastic disease            | FALSE |

**White Paper:** Can longitudinal electronic health record data identify patients at higher risk of developing long COVID?

|           |           |          |                 |      |   |                                                                   |       |
|-----------|-----------|----------|-----------------|------|---|-------------------------------------------------------------------|-------|
| CCI score | 378462283 | 442182   | Charlson - Mets | TRUE | 1 | Secondary malignant neoplasm of lymph nodes of lower limb         | FALSE |
| CCI score | 378462283 | 4246450  | Charlson - Mets | TRUE | 1 | Secondary malignant neoplasm of bone marrow                       | FALSE |
| CCI score | 378462283 | 4281027  | Charlson - Mets | TRUE | 1 | Secondary malignant neoplasm of left ovary                        | FALSE |
| CCI score | 378462283 | 4314071  | Charlson - Mets | TRUE | 1 | Secondary malignant neoplasm of trunk                             | FALSE |
| CCI score | 378462283 | 44806773 | Charlson - Mets | TRUE | 1 | Secondary malignant neoplasm of liver and intrahepatic bile duct  | FALSE |
| CCI score | 378462283 | 439751   | Charlson - Mets | TRUE | 1 | Secondary malignant neoplasm of intrathoracic lymph nodes         | FALSE |
| CCI score | 378462283 | 4147162  | Charlson - Mets | TRUE | 1 | Secondary malignant neoplasm of respiratory and digestive systems | FALSE |
| CCI score | 378462283 | 4281030  | Charlson - Mets | TRUE | 1 | Secondary malignant neoplasm of right ovary                       | FALSE |
| CCI score | 378462283 | 46273652 | Charlson - Mets | TRUE | 1 | Secondary malignant neoplasm of left lung                         | FALSE |
| CCI score | 378462283 | 78987    | Charlson - Mets | TRUE | 1 | Secondary malignant neoplasm of urinary system                    | FALSE |
| CCI score | 378462283 | 318096   | Charlson - Mets | TRUE | 1 | Secondary malignant neoplasm of lymph node                        | FALSE |
| CCI score | 378462283 | 443252   | Charlson - Mets | TRUE | 1 | Post-transplant neoplasia                                         | FALSE |
| CCI score | 378462283 | 4158910  | Charlson - Mets | TRUE | 1 | Secondary malignant neoplasm of unknown site                      | FALSE |
| CCI score | 378462283 | 4312802  | Charlson - Mets | TRUE | 1 | Secondary malignant neoplasm of bladder                           | FALSE |
| CCI score | 378462283 | 78097    | Charlson - Mets | TRUE | 1 | Secondary malignant neoplasm of bone                              | FALSE |
| CCI score | 378462283 | 196925   | Charlson - Mets | TRUE | 1 | Secondary malignant neoplasm of retroperitoneum and peritoneum    | FALSE |
| CCI score | 378462283 | 434875   | Charlson - Mets | TRUE | 1 | Secondary malignant neoplasm of mediastinum                       | FALSE |
| CCI score | 378462283 | 4160276  | Charlson - Mets | TRUE | 1 | Malignant neoplasm of genital structure                           | FALSE |
| CCI score | 378462283 | 4247962  | Charlson - Mets | TRUE | 1 | Secondary malignant neoplasm of gastrointestinal tract            | FALSE |
| CCI score | 378462283 | 4312290  | Charlson - Mets | TRUE | 1 | Secondary malignant neoplasm of cerebral meninges                 | FALSE |
| CCI score | 378462283 | 192568   | Charlson - Mets | TRUE | 1 | Secondary malignant neoplasm of intra-abdominal lymph nodes       | FALSE |
| CCI score | 378462283 | 199752   | Charlson - Mets | TRUE | 1 | Secondary malignant neoplasm of ovary                             | FALSE |
| CCI score | 378462283 | 4246451  | Charlson - Mets | TRUE | 1 | Secondary malignant neoplasm of brain                             | FALSE |
| CCI score | 378462283 | 4315806  | Charlson - Mets | TRUE | 1 | Secondary malignant neoplasm of retroperitoneum                   | FALSE |
| CCI score | 378462283 | 200348   | Charlson - Mets | TRUE | 1 | Secondary malignant neoplasm of large intestine                   | FALSE |
| CCI score | 378462283 | 200959   | Charlson - Mets | TRUE | 1 | Secondary malignant neoplasm of intrapelvic lymph nodes           | FALSE |
| CCI score | 378462283 | 373425   | Charlson - Mets | TRUE | 1 | Secondary malignant neoplasm of nervous system                    | FALSE |
| CCI score | 378462283 | 434298   | Charlson - Mets | TRUE | 1 | Secondary malignant neoplasm of lymph nodes of upper limb         | FALSE |
| CCI score | 378462283 | 438701   | Charlson - Mets | TRUE | 1 | Disseminated malignancy of unknown primary                        | FALSE |
| CCI score | 378462283 | 46270513 | Charlson - Mets | TRUE | 1 | Secondary malignant neoplasm of right lung                        | FALSE |



**White Paper:** Can longitudinal electronic health record data identify patients at higher risk of developing long COVID?

|           |           |          |                      |      |   |                                                                                                     |       |
|-----------|-----------|----------|----------------------|------|---|-----------------------------------------------------------------------------------------------------|-------|
| CCI score | 378462283 | 140960   | Charlson - Mets      | TRUE | 1 | Secondary malignant neoplasm of female breast                                                       | FALSE |
| CCI score | 378462283 | 254591   | Charlson - Mets      | TRUE | 1 | Secondary malignant neoplasm of lung                                                                | FALSE |
| CCI score | 378462283 | 320342   | Charlson - Mets      | TRUE | 1 | Secondary malignant neoplasm of lymph nodes of multiple sites                                       | FALSE |
| CCI score | 378462283 | 443392   | Charlson - Mets      | TRUE | 1 | Malignant neoplastic disease                                                                        | FALSE |
| CCI score | 259495957 | 4108218  | Charlson - MI        | TRUE | 1 | Subsequent myocardial infarction of inferior wall                                                   | FALSE |
| CCI score | 259495957 | 43020460 | Charlson - MI        | TRUE | 1 | Acute ST segment elevation myocardial infarction involving left anterior descending coronary artery | FALSE |
| CCI score | 259495957 | 314666   | Charlson - MI        | TRUE | 1 | Old myocardial infarction                                                                           | FALSE |
| CCI score | 259495957 | 4108217  | Charlson - MI        | TRUE | 1 | Subsequent myocardial infarction                                                                    | FALSE |
| CCI score | 259495957 | 45766114 | Charlson - MI        | TRUE | 1 | Subsequent ST segment elevation myocardial infarction                                               | FALSE |
| CCI score | 259495957 | 46270162 | Charlson - MI        | TRUE | 1 | Acute ST segment elevation myocardial infarction due to left coronary artery occlusion              | FALSE |
| CCI score | 259495957 | 312327   | Charlson - MI        | TRUE | 1 | Acute myocardial infarction                                                                         | FALSE |
| CCI score | 259495957 | 45766075 | Charlson - MI        | TRUE | 1 | Acute anterior ST segment elevation myocardial infarction                                           | FALSE |
| CCI score | 259495957 | 45766116 | Charlson - MI        | TRUE | 1 | Acute ST segment elevation myocardial infarction of inferior wall                                   | FALSE |
| CCI score | 259495957 | 45766241 | Charlson - MI        | TRUE | 1 | Subsequent non-ST segment elevation myocardial infarction                                           | FALSE |
| CCI score | 259495957 | 4108677  | Charlson - MI        | TRUE | 1 | Subsequent myocardial infarction of anterior wall                                                   | FALSE |
| CCI score | 259495957 | 4329847  | Charlson - MI        | TRUE | 1 | Myocardial infarction                                                                               | FALSE |
| CCI score | 259495957 | 4296653  | Charlson - MI        | TRUE | 1 | Acute ST segment elevation myocardial infarction                                                    | FALSE |
| CCI score | 259495957 | 46270163 | Charlson - MI        | TRUE | 1 | Acute ST segment elevation myocardial infarction due to right coronary artery occlusion             | FALSE |
| CCI score | 259495957 | 4270024  | Charlson - MI        | TRUE | 1 | Acute non-ST segment elevation myocardial infarction                                                | FALSE |
| CCI score | 489555336 | 372613   | Charlson - Paralysis | TRUE | 1 | Flaccid hemiplegia                                                                                  | FALSE |
| CCI score | 489555336 | 375528   | Charlson - Paralysis | TRUE | 1 | Spastic hemiplegia                                                                                  | FALSE |
| CCI score | 489555336 | 4102342  | Charlson - Paralysis | TRUE | 1 | Cauda equina syndrome                                                                               | FALSE |
| CCI score | 489555336 | 40480435 | Charlson - Paralysis | TRUE | 1 | Spastic hemiplegia of nondominant side                                                              | FALSE |
| CCI score | 489555336 | 43530719 | Charlson - Paralysis | TRUE | 1 | Incomplete paraplegia                                                                               | FALSE |
| CCI score | 489555336 | 195240   | Charlson - Paralysis | TRUE | 1 | Monoplegia of lower limb                                                                            | FALSE |
| CCI score | 489555336 | 40480416 | Charlson - Paralysis | TRUE | 1 | Complete tetraplegia due to lesion at C1-C4 level                                                   | FALSE |
| CCI score | 489555336 | 43530718 | Charlson - Paralysis | TRUE | 1 | Complete paraplegia                                                                                 | FALSE |
| CCI score | 489555336 | 372880   | Charlson - Paralysis | TRUE | 1 | Diplegia of upper limbs                                                                             | FALSE |

**White Paper:** Can longitudinal electronic health record data identify patients at higher risk of developing long COVID?

|           |           |          |                      |      |   |                                                                        |       |
|-----------|-----------|----------|----------------------|------|---|------------------------------------------------------------------------|-------|
| CCI score | 489555336 | 374377   | Charlson - Paralysis | TRUE | 1 | Paralytic syndrome                                                     | FALSE |
| CCI score | 489555336 | 380393   | Charlson - Paralysis | TRUE | 1 | Monoplegia of upper limb affecting non-dominant side                   | FALSE |
| CCI score | 489555336 | 381548   | Charlson - Paralysis | TRUE | 1 | Monoplegia                                                             | FALSE |
| CCI score | 489555336 | 4144328  | Charlson - Paralysis | TRUE | 1 | Monoplegia of lower limb affecting dominant side                       | FALSE |
| CCI score | 489555336 | 37019108 | Charlson - Paralysis | TRUE | 1 | Human T-cell lymphotropic virus 1-associated myelopathy                | FALSE |
| CCI score | 489555336 | 40480429 | Charlson - Paralysis | TRUE | 1 | Hemiplegia of nondominant side                                         | FALSE |
| CCI score | 489555336 | 40480514 | Charlson - Paralysis | TRUE | 1 | Incomplete tetraplegia due to lesion at C5-C7 level                    | FALSE |
| CCI score | 489555336 | 40481345 | Charlson - Paralysis | TRUE | 1 | Monoplegia of upper limb of dominant side                              | FALSE |
| CCI score | 489555336 | 40481757 | Charlson - Paralysis | TRUE | 1 | Flaccid hemiplegia of dominant side                                    | FALSE |
| CCI score | 489555336 | 44806793 | Charlson - Paralysis | TRUE | 1 | Spastic hemiplegic cerebral palsy                                      | FALSE |
| CCI score | 489555336 | 379012   | Charlson - Paralysis | TRUE | 1 | Monoplegia of upper limb                                               | FALSE |
| CCI score | 489555336 | 40480944 | Charlson - Paralysis | TRUE | 1 | Spastic hemiplegia of dominant side                                    | FALSE |
| CCI score | 489555336 | 40481376 | Charlson - Paralysis | TRUE | 1 | Complete tetraplegia due to lesion at C5-C7 level                      | FALSE |
| CCI score | 489555336 | 40481820 | Charlson - Paralysis | TRUE | 1 | Flaccid hemiplegia of nondominant side                                 | FALSE |
| CCI score | 489555336 | 40482237 | Charlson - Paralysis | TRUE | 1 | Hemiplegia of dominant side                                            | FALSE |
| CCI score | 489555336 | 192606   | Charlson - Paralysis | TRUE | 1 | Paraplegia                                                             | FALSE |
| CCI score | 489555336 | 374914   | Charlson - Paralysis | TRUE | 1 | Tetraplegia                                                            | FALSE |
| CCI score | 489555336 | 4141654  | Charlson - Paralysis | TRUE | 1 | Monoplegia of lower limb affecting non-dominant side                   | FALSE |
| CCI score | 489555336 | 132617   | Charlson - Paralysis | TRUE | 1 | Diplegic cerebral palsy                                                | FALSE |
| CCI score | 489555336 | 374022   | Charlson - Paralysis | TRUE | 1 | Hemiplegia                                                             | FALSE |
| CCI score | 489555336 | 43531639 | Charlson - Paralysis | TRUE | 1 | Paralytic syndrome on one side of the body                             | FALSE |
| CCI score | 489555336 | 192901   | Charlson - Paralysis | TRUE | 1 | Hereditary spastic paraplegia                                          | FALSE |
| CCI score | 489555336 | 40480066 | Charlson - Paralysis | TRUE | 1 | Incomplete tetraplegia due to spinal cord lesion at C1-C4 level        | FALSE |
| CCI score | 510748896 | 4222896  | Charlson - PUD       | TRUE | 1 | Chronic duodenal ulcer without hemorrhage AND without perforation      | FALSE |
| CCI score | 510748896 | 4231580  | Charlson - PUD       | TRUE | 1 | Acute gastric ulcer with hemorrhage                                    | FALSE |
| CCI score | 510748896 | 433515   | Charlson - PUD       | TRUE | 1 | Chronic gastrojejunal ulcer with hemorrhage                            | FALSE |
| CCI score | 510748896 | 4173408  | Charlson - PUD       | TRUE | 1 | Chronic duodenal ulcer with perforation                                | FALSE |
| CCI score | 510748896 | 4177387  | Charlson - PUD       | TRUE | 1 | Chronic gastrojejunal ulcer without hemorrhage AND without perforation | FALSE |
| CCI score | 510748896 | 4198381  | Charlson - PUD       | TRUE | 1 | Ulcer of duodenum                                                      | FALSE |
| CCI score | 510748896 | 4265479  | Charlson - PUD       | TRUE | 1 | Acute duodenal ulcer with perforation                                  | FALSE |

**White Paper:** Can longitudinal electronic health record data identify patients at higher risk of developing long COVID?

|           |           |         |                |      |   |                                                                      |       |
|-----------|-----------|---------|----------------|------|---|----------------------------------------------------------------------|-------|
| CCI score | 510748896 | 4289830 | Charlson - PUD | TRUE | 1 | Chronic duodenal ulcer with hemorrhage AND perforation               | FALSE |
| CCI score | 510748896 | 4336230 | Charlson - PUD | TRUE | 1 | Acute duodenal ulcer with hemorrhage AND perforation                 | FALSE |
| CCI score | 510748896 | 4101870 | Charlson - PUD | TRUE | 1 | Chronic gastrojejunal ulcer with perforation                         | FALSE |
| CCI score | 510748896 | 4146517 | Charlson - PUD | TRUE | 1 | Chronic peptic ulcer with perforation                                | FALSE |
| CCI score | 510748896 | 4147683 | Charlson - PUD | TRUE | 1 | Acute gastrojejunal ulcer without hemorrhage AND without perforation | FALSE |
| CCI score | 510748896 | 4174044 | Charlson - PUD | TRUE | 1 | Chronic peptic ulcer with hemorrhage                                 | FALSE |
| CCI score | 510748896 | 4247008 | Charlson - PUD | TRUE | 1 | Chronic peptic ulcer with hemorrhage AND perforation                 | FALSE |
| CCI score | 510748896 | 4248429 | Charlson - PUD | TRUE | 1 | Gastric ulcer without hemorrhage AND without perforation             | FALSE |
| CCI score | 510748896 | 4265600 | Charlson - PUD | TRUE | 1 | Gastric ulcer                                                        | FALSE |
| CCI score | 510748896 | 4296611 | Charlson - PUD | TRUE | 1 | Chronic gastric ulcer without hemorrhage AND without perforation     | FALSE |
| CCI score | 510748896 | 4027729 | Charlson - PUD | TRUE | 1 | Acute duodenal ulcer with hemorrhage                                 | FALSE |
| CCI score | 510748896 | 4057953 | Charlson - PUD | TRUE | 1 | Acute gastric ulcer with perforation                                 | FALSE |
| CCI score | 510748896 | 4059178 | Charlson - PUD | TRUE | 1 | Gastrojejunal ulcer                                                  | FALSE |
| CCI score | 510748896 | 4164920 | Charlson - PUD | TRUE | 1 | Chronic gastrojejunal ulcer with hemorrhage and perforation          | FALSE |
| CCI score | 510748896 | 4274491 | Charlson - PUD | TRUE | 1 | Acute gastrojejunal ulcer with hemorrhage                            | FALSE |
| CCI score | 510748896 | 4294973 | Charlson - PUD | TRUE | 1 | Chronic gastric ulcer with hemorrhage and with perforation           | FALSE |
| CCI score | 510748896 | 4027663 | Charlson - PUD | TRUE | 1 | Peptic ulcer                                                         | FALSE |
| CCI score | 510748896 | 4046500 | Charlson - PUD | TRUE | 1 | Acute peptic ulcer with hemorrhage                                   | FALSE |
| CCI score | 510748896 | 4150681 | Charlson - PUD | TRUE | 1 | Chronic gastric ulcer with perforation                               | FALSE |
| CCI score | 510748896 | 4169592 | Charlson - PUD | TRUE | 1 | Acute gastric ulcer with hemorrhage and perforation                  | FALSE |
| CCI score | 510748896 | 4204555 | Charlson - PUD | TRUE | 1 | Chronic peptic ulcer without hemorrhage AND without perforation      | FALSE |
| CCI score | 510748896 | 4280942 | Charlson - PUD | TRUE | 1 | Acute gastrojejunal ulcer with perforation                           | FALSE |
| CCI score | 510748896 | 4006994 | Charlson - PUD | TRUE | 1 | Acute peptic ulcer with hemorrhage and perforation                   | FALSE |
| CCI score | 510748896 | 4101104 | Charlson - PUD | TRUE | 1 | Gastrojejunal ulcer without hemorrhage AND without perforation       | FALSE |
| CCI score | 510748896 | 4194543 | Charlson - PUD | TRUE | 1 | Acute peptic ulcer with perforation                                  | FALSE |
| CCI score | 510748896 | 4195231 | Charlson - PUD | TRUE | 1 | Acute gastric ulcer without hemorrhage AND without perforation       | FALSE |
| CCI score | 510748896 | 4211001 | Charlson - PUD | TRUE | 1 | Chronic gastric ulcer with hemorrhage                                | FALSE |
| CCI score | 510748896 | 4217947 | Charlson - PUD | TRUE | 1 | Acute gastrojejunal ulcer with hemorrhage and perforation            | FALSE |
| CCI score | 510748896 | 4138962 | Charlson - PUD | TRUE | 1 | Acute duodenal ulcer without hemorrhage AND without perforation      | FALSE |
| CCI score | 510748896 | 4163865 | Charlson - PUD | TRUE | 1 | Acute peptic ulcer without hemorrhage AND without perforation        | FALSE |

**White Paper:** Can longitudinal electronic health record data identify patients at higher risk of developing long COVID?

|           |           |          |                      |      |   |                                                          |       |
|-----------|-----------|----------|----------------------|------|---|----------------------------------------------------------|-------|
| CCI score | 510748896 | 4232181  | Charlson - PUD       | TRUE | 1 | Chronic duodenal ulcer with hemorrhage                   | FALSE |
| CCI score | 514953976 | 435298   | Charlson - Pulmonary | TRUE | 1 | Farmers' lung                                            | FALSE |
| CCI score | 514953976 | 4112814  | Charlson - Pulmonary | TRUE | 1 | Chronic drug-induced interstitial lung disorders         | FALSE |
| CCI score | 514953976 | 4145356  | Charlson - Pulmonary | TRUE | 1 | Severe persistent asthma                                 | FALSE |
| CCI score | 514953976 | 4167085  | Charlson - Pulmonary | TRUE | 1 | Pulmonary heart disease                                  | FALSE |
| CCI score | 514953976 | 4249010  | Charlson - Pulmonary | TRUE | 1 | Pneumoconiosis due to talc                               | FALSE |
| CCI score | 514953976 | 45769351 | Charlson - Pulmonary | TRUE | 1 | Acute severe exacerbation of moderate persistent asthma  | FALSE |
| CCI score | 514953976 | 255841   | Charlson - Pulmonary | TRUE | 1 | Chronic bronchitis                                       | FALSE |
| CCI score | 514953976 | 261889   | Charlson - Pulmonary | TRUE | 1 | Simple chronic bronchitis                                | FALSE |
| CCI score | 514953976 | 320136   | Charlson - Pulmonary | TRUE | 1 | Disorder of respiratory system                           | FALSE |
| CCI score | 514953976 | 434975   | Charlson - Pulmonary | TRUE | 1 | Malt-workers' lung                                       | FALSE |
| CCI score | 514953976 | 439853   | Charlson - Pulmonary | TRUE | 1 | Bird-fanciers' lung                                      | FALSE |
| CCI score | 514953976 | 442125   | Charlson - Pulmonary | TRUE | 1 | Pneumoconiosis due to silica                             | FALSE |
| CCI score | 514953976 | 4066407  | Charlson - Pulmonary | TRUE | 1 | Graphite fibrosis of lung                                | FALSE |
| CCI score | 514953976 | 4112673  | Charlson - Pulmonary | TRUE | 1 | Air-conditioner and humidifier lung                      | FALSE |
| CCI score | 514953976 | 4142738  | Charlson - Pulmonary | TRUE | 1 | Moderate persistent asthma                               | FALSE |
| CCI score | 514953976 | 4143828  | Charlson - Pulmonary | TRUE | 1 | Mild persistent asthma                                   | FALSE |
| CCI score | 514953976 | 4302900  | Charlson - Pulmonary | TRUE | 1 | Cannabinosis                                             | FALSE |
| CCI score | 514953976 | 45769438 | Charlson - Pulmonary | TRUE | 1 | Acute severe exacerbation of asthma                      | FALSE |
| CCI score | 514953976 | 252348   | Charlson - Pulmonary | TRUE | 1 | Chronic pulmonary radiation disease                      | FALSE |
| CCI score | 514953976 | 256146   | Charlson - Pulmonary | TRUE | 1 | Pneumoconiosis due to silicate                           | FALSE |
| CCI score | 514953976 | 313236   | Charlson - Pulmonary | TRUE | 1 | Cough variant asthma                                     | FALSE |
| CCI score | 514953976 | 316452   | Charlson - Pulmonary | TRUE | 1 | Chronic respiratory condition due to fumes AND/OR vapors | FALSE |
| CCI score | 514953976 | 4032314  | Charlson - Pulmonary | TRUE | 1 | Bauxite fibrosis of lung                                 | FALSE |
| CCI score | 514953976 | 4286497  | Charlson - Pulmonary | TRUE | 1 | Centriacinar emphysema                                   | FALSE |
| CCI score | 514953976 | 4311814  | Charlson - Pulmonary | TRUE | 1 | Byssinosis                                               | FALSE |
| CCI score | 514953976 | 40493243 | Charlson - Pulmonary | TRUE | 1 | Eisenmenger's syndrome                                   | FALSE |
| CCI score | 514953976 | 45768908 | Charlson - Pulmonary | TRUE | 1 | Exercise induced bronchospasm                            | FALSE |
| CCI score | 514953976 | 45768963 | Charlson - Pulmonary | TRUE | 1 | Uncomplicated mild persistent asthma                     | FALSE |
| CCI score | 514953976 | 45768965 | Charlson - Pulmonary | TRUE | 1 | Uncomplicated severe persistent asthma                   | FALSE |

**White Paper:** Can longitudinal electronic health record data identify patients at higher risk of developing long COVID?

|           |           |          |                      |      |   |                                                                              |       |
|-----------|-----------|----------|----------------------|------|---|------------------------------------------------------------------------------|-------|
| CCI score | 514953976 | 45771045 | Charlson - Pulmonary | TRUE | 1 | Acute exacerbation of asthma                                                 | FALSE |
| CCI score | 514953976 | 46273487 | Charlson - Pulmonary | TRUE | 1 | Acute exacerbation of moderate persistent asthma                             | FALSE |
| CCI score | 514953976 | 254389   | Charlson - Pulmonary | TRUE | 1 | Pneumoconiosis due to inorganic dust                                         | FALSE |
| CCI score | 514953976 | 256449   | Charlson - Pulmonary | TRUE | 1 | Bronchiectasis                                                               | FALSE |
| CCI score | 514953976 | 256450   | Charlson - Pulmonary | TRUE | 1 | Asbestosis                                                                   | FALSE |
| CCI score | 514953976 | 257004   | Charlson - Pulmonary | TRUE | 1 | Acute exacerbation of chronic obstructive airways disease                    | FALSE |
| CCI score | 514953976 | 438175   | Charlson - Pulmonary | TRUE | 1 | Maple-bark strippers' lung                                                   | FALSE |
| CCI score | 514953976 | 4112676  | Charlson - Pulmonary | TRUE | 1 | Pneumoconiosis associated with tuberculosis                                  | FALSE |
| CCI score | 514953976 | 4138760  | Charlson - Pulmonary | TRUE | 1 | Exacerbation of intermittent asthma                                          | FALSE |
| CCI score | 514953976 | 4163244  | Charlson - Pulmonary | TRUE | 1 | Unilateral emphysema                                                         | FALSE |
| CCI score | 514953976 | 4177944  | Charlson - Pulmonary | TRUE | 1 | Panacinar emphysema                                                          | FALSE |
| CCI score | 514953976 | 4236624  | Charlson - Pulmonary | TRUE | 1 | Aluminosis of lung                                                           | FALSE |
| CCI score | 514953976 | 44782732 | Charlson - Pulmonary | TRUE | 1 | Chronic pulmonary embolism                                                   | FALSE |
| CCI score | 514953976 | 45769350 | Charlson - Pulmonary | TRUE | 1 | Acute severe exacerbation of severe persistent asthma                        | FALSE |
| CCI score | 514953976 | 256451   | Charlson - Pulmonary | TRUE | 1 | Bronchitis                                                                   | FALSE |
| CCI score | 514953976 | 261325   | Charlson - Pulmonary | TRUE | 1 | Pulmonary emphysema                                                          | FALSE |
| CCI score | 514953976 | 443890   | Charlson - Pulmonary | TRUE | 1 | Suberosis                                                                    | FALSE |
| CCI score | 514953976 | 4110056  | Charlson - Pulmonary | TRUE | 1 | Chronic obstructive pulmonary disease with acute lower respiratory infection | FALSE |
| CCI score | 514953976 | 4112826  | Charlson - Pulmonary | TRUE | 1 | Mixed simple and mucopurulent chronic bronchitis                             | FALSE |
| CCI score | 514953976 | 4146581  | Charlson - Pulmonary | TRUE | 1 | Mild intermittent asthma                                                     | FALSE |
| CCI score | 514953976 | 4266525  | Charlson - Pulmonary | TRUE | 1 | Pulmonary siderosis                                                          | FALSE |
| CCI score | 514953976 | 45768964 | Charlson - Pulmonary | TRUE | 1 | Uncomplicated moderate persistent asthma                                     | FALSE |
| CCI score | 514953976 | 45769352 | Charlson - Pulmonary | TRUE | 1 | Acute severe exacerbation of mild persistent asthma                          | FALSE |
| CCI score | 514953976 | 255573   | Charlson - Pulmonary | TRUE | 1 | Chronic obstructive lung disease                                             | FALSE |
| CCI score | 514953976 | 317009   | Charlson - Pulmonary | TRUE | 1 | Asthma                                                                       | FALSE |
| CCI score | 514953976 | 433233   | Charlson - Pulmonary | TRUE | 1 | Mushroom workers' lung                                                       | FALSE |
| CCI score | 514953976 | 444084   | Charlson - Pulmonary | TRUE | 1 | Extrinsic allergic alveolitis                                                | FALSE |
| CCI score | 514953976 | 4027669  | Charlson - Pulmonary | TRUE | 1 | Flax-dressers' disease                                                       | FALSE |
| CCI score | 514953976 | 4195892  | Charlson - Pulmonary | TRUE | 1 | Chronic cor pulmonale                                                        | FALSE |
| CCI score | 514953976 | 4221139  | Charlson - Pulmonary | TRUE | 1 | Berylliosis                                                                  | FALSE |

**White Paper:** Can longitudinal electronic health record data identify patients at higher risk of developing long COVID?

|           |           |          |                      |      |   |                                                     |       |
|-----------|-----------|----------|----------------------|------|---|-----------------------------------------------------|-------|
| CCI score | 514953976 | 46270082 | Charlson - Pulmonary | TRUE | 1 | Acute exacerbation of mild persistent asthma        | FALSE |
| CCI score | 514953976 | 252946   | Charlson - Pulmonary | TRUE | 1 | Coal workers' pneumoconiosis                        | FALSE |
| CCI score | 514953976 | 257905   | Charlson - Pulmonary | TRUE | 1 | Mucopurulent chronic bronchitis                     | FALSE |
| CCI score | 514953976 | 259044   | Charlson - Pulmonary | TRUE | 1 | Pneumoconiosis                                      | FALSE |
| CCI score | 514953976 | 437588   | Charlson - Pulmonary | TRUE | 1 | Bagassosis                                          | FALSE |
| CCI score | 514953976 | 4196950  | Charlson - Pulmonary | TRUE | 1 | Stannosis                                           | FALSE |
| CCI score | 514953976 | 37116845 | Charlson - Pulmonary | TRUE | 1 | Acute severe refractory exacerbation of asthma      | FALSE |
| CCI score | 514953976 | 40483342 | Charlson - Pulmonary | TRUE | 1 | Acute exacerbation of bronchiectasis                | FALSE |
| CCI score | 514953976 | 45768910 | Charlson - Pulmonary | TRUE | 1 | Uncomplicated asthma                                | FALSE |
| CCI score | 376881697 | 199064   | Charlson - PVD       | TRUE | 1 | Chronic vascular insufficiency of intestine         | FALSE |
| CCI score | 376881697 | 312343   | Charlson - PVD       | TRUE | 1 | Ruptured aortic aneurysm                            | FALSE |
| CCI score | 376881697 | 317305   | Charlson - PVD       | TRUE | 1 | Stricture of artery                                 | FALSE |
| CCI score | 376881697 | 317585   | Charlson - PVD       | TRUE | 1 | Aortic aneurysm                                     | FALSE |
| CCI score | 376881697 | 441875   | Charlson - PVD       | TRUE | 1 | Thoracic aortic aneurysm which has ruptured         | FALSE |
| CCI score | 376881697 | 443358   | Charlson - PVD       | TRUE | 1 | Ulcer of heel                                       | FALSE |
| CCI score | 376881697 | 4177703  | Charlson - PVD       | TRUE | 1 | Ulcer                                               | FALSE |
| CCI score | 376881697 | 36717279 | Charlson - PVD       | TRUE | 1 | Gangrene of right lower limb due to atherosclerosis | FALSE |
| CCI score | 376881697 | 37110250 | Charlson - PVD       | TRUE | 1 | Atherosclerosis of artery of lower limb             | FALSE |
| CCI score | 376881697 | 40479625 | Charlson - PVD       | TRUE | 1 | Atherosclerosis of artery                           | FALSE |
| CCI score | 376881697 | 46271459 | Charlson - PVD       | TRUE | 1 | Atherosclerosis of bypass graft of lower limb       | FALSE |
| CCI score | 376881697 | 195834   | Charlson - PVD       | TRUE | 1 | Atherosclerosis of renal artery                     | FALSE |
| CCI score | 376881697 | 312939   | Charlson - PVD       | TRUE | 1 | Thromboangiitis obliterans                          | FALSE |
| CCI score | 376881697 | 433222   | Charlson - PVD       | TRUE | 1 | Thoracoabdominal aortic aneurysm, ruptured          | FALSE |
| CCI score | 376881697 | 4325344  | Charlson - PVD       | TRUE | 1 | Pain at rest due to peripheral vascular disease     | FALSE |
| CCI score | 376881697 | 36712963 | Charlson - PVD       | TRUE | 1 | Gangrene of left lower limb due to atherosclerosis  | FALSE |
| CCI score | 376881697 | 37016882 | Charlson - PVD       | TRUE | 1 | Dissection of thoracoabdominal aorta                | FALSE |
| CCI score | 376881697 | 44782819 | Charlson - PVD       | TRUE | 1 | Chronic occlusion of artery of extremity            | FALSE |
| CCI score | 376881697 | 138525   | Charlson - PVD       | TRUE | 1 | Pain in limb                                        | FALSE |
| CCI score | 376881697 | 197304   | Charlson - PVD       | TRUE | 1 | Ulcer of lower extremity                            | FALSE |
| CCI score | 376881697 | 315558   | Charlson - PVD       | TRUE | 1 | Atherosclerosis of arteries of the extremities      | FALSE |

**White Paper:** Can longitudinal electronic health record data identify patients at higher risk of developing long COVID?

|           |           |          |                |      |   |                                                                                            |       |
|-----------|-----------|----------|----------------|------|---|--------------------------------------------------------------------------------------------|-------|
| CCI score | 376881697 | 321052   | Charlson - PVD | TRUE | 1 | Peripheral vascular disease                                                                | FALSE |
| CCI score | 376881697 | 442287   | Charlson - PVD | TRUE | 1 | Rest pain                                                                                  | FALSE |
| CCI score | 376881697 | 4134603  | Charlson - PVD | TRUE | 1 | Vascular disorder of intestine                                                             | FALSE |
| CCI score | 376881697 | 4316222  | Charlson - PVD | TRUE | 1 | Venous intermittent claudication                                                           | FALSE |
| CCI score | 376881697 | 36717006 | Charlson - PVD | TRUE | 1 | Intermittent claudication of bilateral lower limbs co-occurrent and due to atherosclerosis | FALSE |
| CCI score | 376881697 | 36717286 | Charlson - PVD | TRUE | 1 | Intermittent claudication of left lower limb co-occurrent and due to atherosclerosis       | FALSE |
| CCI score | 376881697 | 37312529 | Charlson - PVD | TRUE | 1 | Intermittent claudication due to atherosclerosis of artery of limb                         | FALSE |
| CCI score | 376881697 | 37312531 | Charlson - PVD | TRUE | 1 | Gangrene of limb due to atherosclerosis of artery of limb                                  | FALSE |
| CCI score | 376881697 | 40484541 | Charlson - PVD | TRUE | 1 | Atherosclerosis of autologous vein bypass graft of limb                                    | FALSE |
| CCI score | 376881697 | 74719    | Charlson - PVD | TRUE | 1 | Ulcer of foot                                                                              | FALSE |
| CCI score | 376881697 | 134380   | Charlson - PVD | TRUE | 1 | Erythromelalgia                                                                            | FALSE |
| CCI score | 376881697 | 317577   | Charlson - PVD | TRUE | 1 | Arteriosclerotic gangrene                                                                  | FALSE |
| CCI score | 376881697 | 321882   | Charlson - PVD | TRUE | 1 | Generalized atherosclerosis                                                                | FALSE |
| CCI score | 376881697 | 443593   | Charlson - PVD | TRUE | 1 | Ulcer of thigh                                                                             | FALSE |
| CCI score | 376881697 | 4323360  | Charlson - PVD | TRUE | 1 | History of cardiovascular surgery                                                          | FALSE |
| CCI score | 376881697 | 35615028 | Charlson - PVD | TRUE | 1 | Bilateral atherosclerosis of lower limbs with gangrene                                     | FALSE |
| CCI score | 376881697 | 36712806 | Charlson - PVD | TRUE | 1 | Intermittent claudication of right lower limb co-occurrent and due to atherosclerosis      | FALSE |
| CCI score | 376881697 | 36712807 | Charlson - PVD | TRUE | 1 | Pain at rest of right lower limb co-occurrent and due to atherosclerosis                   | FALSE |
| CCI score | 376881697 | 37312520 | Charlson - PVD | TRUE | 1 | Ischemic foot ulcer due to atherosclerosis of artery of lower limb                         | FALSE |
| CCI score | 376881697 | 40484551 | Charlson - PVD | TRUE | 1 | Atherosclerosis of nonautologous biological bypass graft of limb                           | FALSE |
| CCI score | 376881697 | 195559   | Charlson - PVD | TRUE | 1 | Ruptured abdominal aortic aneurysm                                                         | FALSE |
| CCI score | 376881697 | 318443   | Charlson - PVD | TRUE | 1 | Arteriosclerotic vascular disease                                                          | FALSE |
| CCI score | 376881697 | 321314   | Charlson - PVD | TRUE | 1 | Abdominal aortic aneurysm without rupture                                                  | FALSE |
| CCI score | 376881697 | 436136   | Charlson - PVD | TRUE | 1 | Dissection of thoracic aorta                                                               | FALSE |
| CCI score | 376881697 | 4215685  | Charlson - PVD | TRUE | 1 | Past history of procedure                                                                  | FALSE |
| CCI score | 376881697 | 4256889  | Charlson - PVD | TRUE | 1 | Dissection of abdominal aorta                                                              | FALSE |
| CCI score | 376881697 | 37312519 | Charlson - PVD | TRUE | 1 | Ulcer of calf due to atherosclerosis of artery of lower limb                               | FALSE |
| CCI score | 376881697 | 40483538 | Charlson - PVD | TRUE | 1 | Atherosclerosis of bypass graft of limb                                                    | FALSE |

**White Paper:** Can longitudinal electronic health record data identify patients at higher risk of developing long COVID?

|           |           |          |                  |      |   |                                                                                           |       |
|-----------|-----------|----------|------------------|------|---|-------------------------------------------------------------------------------------------|-------|
| CCI score | 376881697 | 312934   | Charlson - PVD   | TRUE | 1 | Atherosclerosis of aorta                                                                  | FALSE |
| CCI score | 376881697 | 320739   | Charlson - PVD   | TRUE | 1 | Dissection of aorta                                                                       | FALSE |
| CCI score | 376881697 | 441051   | Charlson - PVD   | TRUE | 1 | Thoracic aortic aneurysm without rupture                                                  | FALSE |
| CCI score | 376881697 | 4171556  | Charlson - PVD   | TRUE | 1 | Ankle ulcer                                                                               | FALSE |
| CCI score | 376881697 | 4187240  | Charlson - PVD   | TRUE | 1 | Disorder of aorta                                                                         | FALSE |
| CCI score | 376881697 | 35611566 | Charlson - PVD   | TRUE | 1 | Bilateral lower limb atherosclerosis pain at rest co-occurrent and due to atherosclerosis | FALSE |
| CCI score | 376881697 | 37312524 | Charlson - PVD   | TRUE | 1 | Ulcer of ankle due to atherosclerosis of artery of lower limb                             | FALSE |
| CCI score | 376881697 | 436996   | Charlson - PVD   | TRUE | 1 | Thoracoabdominal aortic aneurysm                                                          | FALSE |
| CCI score | 376881697 | 442774   | Charlson - PVD   | TRUE | 1 | Intermittent claudication                                                                 | FALSE |
| CCI score | 376881697 | 36712805 | Charlson - PVD   | TRUE | 1 | Pain at rest of left lower limb co-occurrent and due to atherosclerosis                   | FALSE |
| CCI score | 220495690 | 4019967  | Charlson - Renal | TRUE | 1 | Dependence on renal dialysis                                                              | FALSE |
| CCI score | 220495690 | 42539502 | Charlson - Renal | TRUE | 1 | Transplanted kidney present                                                               | FALSE |
| CCI score | 220495690 | 44784621 | Charlson - Renal | TRUE | 1 | Hypertensive heart and chronic kidney disease                                             | FALSE |
| CCI score | 220495690 | 192359   | Charlson - Renal | TRUE | 1 | Renal failure syndrome                                                                    | FALSE |
| CCI score | 220495690 | 197921   | Charlson - Renal | TRUE | 1 | Renal osteodystrophy                                                                      | FALSE |
| CCI score | 220495690 | 443601   | Charlson - Renal | TRUE | 1 | Chronic kidney disease stage 2                                                            | FALSE |
| CCI score | 220495690 | 443614   | Charlson - Renal | TRUE | 1 | Chronic kidney disease stage 1                                                            | FALSE |
| CCI score | 220495690 | 4056480  | Charlson - Renal | TRUE | 1 | Chronic nephritic syndrome, diffuse crescentic glomerulonephritis                         | FALSE |
| CCI score | 220495690 | 4146996  | Charlson - Renal | TRUE | 1 | Mesangial proliferative glomerulonephritis                                                | FALSE |
| CCI score | 220495690 | 4298809  | Charlson - Renal | TRUE | 1 | Nephritic syndrome                                                                        | FALSE |
| CCI score | 220495690 | 252365   | Charlson - Renal | TRUE | 1 | Membranous glomerulonephritis                                                             | FALSE |
| CCI score | 220495690 | 443597   | Charlson - Renal | TRUE | 1 | Chronic kidney disease stage 3                                                            | FALSE |
| CCI score | 220495690 | 443611   | Charlson - Renal | TRUE | 1 | Chronic kidney disease stage 5                                                            | FALSE |
| CCI score | 220495690 | 4056462  | Charlson - Renal | TRUE | 1 | Chronic mesangial proliferative glomerulonephritis                                        | FALSE |
| CCI score | 220495690 | 4059463  | Charlson - Renal | TRUE | 1 | Chronic nephritic syndrome, diffuse endocapillary proliferative glomerulonephritis        | FALSE |
| CCI score | 220495690 | 4284491  | Charlson - Renal | TRUE | 1 | Diffuse endocapillary proliferative glomerulonephritis                                    | FALSE |
| CCI score | 220495690 | 443612   | Charlson - Renal | TRUE | 1 | Chronic kidney disease stage 4                                                            | FALSE |
| CCI score | 220495690 | 4055899  | Charlson - Renal | TRUE | 1 | Chronic nephritic syndrome, dense deposit disease                                         | FALSE |
| CCI score | 220495690 | 4059584  | Charlson - Renal | TRUE | 1 | Chronic nephritic syndrome, diffuse mesangiocapillary glomerulonephritis                  | FALSE |



**White Paper:** Can longitudinal electronic health record data identify patients at higher risk of developing long COVID?

|           |           |          |                      |      |   |                                                               |       |
|-----------|-----------|----------|----------------------|------|---|---------------------------------------------------------------|-------|
| CCI score | 220495690 | 4272486  | Charlson - Renal     | TRUE | 1 | Diffuse crescentic glomerulonephritis                         | FALSE |
| CCI score | 220495690 | 4301680  | Charlson - Renal     | TRUE | 1 | Dialysis care                                                 | FALSE |
| CCI score | 220495690 | 36717583 | Charlson - Renal     | TRUE | 1 | Dense deposit disease                                         | FALSE |
| CCI score | 220495690 | 443919   | Charlson - Renal     | TRUE | 1 | Hypertensive renal failure                                    | FALSE |
| CCI score | 220495690 | 4203722  | Charlson - Renal     | TRUE | 1 | Patient encounter procedure                                   | FALSE |
| CCI score | 220495690 | 46270347 | Charlson - Renal     | TRUE | 1 | Chronic nephritic syndrome with membranous glomerulonephritis | FALSE |
| CCI score | 220495690 | 193782   | Charlson - Renal     | TRUE | 1 | End-stage renal disease                                       | FALSE |
| CCI score | 220495690 | 433257   | Charlson - Renal     | TRUE | 1 | Mesangiocapillary glomerulonephritis                          | FALSE |
| CCI score | 220495690 | 46271022 | Charlson - Renal     | TRUE | 1 | Chronic kidney disease                                        | FALSE |
| CCI score | 765004404 | 134453   | Charlson - Rheumatic | TRUE | 1 | Bursitis                                                      | FALSE |
| CCI score | 765004404 | 255348   | Charlson - Rheumatic | TRUE | 1 | Polymyalgia rheumatica                                        | FALSE |
| CCI score | 765004404 | 4055369  | Charlson - Rheumatic | TRUE | 1 | Lung disease with polymyositis                                | FALSE |
| CCI score | 765004404 | 4055640  | Charlson - Rheumatic | TRUE | 1 | Lung disease with systemic lupus erythematosus                | FALSE |
| CCI score | 765004404 | 4081250  | Charlson - Rheumatic | TRUE | 1 | Dermatomyositis sine myositis                                 | FALSE |
| CCI score | 765004404 | 4271003  | Charlson - Rheumatic | TRUE | 1 | Rheumatoid vasculitis                                         | FALSE |
| CCI score | 765004404 | 4344166  | Charlson - Rheumatic | TRUE | 1 | Adult onset Still's disease                                   | FALSE |
| CCI score | 765004404 | 42534834 | Charlson - Rheumatic | TRUE | 1 | Rheumatoid arthritis of left hand                             | FALSE |
| CCI score | 765004404 | 42534837 | Charlson - Rheumatic | TRUE | 1 | Rheumatoid arthritis of right hip                             | FALSE |
| CCI score | 765004404 | 46270482 | Charlson - Rheumatic | TRUE | 1 | Polyneuropathy due to systemic sclerosis                      | FALSE |
| CCI score | 765004404 | 80800    | Charlson - Rheumatic | TRUE | 1 | Polymyositis                                                  | FALSE |
| CCI score | 765004404 | 4035611  | Charlson - Rheumatic | TRUE | 1 | Seropositive rheumatoid arthritis                             | FALSE |
| CCI score | 765004404 | 4079978  | Charlson - Rheumatic | TRUE | 1 | Overlap syndrome                                              | FALSE |
| CCI score | 765004404 | 4117687  | Charlson - Rheumatic | TRUE | 1 | Rheumatoid arthritis - ankle and/or foot                      | FALSE |
| CCI score | 765004404 | 4135937  | Charlson - Rheumatic | TRUE | 1 | CREST syndrome                                                | FALSE |
| CCI score | 765004404 | 4216972  | Charlson - Rheumatic | TRUE | 1 | Bursitis of hip                                               | FALSE |
| CCI score | 765004404 | 4285717  | Charlson - Rheumatic | TRUE | 1 | SLE glomerulonephritis syndrome                               | FALSE |
| CCI score | 765004404 | 37108590 | Charlson - Rheumatic | TRUE | 1 | Rheumatoid arthritis of left knee                             | FALSE |
| CCI score | 765004404 | 40485046 | Charlson - Rheumatic | TRUE | 1 | Progressive systemic sclerosis                                | FALSE |
| CCI score | 765004404 | 74125    | Charlson - Rheumatic | TRUE | 1 | Inflammatory polyarthropathy                                  | FALSE |
| CCI score | 765004404 | 81097    | Charlson - Rheumatic | TRUE | 1 | Felty's syndrome                                              | FALSE |

**White Paper:** Can longitudinal electronic health record data identify patients at higher risk of developing long COVID?

|           |           |          |                      |      |   |                                                                    |       |
|-----------|-----------|----------|----------------------|------|---|--------------------------------------------------------------------|-------|
| CCI score | 765004404 | 134442   | Charlson - Rheumatic | TRUE | 1 | Systemic sclerosis                                                 | FALSE |
| CCI score | 765004404 | 255304   | Charlson - Rheumatic | TRUE | 1 | Lung disease with systemic sclerosis                               | FALSE |
| CCI score | 765004404 | 4063581  | Charlson - Rheumatic | TRUE | 1 | Drug-induced systemic lupus erythematosus                          | FALSE |
| CCI score | 765004404 | 4107913  | Charlson - Rheumatic | TRUE | 1 | Myopathy due to rheumatoid arthritis                               | FALSE |
| CCI score | 765004404 | 4116150  | Charlson - Rheumatic | TRUE | 1 | Rheumatoid arthritis of hip                                        | FALSE |
| CCI score | 765004404 | 4117689  | Charlson - Rheumatic | TRUE | 1 | Bursitis of bursa of ankle and/or foot                             | FALSE |
| CCI score | 765004404 | 4184657  | Charlson - Rheumatic | TRUE | 1 | Bursitis of wrist                                                  | FALSE |
| CCI score | 765004404 | 4344158  | Charlson - Rheumatic | TRUE | 1 | Systemic lupus erythematosus with organ/system involvement         | FALSE |
| CCI score | 765004404 | 35609009 | Charlson - Rheumatic | TRUE | 1 | Rheumatoid arthritis of left shoulder                              | FALSE |
| CCI score | 765004404 | 37108591 | Charlson - Rheumatic | TRUE | 1 | Rheumatoid arthritis of right knee                                 | FALSE |
| CCI score | 765004404 | 37108607 | Charlson - Rheumatic | TRUE | 1 | Arthritis of right wrist                                           | FALSE |
| CCI score | 765004404 | 37395588 | Charlson - Rheumatic | TRUE | 1 | Juvenile dermatomyositis co-occurrent with respiratory involvement | FALSE |
| CCI score | 765004404 | 77630    | Charlson - Rheumatic | TRUE | 1 | Disorder of shoulder                                               | FALSE |
| CCI score | 765004404 | 4118008  | Charlson - Rheumatic | TRUE | 1 | Bursitis of multiple bursa                                         | FALSE |
| CCI score | 765004404 | 4145240  | Charlson - Rheumatic | TRUE | 1 | Renal tubulo-interstitial disorder in systemic lupus erythematosus | FALSE |
| CCI score | 765004404 | 4211842  | Charlson - Rheumatic | TRUE | 1 | Bursitis of hand                                                   | FALSE |
| CCI score | 765004404 | 35609010 | Charlson - Rheumatic | TRUE | 1 | Rheumatoid arthritis of right shoulder                             | FALSE |
| CCI score | 765004404 | 46273162 | Charlson - Rheumatic | TRUE | 1 | Bursitis of elbow                                                  | FALSE |
| CCI score | 765004404 | 46273369 | Charlson - Rheumatic | TRUE | 1 | Endocarditis due to systemic lupus erythematosus                   | FALSE |
| CCI score | 765004404 | 80182    | Charlson - Rheumatic | TRUE | 1 | Dermatomyositis                                                    | FALSE |
| CCI score | 765004404 | 80809    | Charlson - Rheumatic | TRUE | 1 | Rheumatoid arthritis                                               | FALSE |
| CCI score | 765004404 | 319825   | Charlson - Rheumatic | TRUE | 1 | Rheumatic heart disease                                            | FALSE |
| CCI score | 765004404 | 4005037  | Charlson - Rheumatic | TRUE | 1 | Childhood type dermatomyositis                                     | FALSE |
| CCI score | 765004404 | 4102493  | Charlson - Rheumatic | TRUE | 1 | Polyneuropathy in rheumatoid arthritis                             | FALSE |
| CCI score | 765004404 | 4115161  | Charlson - Rheumatic | TRUE | 1 | Rheumatoid arthritis - hand joint                                  | FALSE |
| CCI score | 765004404 | 4142899  | Charlson - Rheumatic | TRUE | 1 | Subcutaneous rheumatoid nodule                                     | FALSE |
| CCI score | 765004404 | 4343935  | Charlson - Rheumatic | TRUE | 1 | Giant cell arteritis with polymyalgia rheumatica                   | FALSE |
| CCI score | 765004404 | 4344161  | Charlson - Rheumatic | TRUE | 1 | Dermatomyositis with malignant disease                             | FALSE |
| CCI score | 765004404 | 4344258  | Charlson - Rheumatic | TRUE | 1 | Bursitis of shoulder                                               | FALSE |
| CCI score | 765004404 | 36685020 | Charlson - Rheumatic | TRUE | 1 | Rheumatoid arthritis of left wrist                                 | FALSE |

**White Paper:** Can longitudinal electronic health record data identify patients at higher risk of developing long COVID?

|           |           |          |                      |      |   |                                                                 |       |
|-----------|-----------|----------|----------------------|------|---|-----------------------------------------------------------------|-------|
| CCI score | 765004404 | 36685024 | Charlson - Rheumatic | TRUE | 1 | Rheumatoid arthritis of right wrist                             | FALSE |
| CCI score | 765004404 | 37108605 | Charlson - Rheumatic | TRUE | 1 | Arthritis of left elbow                                         | FALSE |
| CCI score | 765004404 | 37108606 | Charlson - Rheumatic | TRUE | 1 | Arthritis of left wrist                                         | FALSE |
| CCI score | 765004404 | 37119224 | Charlson - Rheumatic | TRUE | 1 | Arthritis of right elbow                                        | FALSE |
| CCI score | 765004404 | 42534836 | Charlson - Rheumatic | TRUE | 1 | Rheumatoid arthritis of right hand                              | FALSE |
| CCI score | 765004404 | 762446   | Charlson - Rheumatic | TRUE | 1 | Arthropathy of multiple joints                                  | FALSE |
| CCI score | 765004404 | 4009619  | Charlson - Rheumatic | TRUE | 1 | Bursitis of knee                                                | FALSE |
| CCI score | 765004404 | 4083556  | Charlson - Rheumatic | TRUE | 1 | Seronegative rheumatoid arthritis                               | FALSE |
| CCI score | 765004404 | 4105026  | Charlson - Rheumatic | TRUE | 1 | Myopathy due to systemic sclerosis                              | FALSE |
| CCI score | 765004404 | 4116151  | Charlson - Rheumatic | TRUE | 1 | Rheumatoid arthritis of knee                                    | FALSE |
| CCI score | 765004404 | 4116440  | Charlson - Rheumatic | TRUE | 1 | Rheumatoid arthritis of elbow                                   | FALSE |
| CCI score | 765004404 | 4116441  | Charlson - Rheumatic | TRUE | 1 | Rheumatoid arthritis of wrist                                   | FALSE |
| CCI score | 765004404 | 4149913  | Charlson - Rheumatic | TRUE | 1 | Systemic lupus erythematosus with pericarditis                  | FALSE |
| CCI score | 765004404 | 36685022 | Charlson - Rheumatic | TRUE | 1 | Rheumatoid arthritis of right elbow                             | FALSE |
| CCI score | 765004404 | 42534835 | Charlson - Rheumatic | TRUE | 1 | Rheumatoid arthritis of left hip                                | FALSE |
| CCI score | 765004404 | 257628   | Charlson - Rheumatic | TRUE | 1 | Systemic lupus erythematosus                                    | FALSE |
| CCI score | 765004404 | 4063582  | Charlson - Rheumatic | TRUE | 1 | Systemic sclerosis induced by drugs and chemicals               | FALSE |
| CCI score | 765004404 | 4114439  | Charlson - Rheumatic | TRUE | 1 | Rheumatoid arthritis of shoulder                                | FALSE |
| CCI score | 765004404 | 4117686  | Charlson - Rheumatic | TRUE | 1 | Rheumatoid arthritis of multiple joints                         | FALSE |
| CCI score | 765004404 | 4305027  | Charlson - Rheumatic | TRUE | 1 | Finding of ankle or foot                                        | FALSE |
| CCI score | 765004404 | 37108614 | Charlson - Rheumatic | TRUE | 1 | Arthritis of right ankle                                        | FALSE |
| CCI score | 765004404 | 37395590 | Charlson - Rheumatic | TRUE | 1 | Rheumatoid lung disease with rheumatoid arthritis               | FALSE |
| CCI score | 652711186 | 381591   | Charlson - Stroke    | TRUE | 1 | Cerebrovascular disease                                         | FALSE |
| CCI score | 652711186 | 434657   | Charlson - Stroke    | TRUE | 1 | Weakness of face muscles                                        | FALSE |
| CCI score | 652711186 | 436430   | Charlson - Stroke    | TRUE | 1 | Nontraumatic extradural hemorrhage                              | FALSE |
| CCI score | 652711186 | 443551   | Charlson - Stroke    | TRUE | 1 | Apraxia due to cerebrovascular accident                         | FALSE |
| CCI score | 652711186 | 443599   | Charlson - Stroke    | TRUE | 1 | Paralytic syndrome of nondominant side as late effect of stroke | FALSE |
| CCI score | 652711186 | 443916   | Charlson - Stroke    | TRUE | 1 | Hereditary disease                                              | FALSE |
| CCI score | 652711186 | 4027461  | Charlson - Stroke    | TRUE | 1 | Leukoencephalopathy                                             | FALSE |
| CCI score | 652711186 | 4110192  | Charlson - Stroke    | TRUE | 1 | Cerebral infarction due to thrombosis of cerebral arteries      | FALSE |

**White Paper:** Can longitudinal electronic health record data identify patients at higher risk of developing long COVID?

|           |           |          |                   |      |   |                                                                                            |       |
|-----------|-----------|----------|-------------------|------|---|--------------------------------------------------------------------------------------------|-------|
| CCI score | 652711186 | 4110194  | Charlson - Stroke | TRUE | 1 | Middle cerebral artery syndrome                                                            | FALSE |
| CCI score | 652711186 | 4111708  | Charlson - Stroke | TRUE | 1 | Subarachnoid hemorrhage from vertebral artery                                              | FALSE |
| CCI score | 652711186 | 4164092  | Charlson - Stroke | TRUE | 1 | Acute cerebrovascular insufficiency                                                        | FALSE |
| CCI score | 652711186 | 4190891  | Charlson - Stroke | TRUE | 1 | Cerebral autosomal dominant arteriopathy with subcortical infarcts and leukoencephalopathy | FALSE |
| CCI score | 652711186 | 40479575 | Charlson - Stroke | TRUE | 1 | Dysphasia as late effect of cerebrovascular disease                                        | FALSE |
| CCI score | 652711186 | 40480002 | Charlson - Stroke | TRUE | 1 | Aphasia as late effect of cerebrovascular disease                                          | FALSE |
| CCI score | 652711186 | 43530727 | Charlson - Stroke | TRUE | 1 | Spontaneous cerebral hemorrhage                                                            | FALSE |
| CCI score | 652711186 | 43530742 | Charlson - Stroke | TRUE | 1 | Paralytic syndrome on one side of the body as late effect of cerebrovascular accident      | FALSE |
| CCI score | 652711186 | 43530744 | Charlson - Stroke | TRUE | 1 | Weakness of face muscles as sequela of stroke                                              | FALSE |
| CCI score | 652711186 | 45772786 | Charlson - Stroke | TRUE | 1 | Cerebral infarction due to embolism of middle cerebral artery                              | FALSE |
| CCI score | 652711186 | 45773220 | Charlson - Stroke | TRUE | 1 | Reversible cerebral vasoconstriction syndrome                                              | FALSE |
| CCI score | 652711186 | 197303   | Charlson - Stroke | TRUE | 1 | Monoplegia of dominant lower limb as a late effect of cerebrovascular accident             | FALSE |
| CCI score | 652711186 | 314667   | Charlson - Stroke | TRUE | 1 | Nonpyogenic thrombosis of intracranial venous sinus                                        | FALSE |
| CCI score | 652711186 | 372654   | Charlson - Stroke | TRUE | 1 | Paralytic syndrome as late effect of stroke                                                | FALSE |
| CCI score | 652711186 | 374055   | Charlson - Stroke | TRUE | 1 | Basilar artery syndrome                                                                    | FALSE |
| CCI score | 652711186 | 374384   | Charlson - Stroke | TRUE | 1 | Cerebral ischemia                                                                          | FALSE |
| CCI score | 652711186 | 432923   | Charlson - Stroke | TRUE | 1 | Subarachnoid hemorrhage                                                                    | FALSE |
| CCI score | 652711186 | 4043731  | Charlson - Stroke | TRUE | 1 | Infarction - precerebral                                                                   | FALSE |
| CCI score | 652711186 | 4045738  | Charlson - Stroke | TRUE | 1 | Pure sensory lacunar infarction                                                            | FALSE |
| CCI score | 652711186 | 4111717  | Charlson - Stroke | TRUE | 1 | Occlusion and stenosis of posterior cerebral artery                                        | FALSE |
| CCI score | 652711186 | 4111720  | Charlson - Stroke | TRUE | 1 | Sequelae of subarachnoid hemorrhage                                                        | FALSE |
| CCI score | 652711186 | 4153380  | Charlson - Stroke | TRUE | 1 | Disorder of carotid artery                                                                 | FALSE |
| CCI score | 652711186 | 40481842 | Charlson - Stroke | TRUE | 1 | Monoplegia of upper limb as late effect of cerebrovascular disease                         | FALSE |
| CCI score | 652711186 | 312938   | Charlson - Stroke | TRUE | 1 | Hypertensive encephalopathy                                                                | FALSE |
| CCI score | 652711186 | 443454   | Charlson - Stroke | TRUE | 1 | Cerebral infarction                                                                        | FALSE |
| CCI score | 652711186 | 443525   | Charlson - Stroke | TRUE | 1 | Monoplegia of dominant upper limb as a late effect of cerebrovascular accident             | FALSE |
| CCI score | 652711186 | 4045737  | Charlson - Stroke | TRUE | 1 | Pure motor lacunar infarction                                                              | FALSE |
| CCI score | 652711186 | 4045749  | Charlson - Stroke | TRUE | 1 | Cerebral amyloid angiopathy                                                                | FALSE |
| CCI score | 652711186 | 4049659  | Charlson - Stroke | TRUE | 1 | Subcortical hemorrhage                                                                     | FALSE |

**White Paper:** Can longitudinal electronic health record data identify patients at higher risk of developing long COVID?

|           |           |          |                   |      |   |                                                                                   |       |
|-----------|-----------|----------|-------------------|------|---|-----------------------------------------------------------------------------------|-------|
| CCI score | 652711186 | 4110186  | Charlson - Stroke | TRUE | 1 | Intracerebral hemorrhage, multiple localized                                      | FALSE |
| CCI score | 652711186 | 4110190  | Charlson - Stroke | TRUE | 1 | Cerebral infarction due to embolism of precerebral arteries                       | FALSE |
| CCI score | 652711186 | 4110195  | Charlson - Stroke | TRUE | 1 | Posterior cerebral artery syndrome                                                | FALSE |
| CCI score | 652711186 | 4353709  | Charlson - Stroke | TRUE | 1 | Intracerebral vascular finding                                                    | FALSE |
| CCI score | 652711186 | 40480946 | Charlson - Stroke | TRUE | 1 | Monoplegia of nondominant lower limb as a late effect of cerebrovascular accident | FALSE |
| CCI score | 652711186 | 43022059 | Charlson - Stroke | TRUE | 1 | Disease of non-coronary systemic artery                                           | FALSE |
| CCI score | 652711186 | 43530851 | Charlson - Stroke | TRUE | 1 | Chronic non-traumatic intracranial subdural hemorrhage                            | FALSE |
| CCI score | 652711186 | 321887   | Charlson - Stroke | TRUE | 1 | Disorder of artery                                                                | FALSE |
| CCI score | 652711186 | 380747   | Charlson - Stroke | TRUE | 1 | Cerebral arteritis                                                                | FALSE |
| CCI score | 652711186 | 381036   | Charlson - Stroke | TRUE | 1 | Multiple AND bilateral precerebral artery stenosis                                | FALSE |
| CCI score | 652711186 | 433195   | Charlson - Stroke | TRUE | 1 | Transient arterial retinal occlusion                                              | FALSE |
| CCI score | 652711186 | 434056   | Charlson - Stroke | TRUE | 1 | Late effects of cerebrovascular disease                                           | FALSE |
| CCI score | 652711186 | 437306   | Charlson - Stroke | TRUE | 1 | Transient global amnesia                                                          | FALSE |
| CCI score | 652711186 | 443465   | Charlson - Stroke | TRUE | 1 | Dysphagia as a late effect of cerebrovascular accident                            | FALSE |
| CCI score | 652711186 | 4111709  | Charlson - Stroke | TRUE | 1 | Non-traumatic subdural hemorrhage                                                 | FALSE |
| CCI score | 652711186 | 4111711  | Charlson - Stroke | TRUE | 1 | Cerebellar stroke syndrome                                                        | FALSE |
| CCI score | 652711186 | 4111715  | Charlson - Stroke | TRUE | 1 | Occlusion and stenosis of cerebral arteries, not resulting in cerebral infarction | FALSE |
| CCI score | 652711186 | 4111716  | Charlson - Stroke | TRUE | 1 | Occlusion and stenosis of anterior cerebral artery                                | FALSE |
| CCI score | 652711186 | 4112023  | Charlson - Stroke | TRUE | 1 | Occlusion and stenosis of middle cerebral artery                                  | FALSE |
| CCI score | 652711186 | 4112024  | Charlson - Stroke | TRUE | 1 | Occlusion and stenosis of cerebellar arteries                                     | FALSE |
| CCI score | 652711186 | 4144154  | Charlson - Stroke | TRUE | 1 | Non-traumatic intracerebral ventricular hemorrhage                                | FALSE |
| CCI score | 652711186 | 4148906  | Charlson - Stroke | TRUE | 1 | Spontaneous subarachnoid hemorrhage                                               | FALSE |
| CCI score | 652711186 | 4319328  | Charlson - Stroke | TRUE | 1 | Brain stem hemorrhage                                                             | FALSE |
| CCI score | 652711186 | 4332246  | Charlson - Stroke | TRUE | 1 | Aneurysm                                                                          | FALSE |
| CCI score | 652711186 | 40480938 | Charlson - Stroke | TRUE | 1 | Monoplegia of lower limb as late effect of cerebrovascular disease                | FALSE |
| CCI score | 652711186 | 40481354 | Charlson - Stroke | TRUE | 1 | Speech and language deficit as late effect of cerebrovascular accident            | FALSE |
| CCI score | 652711186 | 42535425 | Charlson - Stroke | TRUE | 1 | Spontaneous hemorrhage of cerebral hemisphere                                     | FALSE |
| CCI score | 652711186 | 43530674 | Charlson - Stroke | TRUE | 1 | Spontaneous cerebellar hemorrhage                                                 | FALSE |
| CCI score | 652711186 | 46273649 | Charlson - Stroke | TRUE | 1 | Cerebral infarction due to occlusion of basilar artery                            | FALSE |

**White Paper:** Can longitudinal electronic health record data identify patients at higher risk of developing long COVID?

|           |           |          |                   |      |   |                                                                                   |       |
|-----------|-----------|----------|-------------------|------|---|-----------------------------------------------------------------------------------|-------|
| CCI score | 652711186 | 373503   | Charlson - Stroke | TRUE | 1 | Transient cerebral ischemia                                                       | FALSE |
| CCI score | 652711186 | 378774   | Charlson - Stroke | TRUE | 1 | Moyamoya disease                                                                  | FALSE |
| CCI score | 652711186 | 443609   | Charlson - Stroke | TRUE | 1 | Paralytic syndrome of dominant side as late effect of stroke                      | FALSE |
| CCI score | 652711186 | 4006294  | Charlson - Stroke | TRUE | 1 | Basilar artery embolism                                                           | FALSE |
| CCI score | 652711186 | 4046360  | Charlson - Stroke | TRUE | 1 | Lacunar infarction                                                                | FALSE |
| CCI score | 652711186 | 4111710  | Charlson - Stroke | TRUE | 1 | Brainstem stroke syndrome                                                         | FALSE |
| CCI score | 652711186 | 4112020  | Charlson - Stroke | TRUE | 1 | Carotid artery syndrome hemispheric                                               | FALSE |
| CCI score | 652711186 | 4112026  | Charlson - Stroke | TRUE | 1 | Sequelae of cerebral infarction                                                   | FALSE |
| CCI score | 652711186 | 4180158  | Charlson - Stroke | TRUE | 1 | Hereditary disorder by system                                                     | FALSE |
| CCI score | 652711186 | 4274969  | Charlson - Stroke | TRUE | 1 | Vertebral artery embolism                                                         | FALSE |
| CCI score | 652711186 | 4338227  | Charlson - Stroke | TRUE | 1 | Basilar artery thrombosis                                                         | FALSE |
| CCI score | 652711186 | 37016924 | Charlson - Stroke | TRUE | 1 | Dissection of cerebral artery                                                     | FALSE |
| CCI score | 652711186 | 40482266 | Charlson - Stroke | TRUE | 1 | Monoplegia of nondominant upper limb as a late effect of cerebrovascular accident | FALSE |
| CCI score | 652711186 | 42872891 | Charlson - Stroke | TRUE | 1 | Posterior reversible encephalopathy syndrome                                      | FALSE |
| CCI score | 652711186 | 43530687 | Charlson - Stroke | TRUE | 1 | Dysarthria as late effects of cerebrovascular disease                             | FALSE |
| CCI score | 652711186 | 43530688 | Charlson - Stroke | TRUE | 1 | Fluency disorder as sequela of cerebrovascular disease                            | FALSE |
| CCI score | 652711186 | 43531622 | Charlson - Stroke | TRUE | 1 | Ataxia as sequela of cerebrovascular disease                                      | FALSE |
| CCI score | 652711186 | 45767658 | Charlson - Stroke | TRUE | 1 | Cerebral infarction due to thrombosis of middle cerebral artery                   | FALSE |
| CCI score | 652711186 | 255919   | Charlson - Stroke | TRUE | 1 | Finding of head and neck region                                                   | FALSE |
| CCI score | 652711186 | 313226   | Charlson - Stroke | TRUE | 1 | Carotid artery occlusion                                                          | FALSE |
| CCI score | 652711186 | 316437   | Charlson - Stroke | TRUE | 1 | Cerebral atherosclerosis                                                          | FALSE |
| CCI score | 652711186 | 4108360  | Charlson - Stroke | TRUE | 1 | Anterior cerebral artery syndrome                                                 | FALSE |
| CCI score | 652711186 | 4108952  | Charlson - Stroke | TRUE | 1 | Subarachnoid hemorrhage from carotid siphon and bifurcation                       | FALSE |
| CCI score | 652711186 | 4110189  | Charlson - Stroke | TRUE | 1 | Cerebral infarct due to thrombosis of precerebral arteries                        | FALSE |
| CCI score | 652711186 | 4111714  | Charlson - Stroke | TRUE | 1 | Cerebral infarction due to cerebral venous thrombosis, non-pyogenic               | FALSE |
| CCI score | 652711186 | 4111721  | Charlson - Stroke | TRUE | 1 | Sequelae of intracerebral hemorrhage                                              | FALSE |
| CCI score | 652711186 | 4159164  | Charlson - Stroke | TRUE | 1 | Disorder of basilar artery                                                        | FALSE |
| CCI score | 652711186 | 4176892  | Charlson - Stroke | TRUE | 1 | Cortical hemorrhage                                                               | FALSE |
| CCI score | 652711186 | 4213731  | Charlson - Stroke | TRUE | 1 | Carotid artery embolism                                                           | FALSE |

**White Paper:** Can longitudinal electronic health record data identify patients at higher risk of developing long COVID?

|           |           |          |                   |      |   |                                                                                                  |       |
|-----------|-----------|----------|-------------------|------|---|--------------------------------------------------------------------------------------------------|-------|
| CCI score | 652711186 | 4273526  | Charlson - Stroke | TRUE | 1 | Vertebral artery thrombosis                                                                      | FALSE |
| CCI score | 652711186 | 4311124  | Charlson - Stroke | TRUE | 1 | Carotid artery thrombosis                                                                        | FALSE |
| CCI score | 652711186 | 40482301 | Charlson - Stroke | TRUE | 1 | Residual cognitive deficit as late effect of cerebrovascular accident                            | FALSE |
| CCI score | 652711186 | 44782781 | Charlson - Stroke | TRUE | 1 | Hemiplegia and/or hemiparesis following stroke                                                   | FALSE |
| CCI score | 652711186 | 45766121 | Charlson - Stroke | TRUE | 1 | Cerebral vasoconstriction syndrome                                                               | FALSE |
| CCI score | 652711186 | 46270031 | Charlson - Stroke | TRUE | 1 | Cerebral infarction due to occlusion of precerebral artery                                       | FALSE |
| CCI score | 652711186 | 372924   | Charlson - Stroke | TRUE | 1 | Cerebral artery occlusion                                                                        | FALSE |
| CCI score | 652711186 | 443239   | Charlson - Stroke | TRUE | 1 | Precerebral arterial occlusion                                                                   | FALSE |
| CCI score | 652711186 | 4108356  | Charlson - Stroke | TRUE | 1 | Cerebral infarction due to embolism of cerebral arteries                                         | FALSE |
| CCI score | 652711186 | 4288310  | Charlson - Stroke | TRUE | 1 | Carotid artery obstruction                                                                       | FALSE |
| CCI score | 652711186 | 4338523  | Charlson - Stroke | TRUE | 1 | Amaurosis fugax                                                                                  | FALSE |
| CCI score | 652711186 | 44782753 | Charlson - Stroke | TRUE | 1 | Weakness as a late effect of stroke                                                              | FALSE |
| CCI score | 382527336 | 439727   | hiv infect ion    | TRUE | 2 | Human immunodeficiency virus infection                                                           | FALSE |
| CCI score | 382527336 | 4013106  | hiv infect ion    | TRUE | 2 | HIV positive                                                                                     | FALSE |
| CCI score | 382527336 | 4047624  | hiv infect ion    | TRUE | 2 | Human immunodeficiency virus leukoencephalopathy                                                 | FALSE |
| CCI score | 382527336 | 4087603  | hiv infect ion    | TRUE | 2 | Human immunodeficiency virus infection constitutional disease                                    | FALSE |
| CCI score | 382527336 | 4172009  | hiv infect ion    | TRUE | 2 | HIV infection with infectious mononucleosis-like syndrome                                        | FALSE |
| CCI score | 382527336 | 4201627  | hiv infect ion    | TRUE | 2 | HIV infection with aseptic meningitis                                                            | FALSE |
| CCI score | 382527336 | 4262297  | hiv infect ion    | TRUE | 2 | Human immunodeficiency virus encephalopathy                                                      | FALSE |
| CCI score | 382527336 | 36674253 | hiv infect ion    | TRUE | 2 | Infection caused by Toxoplasma gondii co-occurrent with acquired immunodeficiency syndrome       | FALSE |
| CCI score | 382527336 | 37017092 | hiv infect ion    | TRUE | 2 | Candidiasis of esophagus co-occurrent with human immunodeficiency virus infection                | FALSE |
| CCI score | 382527336 | 37017124 | hiv infect ion    | TRUE | 2 | Infection caused by Strongyloides co-occurrent with human immunodeficiency virus infection       | FALSE |
| CCI score | 382527336 | 37017260 | hiv infect ion    | TRUE | 2 | Disorder of kidney co-occurrent with human immunodeficiency virus infection                      | FALSE |
| CCI score | 382527336 | 37017261 | hiv infect ion    | TRUE | 2 | Gastrointestinal malabsorption syndrome co-occurrent with human immunodeficiency virus infection | FALSE |
| CCI score | 382527336 | 37017276 | hiv infect ion    | TRUE | 2 | Cardiomyopathy co-occurrent with human immunodeficiency virus infection                          | FALSE |
| CCI score | 382527336 | 37017283 | hiv infect ion    | TRUE | 2 | Visual impairment co-occurrent with human immunodeficiency virus infection                       | FALSE |
| CCI score | 382527336 | 37017320 | hiv infect ion    | TRUE | 2 | Malignant neoplastic disease co-occurrent with human immunodeficiency virus infection            | FALSE |

**White Paper:** Can longitudinal electronic health record data identify patients at higher risk of developing long COVID?

|           |           |          |                |      |   |                                                                                                    |       |
|-----------|-----------|----------|----------------|------|---|----------------------------------------------------------------------------------------------------|-------|
| CCI score | 382527336 | 37017424 | hiv infect ion | TRUE | 2 | Nephrotic syndrome co-occurrent with human immunodeficiency virus infection                        | FALSE |
| CCI score | 382527336 | 37017446 | hiv infect ion | TRUE | 2 | Infection caused by Cytomegalovirus co-occurrent with human immunodeficiency virus infection       | FALSE |
| CCI score | 382527336 | 37017457 | hiv infect ion | TRUE | 2 | Infection caused by herpes zoster virus co-occurrent with human immunodeficiency virus infection   | FALSE |
| CCI score | 382527336 | 37017549 | hiv infect ion | TRUE | 2 | Dementia co-occurrent with human immunodeficiency virus infection                                  | FALSE |
| CCI score | 382527336 | 37019058 | hiv infect ion | TRUE | 2 | Bacterial pneumonia co-occurrent with human immunodeficiency virus infection                       | FALSE |
| CCI score | 382527336 | 42536595 | hiv infect ion | TRUE | 2 | Human immunodeficiency virus World Health Organization 2007 stage 4 co-occurrent with tuberculosis | FALSE |
| CCI score | 382527336 | 42538959 | hiv infect ion | TRUE | 2 | Asymptomatic human immunodeficiency virus A1 infection                                             | FALSE |
| CCI score | 382527336 | 44783356 | hiv infect ion | TRUE | 2 | Human immunodeficiency virus carrier                                                               | FALSE |
| CCI score | 382527336 | 45757102 | hiv infect ion | TRUE | 2 | Acquired immune deficiency syndrome complicating childbirth                                        | FALSE |
| CCI score | 382527336 | 432554   | hiv infect ion | TRUE | 2 | Human immunodeficiency virus II infection                                                          | FALSE |
| CCI score | 382527336 | 4008081  | hiv infect ion | TRUE | 2 | Acute HIV infection                                                                                | FALSE |
| CCI score | 382527336 | 36674254 | hiv infect ion | TRUE | 2 | Infection caused by Isospora co-occurrent with acquired immunodeficiency syndrome                  | FALSE |
| CCI score | 382527336 | 36687122 | hiv infect ion | TRUE | 2 | Human immunodeficiency virus infection with cognitive impairment                                   | FALSE |
| CCI score | 382527336 | 37017071 | hiv infect ion | TRUE | 2 | Subacute adenoviral encephalitis co-occurrent with human immunodeficiency virus infection          | FALSE |
| CCI score | 382527336 | 37017082 | hiv infect ion | TRUE | 2 | Splenomegaly co-occurrent with human immunodeficiency virus infection                              | FALSE |
| CCI score | 382527336 | 37017093 | hiv infect ion | TRUE | 2 | Heart disease co-occurrent with human immunodeficiency virus infection                             | FALSE |
| CCI score | 382527336 | 37017108 | hiv infect ion | TRUE | 2 | Myocarditis co-occurrent with human immunodeficiency virus infection                               | FALSE |
| CCI score | 382527336 | 37017249 | hiv infect ion | TRUE | 2 | Organic brain syndrome co-occurrent with human immunodeficiency virus infection                    | FALSE |
| CCI score | 382527336 | 37017279 | hiv infect ion | TRUE | 2 | Disorder of peripheral nervous system co-occurrent with human immunodeficiency virus infection     | FALSE |
| CCI score | 382527336 | 37017284 | hiv infect ion | TRUE | 2 | Infective arthritis co-occurrent with human immunodeficiency virus infection                       | FALSE |
| CCI score | 382527336 | 37017285 | hiv infect ion | TRUE | 2 | Acquired hemolytic anemia co-occurrent with human immunodeficiency virus infection                 | FALSE |
| CCI score | 382527336 | 37017295 | hiv infect ion | TRUE | 2 | Infection caused by Nocardia co-occurrent with human immunodeficiency virus infection              | FALSE |
| CCI score | 382527336 | 37017454 | hiv infect ion | TRUE | 2 | Infection caused by herpes simplex virus co-occurrent with human immunodeficiency virus infection  | FALSE |
| CCI score | 382527336 | 37017455 | hiv infect ion | TRUE | 2 | Pyrexia of unknown origin co-occurrent with human immunodeficiency virus                           | FALSE |



**White Paper:** Can longitudinal electronic health record data identify patients at higher risk of developing long COVID?

|           |           |          |                |      |   | infection                                                                                                        |       |
|-----------|-----------|----------|----------------|------|---|------------------------------------------------------------------------------------------------------------------|-------|
| CCI score | 382527336 | 37017456 | hiv infect ion | TRUE | 2 | Aspergillosis co-occurrent with human immunodeficiency virus infection                                           | FALSE |
| CCI score | 382527336 | 37017579 | hiv infect ion | TRUE | 2 | Opportunistic mycosis co-occurrent with human immunodeficiency virus infection                                   | FALSE |
| CCI score | 382527336 | 37017586 | hiv infect ion | TRUE | 2 | Focal segmental glomerulosclerosis co-occurrent with human immunodeficiency virus infection                      | FALSE |
| CCI score | 382527336 | 37017655 | hiv infect ion | TRUE | 2 | Disseminated atypical infection caused by Mycobacterium co-occurrent with human immunodeficiency virus infection | FALSE |
| CCI score | 382527336 | 37018711 | hiv infect ion | TRUE | 2 | Disorder of eye proper co-occurrent with human immunodeficiency virus infection                                  | FALSE |
| CCI score | 382527336 | 37018935 | hiv infect ion | TRUE | 2 | Dermatophytosis co-occurrent with human immunodeficiency virus infection                                         | FALSE |
| CCI score | 382527336 | 42538960 | hiv infect ion | TRUE | 2 | Asymptomatic human immunodeficiency virus A2 infection                                                           | FALSE |
| CCI score | 382527336 | 42539031 | hiv infect ion | TRUE | 2 | Human immunodeficiency virus World Health Organization 2007 stage 3 co-occurrent with tuberculosis               | FALSE |
| CCI score | 382527336 | 43531586 | hiv infect ion | TRUE | 2 | Symptomatic human immunodeficiency virus infection                                                               | FALSE |
| CCI score | 382527336 | 4180254  | hiv infect ion | TRUE | 2 | Congenital human immunodeficiency virus infection                                                                | FALSE |
| CCI score | 382527336 | 4239722  | hiv infect ion | TRUE | 2 | Asymptomatic human immunodeficiency virus infection in pregnancy                                                 | FALSE |
| CCI score | 382527336 | 36674252 | hiv infect ion | TRUE | 2 | Infection caused by Coccidia co-occurrent with acquired immunodeficiency syndrome                                | FALSE |
| CCI score | 382527336 | 36715476 | hiv infect ion | TRUE | 2 | Human immunodeficiency virus complicating pregnancy childbirth and the puerperium                                | FALSE |
| CCI score | 382527336 | 36716524 | hiv infect ion | TRUE | 2 | Parkinsonism due to human immunodeficiency virus infection                                                       | FALSE |
| CCI score | 382527336 | 37017126 | hiv infect ion | TRUE | 2 | Myelitis co-occurrent with human immunodeficiency virus infection                                                | FALSE |
| CCI score | 382527336 | 37017132 | hiv infect ion | TRUE | 2 | Anemia co-occurrent with human immunodeficiency virus infection                                                  | FALSE |
| CCI score | 382527336 | 37017247 | hiv infect ion | TRUE | 2 | Presenile dementia co-occurrent with human immunodeficiency virus infection                                      | FALSE |
| CCI score | 382527336 | 37017248 | hiv infect ion | TRUE | 2 | Infection caused by Pneumocystis co-occurrent with human immunodeficiency virus infection                        | FALSE |
| CCI score | 382527336 | 37017259 | hiv infect ion | TRUE | 2 | Disorder of spinal cord co-occurrent with human immunodeficiency virus infection                                 | FALSE |
| CCI score | 382527336 | 37018063 | hiv infect ion | TRUE | 2 | Immune reconstitution inflammatory syndrome caused by human immunodeficiency virus infection                     | FALSE |
| CCI score | 382527336 | 37018714 | hiv infect ion | TRUE | 2 | Radiculitis co-occurrent with human immunodeficiency virus infection                                             | FALSE |
| CCI score | 382527336 | 37019034 | hiv infect ion | TRUE | 2 | Neuralgia co-occurrent with human immunodeficiency virus infection                                               | FALSE |
| CCI score | 382527336 | 37116830 | hiv infect ion | TRUE | 2 | Invasive carcinoma of uterine cervix co-occurrent with human immunodeficiency virus infection                    | FALSE |

**White Paper:** Can longitudinal electronic health record data identify patients at higher risk of developing long COVID?

|           |           |          |               |      |   |                                                                                                            |       |
|-----------|-----------|----------|---------------|------|---|------------------------------------------------------------------------------------------------------------|-------|
| CCI score | 382527336 | 42536594 | hiv infection | TRUE | 2 | Human immunodeficiency virus World Health Organization 2007 stage 3 co-occurrent with malaria              | FALSE |
| CCI score | 382527336 | 42536596 | hiv infection | TRUE | 2 | Human immunodeficiency virus World Health Organization 2007 stage 4 co-occurrent with malaria              | FALSE |
| CCI score | 382527336 | 45769839 | hiv infection | TRUE | 2 | Human immunodeficiency virus (HIV) II infection category B1                                                | FALSE |
| CCI score | 382527336 | 45769856 | hiv infection | TRUE | 2 | Human immunodeficiency virus (HIV) infection category B2                                                   | FALSE |
| CCI score | 382527336 | 46284256 | hiv infection | TRUE | 2 | HIV (human immunodeficiency virus) disease resulting in haematological and immunological abnormalities     | FALSE |
| CCI score | 382527336 | 4048033  | hiv infection | TRUE | 2 | Neuropathy due to human immunodeficiency virus                                                             | FALSE |
| CCI score | 382527336 | 4124361  | hiv infection | TRUE | 2 | Human immunodeficiency virus-associated periodontitis                                                      | FALSE |
| CCI score | 382527336 | 37017125 | hiv infection | TRUE | 2 | Disorder of skin co-occurrent with human immunodeficiency virus infection                                  | FALSE |
| CCI score | 382527336 | 37017209 | hiv infection | TRUE | 2 | Hemophagocytic syndrome co-occurrent with human immunodeficiency virus infection                           | FALSE |
| CCI score | 382527336 | 37017246 | hiv infection | TRUE | 2 | Progressive multifocal leukoencephalopathy co-occurrent with human immunodeficiency virus infection        | FALSE |
| CCI score | 382527336 | 37017266 | hiv infection | TRUE | 2 | Acute endocarditis co-occurrent with human immunodeficiency virus infection                                | FALSE |
| CCI score | 382527336 | 37017282 | hiv infection | TRUE | 2 | Agranulocytosis co-occurrent with human immunodeficiency virus infection                                   | FALSE |
| CCI score | 382527336 | 37017318 | hiv infection | TRUE | 2 | Infectious gastroenteritis co-occurrent with human immunodeficiency virus infection                        | FALSE |
| CCI score | 382527336 | 37017442 | hiv infection | TRUE | 2 | Diffuse non-Hodgkin immunoblastic lymphoma co-occurrent with human immunodeficiency virus infection        | FALSE |
| CCI score | 382527336 | 37017453 | hiv infection | TRUE | 2 | Coccidiosis co-occurrent with human immunodeficiency virus infection                                       | FALSE |
| CCI score | 382527336 | 37017652 | hiv infection | TRUE | 2 | Multidermatomal infection caused by Herpes zoster co-occurrent with human immunodeficiency virus infection | FALSE |
| CCI score | 382527336 | 37019055 | hiv infection | TRUE | 2 | Aplastic anemia co-occurrent with human immunodeficiency virus infection                                   | FALSE |
| CCI score | 382527336 | 37116831 | hiv infection | TRUE | 2 | Extrapulmonary tuberculosis co-occurrent with human immunodeficiency virus infection                       | FALSE |
| CCI score | 382527336 | 42536592 | hiv infection | TRUE | 2 | Human immunodeficiency virus World Health Organization 2007 stage 2 co-occurrent with tuberculosis         | FALSE |
| CCI score | 382527336 | 4087604  | hiv infection | TRUE | 2 | Human immunodeficiency virus infection with neurological disease                                           | FALSE |
| CCI score | 382527336 | 4092686  | hiv infection | TRUE | 2 | Human immunodeficiency virus infection with secondary clinical infectious disease                          | FALSE |
| CCI score | 382527336 | 4161950  | hiv infection | TRUE | 2 | Human immunodeficiency virus encephalitis                                                                  | FALSE |
| CCI score | 382527336 | 4171124  | hiv infection | TRUE | 2 | Congenital acquired immune deficiency syndrome                                                             | FALSE |

**White Paper:** Can longitudinal electronic health record data identify patients at higher risk of developing long COVID?

|           |           |          |                |      |   |                                                                                                           |       |
|-----------|-----------|----------|----------------|------|---|-----------------------------------------------------------------------------------------------------------|-------|
| CCI score | 382527336 | 4236860  | hiv infect ion | TRUE | 2 | Pediatric human immunodeficiency virus infection                                                          | FALSE |
| CCI score | 382527336 | 36714339 | hiv infect ion | TRUE | 2 | Candidiasis of upper respiratory tract co-occurrent with human immunodeficiency virus infection           | FALSE |
| CCI score | 382527336 | 37017094 | hiv infect ion | TRUE | 2 | Disorder of gastrointestinal tract co-occurrent with human immunodeficiency virus infection               | FALSE |
| CCI score | 382527336 | 37017106 | hiv infect ion | TRUE | 2 | Eruption of skin co-occurrent with human immunodeficiency virus infection                                 | FALSE |
| CCI score | 382527336 | 37017112 | hiv infect ion | TRUE | 2 | Primary cerebral lymphoma co-occurrent with human immunodeficiency virus infection                        | FALSE |
| CCI score | 382527336 | 37017210 | hiv infect ion | TRUE | 2 | Chronic infection caused by herpes simplex virus co-occurrent with human immunodeficiency virus infection | FALSE |
| CCI score | 382527336 | 37017243 | hiv infect ion | TRUE | 2 | Reticulosarcoma co-occurrent with human immunodeficiency virus infection                                  | FALSE |
| CCI score | 382527336 | 37017265 | hiv infect ion | TRUE | 2 | Enlargement of liver co-occurrent with human immunodeficiency virus infection                             | FALSE |
| CCI score | 382527336 | 37017294 | hiv infect ion | TRUE | 2 | Demyelinating disease of central nervous system co-occurrent with human immunodeficiency virus infection  | FALSE |
| CCI score | 382527336 | 37017296 | hiv infect ion | TRUE | 2 | Isosporiasis co-occurrent with human immunodeficiency virus infection                                     | FALSE |
| CCI score | 382527336 | 37017465 | hiv infect ion | TRUE | 2 | Human immunodeficiency virus antibody positive                                                            | FALSE |
| CCI score | 382527336 | 37017580 | hiv infect ion | TRUE | 2 | Microsporidiosis co-occurrent with human immunodeficiency virus infection                                 | FALSE |
| CCI score | 382527336 | 37017595 | hiv infect ion | TRUE | 2 | Burkitt lymphoma co-occurrent with human immunodeficiency virus infection                                 | FALSE |
| CCI score | 382527336 | 42536590 | hiv infect ion | TRUE | 2 | Human immunodeficiency virus World Health Organization 2007 stage 1 co-occurrent with tuberculosis        | FALSE |
| CCI score | 382527336 | 45757132 | hiv infect ion | TRUE | 2 | Human immunodeficiency virus in mother complicating childbirth                                            | FALSE |
| CCI score | 382527336 | 45769855 | hiv infect ion | TRUE | 2 | Human immunodeficiency virus (HIV) infection category B1                                                  | FALSE |
| CCI score | 382527336 | 45773072 | hiv infect ion | TRUE | 2 | Human immunodeficiency virus (HIV) II infection category B2                                               | FALSE |
| CCI score | 382527336 | 4128060  | hiv infect ion | TRUE | 2 | Acquired immune deficiency syndrome-related nephropathy                                                   | FALSE |
| CCI score | 382527336 | 4225193  | hiv infect ion | TRUE | 2 | Microsporidiosis associated with acquired immunodeficiency syndrome                                       | FALSE |
| CCI score | 382527336 | 4253472  | hiv infect ion | TRUE | 2 | Human immunodeficiency virus I infection                                                                  | FALSE |
| CCI score | 382527336 | 4314426  | hiv infect ion | TRUE | 2 | HIV infection with acute lymphadenitis                                                                    | FALSE |
| CCI score | 382527336 | 4340791  | hiv infect ion | TRUE | 2 | Human immunodeficiency virus enteropathy                                                                  | FALSE |
| CCI score | 382527336 | 37017244 | hiv infect ion | TRUE | 2 | Disorder of respiratory system co-occurrent with human immunodeficiency virus infection                   | FALSE |
| CCI score | 382527336 | 37017278 | hiv infect ion | TRUE | 2 | Recurrent bacterial pneumonia co-occurrent with human immunodeficiency virus infection                    | FALSE |
| CCI score | 382527336 | 37017319 | hiv infect ion | TRUE | 2 | Disorder of central nervous system co-occurrent with human immunodeficiency                               | FALSE |

**White Paper:** Can longitudinal electronic health record data identify patients at higher risk of developing long COVID?

|           |           |          |               |      |   |                                                                                                         |       |
|-----------|-----------|----------|---------------|------|---|---------------------------------------------------------------------------------------------------------|-------|
|           |           |          |               |      |   | virus infection                                                                                         |       |
| CCI score | 382527336 | 37017425 | hiv infection | TRUE | 2 | Renal failure syndrome co-occurrent with human immunodeficiency virus infection                         | FALSE |
| CCI score | 382527336 | 37017550 | hiv infection | TRUE | 2 | Infection caused by Cryptosporidium co-occurrent with human immunodeficiency virus infection            | FALSE |
| CCI score | 382527336 | 37018721 | hiv infection | TRUE | 2 | Polyneuropathy co-occurrent with human immunodeficiency virus infection                                 | FALSE |
| CCI score | 382527336 | 37018755 | hiv infection | TRUE | 2 | Recurrent salmonella sepsis co-occurrent with human immunodeficiency virus infection                    | FALSE |
| CCI score | 382527336 | 37019042 | hiv infection | TRUE | 2 | Infection caused by Salmonella co-occurrent with human immunodeficiency virus infection                 | FALSE |
| CCI score | 382527336 | 37019052 | hiv infection | TRUE | 2 | Disseminated infection caused by Strongyloides co-occurrent with human immunodeficiency virus infection | FALSE |
| CCI score | 382527336 | 42536593 | hiv infection | TRUE | 2 | Human immunodeficiency virus World Health Organization 2007 stage 2 co-occurrent with malaria           | FALSE |
| CCI score | 382527336 | 45769864 | hiv infection | TRUE | 2 | Symptomatic human immunodeficiency virus (HIV) I infection                                              | FALSE |
| CCI score | 382527336 | 4171125  | hiv infection | TRUE | 2 | Congenital human immunodeficiency virus positive status syndrome                                        | FALSE |
| CCI score | 382527336 | 4241530  | hiv infection | TRUE | 2 | Asymptomatic human immunodeficiency virus infection                                                     | FALSE |
| CCI score | 382527336 | 4267414  | hiv infection | TRUE | 2 | AIDS                                                                                                    | FALSE |
| CCI score | 382527336 | 4320032  | hiv infection | TRUE | 2 | Persistent generalized lymphadenopathy                                                                  | FALSE |
| CCI score | 382527336 | 4347288  | hiv infection | TRUE | 2 | Human immunodeficiency virus myopathy                                                                   | FALSE |
| CCI score | 382527336 | 37017254 | hiv infection | TRUE | 2 | Candidiasis of mouth co-occurrent with human immunodeficiency virus infection                           | FALSE |
| CCI score | 382527336 | 37017262 | hiv infection | TRUE | 2 | Neuritis co-occurrent with human immunodeficiency virus infection                                       | FALSE |
| CCI score | 382527336 | 37017263 | hiv infection | TRUE | 2 | Lymphadenopathy co-occurrent with human immunodeficiency virus infection                                | FALSE |
| CCI score | 382527336 | 42536591 | hiv infection | TRUE | 2 | Human immunodeficiency virus World Health Organization 2007 stage 1 co-occurrent with malaria           | FALSE |

567 Abbreviations: CCI: Charlson Comorbidity Index

568

569 [Appendix A2: Qualifying Cognitive Symptoms and OMOP Codes](#)

570 Table of qualifying Cognitive Long COVID symptoms

| phenotype_ | phenotype_label | omop_concept_id | omop_concept_label | omop_concept | omop_standards | omop_domain | omop_value |
|------------|-----------------|-----------------|--------------------|--------------|----------------|-------------|------------|
|------------|-----------------|-----------------|--------------------|--------------|----------------|-------------|------------|

| id         |                                   |          |                                                            | _code       | rd |            | cabulary |
|------------|-----------------------------------|----------|------------------------------------------------------------|-------------|----|------------|----------|
| HP_0001289 | confusion                         | 4164633  | Clouded consciousness                                      | 40917007    | S  | Conditions | SNOMED   |
| HP_0001289 | confusion                         | 381273   | Confusional state                                          | 286933003   | S  | Conditions | SNOMED   |
| HP_0001289 | confusion                         | 4268911  | Disorientated                                              | 62476001    | S  | Conditions | SNOMED   |
| HP_0001289 | confusion                         | 4056930  | Disorientated in time                                      | 19657006    | S  | Conditions | SNOMED   |
| HP_0001289 | confusion                         | 4091700  | Dissociative confusion                                     | 280943007   | S  | Conditions | SNOMED   |
| HP_0001289 | confusion                         | 441540   | Reactive confusion                                         | 191678001   | S  | Conditions | SNOMED   |
| HP_0002354 | memory impairment                 | 439147   | Amnesia                                                    | 48167000    | S  | Conditions | SNOMED   |
| HP_0002354 | memory impairment                 | 4206332  | Forgetful                                                  | 55533009    | S  | Conditions | SNOMED   |
| HP_0002354 | memory impairment                 | 4304008  | Memory impairment                                          | 386807006   | S  | Conditions | SNOMED   |
| HP_0002354 | memory impairment                 | 4229448  | Anterograde amnesia                                        | 88822006    | S  | Conditions | SNOMED   |
| HP_0002354 | memory impairment                 | 4198081  | Retrograde amnesia                                         | 51921000    | S  | Conditions | SNOMED   |
| HP_0002354 | memory impairment                 | 4012209  | Temporary loss of memory                                   | 162200009   | S  | Conditions | SNOMED   |
| HP_0002354 | memory impairment                 | 4085496  | Poor long-term memory                                      | 247588002   | S  | Conditions | SNOMED   |
| HP_0002354 | memory impairment                 | 4084412  | Poor short-term memory                                     | 247592009   | S  | Conditions | SNOMED   |
| HP_0002354 | memory impairment                 | 372608   | Amnesic disorder                                           | 3298001     | S  | Conditions | SNOMED   |
| HP_0002354 | memory impairment                 | 36712678 | Amnesic disorder associated with general medical condition | 1.05451E+14 | S  | Conditions | SNOMED   |
| HP_0002354 | memory impairment                 | 435795   | Fugue                                                      | 80490004    | S  | Conditions | SNOMED   |
| HP_0002354 | memory impairment                 | 4099961  | Mild memory disturbance                                    | 192071009   | S  | Conditions | SNOMED   |
| HP_0002354 | memory impairment                 | 4155096  | Poor historian                                             | 272054000   | S  | Conditions | SNOMED   |
| HP_0002354 | memory impairment                 | 444259   | Psychogenic amnesia                                        | 84209002    | S  | Conditions | SNOMED   |
| HP_0002354 | memory impairment                 | 4145069  | Transient memory loss                                      | 307413004   | S  | Conditions | SNOMED   |
| HP_0031987 | diminished ability to concentrate | 4096147  | Poor concentration                                         | 26329005    | S  | Conditions | SNOMED   |
| HP_0031987 | diminished ability to concentrate | 4243064  | Unable to concentrate                                      | 60032008    | S  | Conditions | SNOMED   |

571

572 [Appendix A3: Qualifying Fatigue Symptoms and OMOP Codes](#)

573 Table of qualifying Fatigue Long COVID symptoms

**White Paper:** Can longitudinal electronic health record data identify patients at higher risk of developing long COVID?

| phenotype_id | phenotype_label | omop_concept_id | omop_concept_label                                  | omop_concept_code | omop_standard | omop_domain | omop_vocabulary |
|--------------|-----------------|-----------------|-----------------------------------------------------|-------------------|---------------|-------------|-----------------|
| HP_0000716   | depressivity    | 440383          | Depressive disorder                                 | 35489007          | S             | Conditions  | SNOMED          |
| HP_0000716   | depressivity    | 433440          | Dysthymia                                           | 78667006          | S             | Conditions  | SNOMED          |
| HP_0000716   | depressivity    | 4191716         | Symptoms of depression                              | 394924000         | S             | Conditions  | SNOMED          |
| HP_0000716   | depressivity    | 37016718        | Acute depression                                    | 712823008         | S             | Conditions  | SNOMED          |
| HP_0000716   | depressivity    | 4103574         | Chronic depression                                  | 192080009         | S             | Conditions  | SNOMED          |
| HP_0000716   | depressivity    | 40546087        | Depressed mood                                      | 366979004         | S             | Conditions  | SNOMED          |
| HP_0000716   | depressivity    | 4149320         | Mild depression                                     | 310495003         | S             | Conditions  | SNOMED          |
| HP_0000716   | depressivity    | 4336957         | Mild major depression                               | 87512008          | S             | Conditions  | SNOMED          |
| HP_0000716   | depressivity    | 4151170         | Moderate depression                                 | 310496002         | S             | Conditions  | SNOMED          |
| HP_0000716   | depressivity    | 4307111         | Moderate major depression                           | 832007            | S             | Conditions  | SNOMED          |
| HP_0000716   | depressivity    | 36717092        | Moderately severe depression                        | 719593009         | S             | Conditions  | SNOMED          |
| HP_0000716   | depressivity    | 36714389        | Moderately severe major depression                  | 719592004         | S             | Conditions  | SNOMED          |
| HP_0000716   | depressivity    | 4149321         | Severe depression                                   | 310497006         | S             | Conditions  | SNOMED          |
| HP_0000716   | depressivity    | 42872722        | Severe major depression                             | 450714000         | S             | Conditions  | SNOMED          |
| HP_0000739   | anxiety         | 441542          | Anxiety                                             | 48694002          | S             | Conditions  | SNOMED          |
| HP_0000739   | anxiety         | 4087190         | Performance anxiety                                 | 279622009         | S             | Conditions  | SNOMED          |
| HP_0000739   | anxiety         | 442077          | Anxiety disorder                                    | 197480006         | S             | Conditions  | SNOMED          |
| HP_0000739   | anxiety         | 4199892         | Anxiety disorder due to a general medical condition | 52910006          | S             | Conditions  | SNOMED          |
| HP_0000739   | anxiety         | 381537          | Organic anxiety disorder                            | 17496003          | S             | Conditions  | SNOMED          |
| HP_0000739   | anxiety         | 4193634         | Worried                                             | 79015004          | S             | Conditions  | SNOMED          |
| HP_0000739   | anxiety         | 440083          | Acute stress disorder                               | 67195008          | S             | Conditions  | SNOMED          |
| HP_0000739   | anxiety         | 4098314         | Chronic anxiety                                     | 191708009         | S             | Conditions  | SNOMED          |
| HP_0000739   | anxiety         | 4138454         | Chronic stress disorder                             | 426174008         | S             | Conditions  | SNOMED          |
| HP_0000739   | anxiety         | 4239819         | Distress                                            | 69328002          | S             | Conditions  | SNOMED          |
| HP_0000739   | anxiety         | 4142455         | Feeling hopeless                                    | 307077003         | S             | Conditions  | SNOMED          |
| HP_0000739   | anxiety         | 436817          | Feeling nervous                                     | 424196004         | S             | Conditions  | SNOMED          |
| HP_0000739   | anxiety         | 434613          | Generalized anxiety disorder                        | 21897009          | S             | Conditions  | SNOMED          |
| HP_0000739   | anxiety         | 4322025         | Mild anxiety                                        | 70997004          | S             | Conditions  | SNOMED          |

**White Paper:** Can longitudinal electronic health record data identify patients at higher risk of developing long COVID?

|            |                |          |                                          |           |   |            |        |
|------------|----------------|----------|------------------------------------------|-----------|---|------------|--------|
| HP_0000739 | anxiety        | 4263429  | Moderate anxiety                         | 61387006  | S | Conditions | SNOMED |
| HP_0000739 | anxiety        | 4103273  | Recurrent anxiety                        | 191709001 | S | Conditions | SNOMED |
| HP_0000739 | anxiety        | 4214746  | Severe anxiety                           | 80583007  | S | Conditions | SNOMED |
| HP_0000739 | anxiety        | 4216670  | Worried well                             | 81302005  | S | Conditions | SNOMED |
| HP_0002027 | abdominal pain | 4183041  | Abdominal discomfort                     | 43364001  | S | Conditions | SNOMED |
| HP_0002027 | abdominal pain | 200219   | Abdominal pain                           | 21522001  | S | Conditions | SNOMED |
| HP_0002027 | abdominal pain | 4152197  | Stomach ache                             | 271681002 | S | Conditions | SNOMED |
| HP_0002027 | abdominal pain | 4012224  | Upset stomach                            | 162059005 | S | Conditions | SNOMED |
| HP_0002027 | abdominal pain | 4200114  | Abdominal pain - cause unknown           | 314212008 | S | Conditions | SNOMED |
| HP_0002027 | abdominal pain | 4263576  | Abdominal wind pain                      | 45979003  | S | Conditions | SNOMED |
| HP_0002027 | abdominal pain | 4002232  | Epigastric discomfort                    | 119416008 | S | Conditions | SNOMED |
| HP_0002027 | abdominal pain | 761102   | Intractable abdominal pain               | 1.47E+16  | S | Conditions | SNOMED |
| HP_0002027 | abdominal pain | 4152353  | Loin pain                                | 271857006 | S | Conditions | SNOMED |
| HP_0002027 | abdominal pain | 4182562  | Lower abdominal pain                     | 54586004  | S | Conditions | SNOMED |
| HP_0002027 | abdominal pain | 4306292  | Upper abdominal pain                     | 83132003  | S | Conditions | SNOMED |
| HP_0002027 | abdominal pain | 4203705  | Visceral abdominal pain                  | 438506002 | S | Conditions | SNOMED |
| HP_0002027 | abdominal pain | 4241033  | Acute abdomen                            | 9209005   | S | Conditions | SNOMED |
| HP_0002027 | abdominal pain | 42710018 | Functional abdominal pain syndrome       | 449890002 | S | Conditions | SNOMED |
| HP_0002027 | abdominal pain | 4012222  | Central abdominal pain                   | 162046002 | S | Conditions | SNOMED |
| HP_0002027 | abdominal pain | 4008102  | Chronic abdominal pain                   | 111985007 | S | Conditions | SNOMED |
| HP_0002027 | abdominal pain | 4218793  | Colicky pain                             | 73063007  | S | Conditions | SNOMED |
| HP_0002027 | abdominal pain | 201418   | Flatulence, eructation and gas pain      | 271832001 | S | Conditions | SNOMED |
| HP_0002027 | abdominal pain | 197988   | Generalized abdominal pain               | 102614006 | S | Conditions | SNOMED |
| HP_0002027 | abdominal pain | 193317   | Generalized abdominal rigidity           | 440122009 | S | Conditions | SNOMED |
| HP_0002027 | abdominal pain | 443629   | Generalized abdominal tenderness         | 440220007 | S | Conditions | SNOMED |
| HP_0002027 | abdominal pain | 195083   | Left lower quadrant pain                 | 301716002 | S | Conditions | SNOMED |
| HP_0002027 | abdominal pain | 4109084  | Left sided abdominal pain                | 285387005 | S | Conditions | SNOMED |
| HP_0002027 | abdominal pain | 194175   | Left upper quadrant pain                 | 301715003 | S | Conditions | SNOMED |
| HP_0002027 | abdominal pain | 4128083  | Nonspecific abdominal pain               | 304542004 | S | Conditions | SNOMED |
| HP_0002027 | abdominal pain | 4115547  | Rebound tenderness of left hypochondrium | 301414000 | S | Conditions | SNOMED |

**White Paper:** Can longitudinal electronic health record data identify patients at higher risk of developing long COVID?

|            |                      |          |                                                           |           |   |            |        |
|------------|----------------------|----------|-----------------------------------------------------------|-----------|---|------------|--------|
| HP_0002027 | abdominal pain       | 4118277  | Rebound tenderness of right hypochondrium                 | 301413006 | S | Conditions | SNOMED |
| HP_0002027 | abdominal pain       | 4258543  | Recurrent abdominal pain                                  | 439469002 | S | Conditions | SNOMED |
| HP_0002027 | abdominal pain       | 193322   | Right lower quadrant pain                                 | 301754002 | S | Conditions | SNOMED |
| HP_0002027 | abdominal pain       | 4109085  | Right sided abdominal pain                                | 285388000 | S | Conditions | SNOMED |
| HP_0002027 | abdominal pain       | 198263   | Right upper quadrant pain                                 | 301717006 | S | Conditions | SNOMED |
| HP_0002355 | difficulty walking   | 36714126 | Difficulty walking                                        | 719232003 | S | Conditions | SNOMED |
| HP_0002355 | difficulty walking   | 439405   | Walking disability                                        | 228158008 | S | Conditions | SNOMED |
| HP_0002355 | difficulty walking   | 4107172  | Difficulty in starting and stopping walking spontaneously | 282220004 | S | Conditions | SNOMED |
| HP_0002355 | difficulty walking   | 4107168  | Difficulty in stopping walking                            | 282213006 | S | Conditions | SNOMED |
| HP_0002355 | difficulty walking   | 4084106  | Difficulty initiating walking                             | 282207002 | S | Conditions | SNOMED |
| HP_0002355 | difficulty walking   | 4107166  | Does not initiate walking                                 | 282206006 | S | Conditions | SNOMED |
| HP_0002355 | difficulty walking   | 4116707  | Unable to weight-bear                                     | 285674009 | S | Conditions | SNOMED |
| HP_0003546 | exercise intolerance | 4147189  | Impaired exercise tolerance                               | 267044007 | S | Conditions | SNOMED |
| HP_0003546 | exercise intolerance | 4299640  | Activity intolerance                                      | 77427003  | S | Conditions | SNOMED |
| HP_0003546 | exercise intolerance | 4000163  | Cough on exercise                                         | 19282004  | S | Conditions | SNOMED |
| HP_0012378 | fatigue              | 4223659  | Fatigue                                                   | 84229001  | S | Conditions | SNOMED |
| HP_0012378 | fatigue              | 4309912  | Generally unwell                                          | 213257006 | S | Conditions | SNOMED |
| HP_0012378 | fatigue              | 4087481  | Lack of energy                                            | 248274002 | S | Conditions | SNOMED |
| HP_0012378 | fatigue              | 4272240  | Malaise                                                   | 367391008 | S | Conditions | SNOMED |
| HP_0012378 | fatigue              | 4074624  | Tired                                                     | 224960004 | S | Conditions | SNOMED |
| HP_0012378 | fatigue              | 4086975  | Undifferentiated illness: Vague ill health                | 248282002 | S | Conditions | SNOMED |
| HP_0012378 | fatigue              | 4152509  | C/O - "tired all the time"                                | 272062008 | S | Conditions | SNOMED |
| HP_0012378 | fatigue              | 4060222  | Chronic sick                                              | 161901003 | S | Conditions | SNOMED |
| HP_0012378 | fatigue              | 4158498  | Fatigue - symptom                                         | 272060000 | S | Conditions | SNOMED |
| HP_0012378 | fatigue              | 4198140  | Feeling tired                                             | 314109004 | S | Conditions | SNOMED |
| HP_0012378 | fatigue              | 4060217  | Heavy feeling                                             | 161874006 | S | Conditions | SNOMED |
| HP_0012378 | fatigue              | 439926   | Malaise and fatigue                                       | 271795006 | S | Conditions | SNOMED |
| HP_0012378 | fatigue              | 37017316 | Occasionally tired                                        | 713568000 | S | Conditions | SNOMED |
| HP_0012378 | fatigue              | 4092860  | Rapid fatigue of gait                                     | 250002000 | S | Conditions | SNOMED |
| HP_0012378 | fatigue              | 4149857  | Tired all the time                                        | 267032009 | S | Conditions | SNOMED |



|            |         |         |                         |           |   |            |        |
|------------|---------|---------|-------------------------|-----------|---|------------|--------|
| HP_0012378 | fatigue | 4086973 | Tired on least exertion | 248269005 | S | Conditions | SNOMED |
| HP_0012378 | fatigue | 4147184 | Tiredness symptom       | 267031002 | S | Conditions | SNOMED |
| HP_0012378 | fatigue | 4246495 | Exhaustion              | 60119000  | S | Conditions | SNOMED |

574

575 **Appendix A4: Qualifying Respiratory Symptoms and OMOP Codes**

576 Table of qualifying Respiratory Long COVID symptoms

| phenotype_id | phenotype_label                            | omop_concept_id | omop_concept_label                                             | omop_concept_code | omop_standard | omop_domain | omop_vocabulary |
|--------------|--------------------------------------------|-----------------|----------------------------------------------------------------|-------------------|---------------|-------------|-----------------|
| HP_0002094   | dyspnea                                    | 4305080         | Abnormal breathing                                             | 386813002         | S             | Conditions  | SNOMED          |
| HP_0002094   | dyspnea                                    | 312437          | Dyspnea                                                        | 267036007         | S             | Conditions  | SNOMED          |
| HP_0002094   | dyspnea                                    | 4060052         | Dyspnea at rest                                                | 161941007         | S             | Conditions  | SNOMED          |
| HP_0002094   | dyspnea                                    | 43020567        | Air leaking from lung                                          | 471283005         | S             | Conditions  | SNOMED          |
| HP_0002094   | dyspnea                                    | 4094132         | Nocturnal dyspnea                                              | 248548009         | S             | Conditions  | SNOMED          |
| HP_0002110   | bronchiectasis                             | 256449          | Bronchiectasis                                                 | 12295008          | S             | Conditions  | SNOMED          |
| HP_0002110   | bronchiectasis                             | 4052549         | Acquired bronchiectasis                                        | 233628009         | S             | Conditions  | SNOMED          |
| HP_0002110   | bronchiectasis                             | 4052550         | Idiopathic bronchiectasis                                      | 233629001         | S             | Conditions  | SNOMED          |
| HP_0002110   | bronchiectasis                             | 40483342        | Acute exacerbation of bronchiectasis                           | 445378003         | S             | Conditions  | SNOMED          |
| HP_0002110   | bronchiectasis                             | 4027836         | Fusiform bronchiectasis                                        | 13217005          | S             | Conditions  | SNOMED          |
| HP_0002875   | exertional dyspnea                         | 4263848         | Dyspnea on exertion                                            | 60845006          | S             | Conditions  | SNOMED          |
| HP_0006530   | abnormal pulmonary interstitial morphology | 4119786         | Interstitial lung disease                                      | 233703007         | S             | Conditions  | SNOMED          |
| HP_0006530   | abnormal pulmonary interstitial morphology | 438791          | Pulmonary congestion and hypostasis                            | 196115007         | S             | Conditions  | SNOMED          |
| HP_0006530   | abnormal pulmonary interstitial morphology | 45768996        | Pulmonary interstitial glycogenosis                            | 707551007         | S             | Conditions  | SNOMED          |
| HP_0006530   | abnormal pulmonary interstitial morphology | 762964          | Chronic interstitial lung disease                              | 4.34301E+14       | S             | Conditions  | SNOMED          |
| HP_0006530   | abnormal pulmonary interstitial morphology | 4045227         | Respiratory bronchiolitis associated interstitial lung disease | 129451001         | S             | Conditions  | SNOMED          |
| HP_0012735   | cough                                      | 4158493         | C/O - cough                                                    | 272039006         | S             | Conditions  | SNOMED          |
| HP_0012735   | cough                                      | 254761          | Cough                                                          | 49727002          | S             | Conditions  | SNOMED          |
| HP_0012735   | cough                                      | 4195384         | Chronic cough                                                  | 68154008          | S             | Conditions  | SNOMED          |

**White Paper:** Can longitudinal electronic health record data identify patients at higher risk of developing long COVID?

|            |                                                  |          |                                      |           |   |            |        |
|------------|--------------------------------------------------|----------|--------------------------------------|-----------|---|------------|--------|
| HP_0012735 | cough                                            | 4086814  | Clearing throat - hawking            | 248589007 | S | Conditions | SNOMED |
| HP_0012735 | cough                                            | 4048098  | Cough with fever                     | 135883003 | S | Conditions | SNOMED |
| HP_0012735 | cough                                            | 4269800  | Nocturnal cough                      | 62548007  | S | Conditions | SNOMED |
| HP_0012735 | cough                                            | 4144596  | Pain provoked by coughing            | 427146008 | S | Conditions | SNOMED |
| HP_0012735 | cough                                            | 4090569  | Painful cough                        | 247410004 | S | Conditions | SNOMED |
| HP_0012735 | cough                                            | 4109381  | Persistent cough                     | 284523002 | S | Conditions | SNOMED |
| HP_0012735 | cough                                            | 4099940  | Psychogenic cough                    | 191954008 | S | Conditions | SNOMED |
| HP_0025179 | Ground-glass opacification on pulmonary HRCT     | 4318404  | Lung consolidation                   | 95436008  | S | Conditions | SNOMED |
| HP_0025179 | Ground-glass opacification on pulmonary HRCT     | 4306177  | On examination - lung consolidation  | 419449001 | S | Conditions | SNOMED |
| HP_0025390 | Reticular pattern on pulmonary HRCT              | 4318404  | Lung consolidation                   | 95436008  | S | Conditions | SNOMED |
| HP_0025390 | Reticular pattern on pulmonary HRCT              | 4306177  | On examination - lung consolidation  | 419449001 | S | Conditions | SNOMED |
| HP_0030877 | Reduced FEV1/FVC ratio                           | 4064741  | FEV1/FVC ratio abnormal              | 165044007 | S | Conditions | SNOMED |
| HP_0030879 | Interlobular septal thickening on pulmonary HRCT | 4318404  | Lung consolidation                   | 95436008  | S | Conditions | SNOMED |
| HP_0030879 | Interlobular septal thickening on pulmonary HRCT | 4306177  | On examination - lung consolidation  | 419449001 | S | Conditions | SNOMED |
| HP_0031245 | productive cough                                 | 4102774  | Productive cough                     | 28743005  | S | Conditions | SNOMED |
| HP_0031246 | nonproductive cough                              | 4038519  | Dry cough                            | 11833005  | S | Conditions | SNOMED |
| HP_0031983 | Abnormal pulmonary thoracic imaging finding      | 4318404  | Lung consolidation                   | 95436008  | S | Conditions | SNOMED |
| HP_0031983 | Abnormal pulmonary thoracic imaging finding      | 4306177  | On examination - lung consolidation  | 419449001 | S | Conditions | SNOMED |
| HP_0032177 | Parenchymal consolidation                        | 4318404  | Lung consolidation                   | 95436008  | S | Conditions | SNOMED |
| HP_0032177 | Parenchymal consolidation                        | 4306177  | On examination - lung consolidation  | 419449001 | S | Conditions | SNOMED |
| HP_0032341 | Reduced forced vital capacity                    | 4065408  | FVC - forced vital capacity abnormal | 165040003 | S | Conditions | SNOMED |
| HP_0032342 | Reduced forced expiratory volume in one second   | 4151447  | FEV1/FVC < 70% of predicted          | 314472003 | S | Conditions | SNOMED |
| HP_0033106 | Elevated D-dimers                                | 42709958 | D-dimer above reference range        | 449830004 | S | Conditions | SNOMED |
| HP_0033169 | Reduced total lung capacity                      | 4267216  | Decreased total lung capacity        | 36317006  | S | Conditions | SNOMED |
| HP_0045051 | Decreased DLCO                                   | 4142621  | Decreased diffusion capacity of lung | 34627006  | S | Conditions | SNOMED |
